# Supplementary material for: An unprecedented ring-opening reaction of N-(aziridin-2-ylmethylene)hydrazines to facile synthesis of functionalized enamines catalysed by Lewis acid
Source: Royal Society of Chemistry journal article supplement (doi:10.1039/c2cc31911j), 2012-01-01

## Supporting Information

### An Unprecedented Ring-Opening Reaction of *N*-(Aziridin-2-ylmethylene)hydrazines to Facile Synthesis of Functionalized Enamines Catalysed by Lewis Acid

Zhen Zhang<sup>a</sup>, Yin Wei<sup>b</sup> and Min Shi<sup>a,b\*</sup>

#### Content

|                                                                     |         |
|---------------------------------------------------------------------|---------|
| 1. General Information.....                                         | S2      |
| 2. General Procedure for the Preparation of Compound <b>1</b> ..... | S2      |
| 3. General Procedure for the Preparation of Compound <b>2</b> ..... | S2–S3   |
| 4. X-ray Data of <b>1i</b> and <b>2i</b> .....                      | S3–S4   |
| 5. References.....                                                  | S4–S5   |
| 6. Spectroscopic Data of Synthesized Compounds.....                 | S5–S44  |
| 7. Isotope Labeling Experiments.....                                | S44–S49 |

## 1. General Information

Melting points were obtained with a Yanagimoto micro melting point apparatus and are uncorrected. <sup>1</sup>H NMR spectra were recorded on a Bruker AM-300 or AM-400 spectrometer for solution in CDCl<sub>3</sub> with tetramethylsilane (TMS) as internal standard; *J*-values are in Hz. Mass spectra were recorded with a HP-5989 instrument. All of the compounds reported in this paper gave satisfactory HRMS analytic data. Commercially obtained reagents were used without further purification. Dichloromethane was distilled from calcium hydride under argon. All reactions were monitored by TLC with Huanghai GF<sub>254</sub> silica gel coated plates. Flash column chromatography was carried out using 300–400 mesh silica gel at increased pressure.

## 2. General Procedure for the Preparation of Compound 1

*N*-Sulfonylhydrazone was synthesized from various aldehydes and sulfonylhydrazides by the known procedure.<sup>[1-3]</sup> Substituted *N*-sulfonylhydrazone **S1** was produced according to the typical Mitsunobu reaction procedure.<sup>[4]</sup>

*N*-(Aziridin-2-ylmethylene)hydrazine **1** was obtained by copper-catalyzed olefin aziridination according to the reported procedure.<sup>[5]</sup> CuCl (10 mol %) was added to a suspension of the *N*-sulfonylhydrazone **S1** (2.0 equiv) and PhI=NNs (1.0 equiv) in MeCN at room temperature.<sup>[6]</sup> When all of the PhI=NNs was consumed (< 5 h), the solvent was removed under reduced pressure and the residue was purified by silica gel flash chromatography (eluent: petroleum ether/ethyl acetate = 4/1) to afford **1**.

## 3. General Procedure for the Preparation of Compound 2

To a solution of substrate **1** (0.2 mmol) in dry dichloromethane (1.0 mL) was added BF<sub>3</sub>·Et<sub>2</sub>O

(0.02 mmol) dropwise at room temperature then the reaction was stirred for 5 min. When the reaction completed, the yellow mixture was evaporated under reduced pressure and the residue was purified by silica gel flash column chromatography eluting with petroleum and ethyl acetate (v/v, 3/1). Compound **2** could be afforded as a yellow solid or oil.

#### 4. X-ray Data of **1i** and **2i**

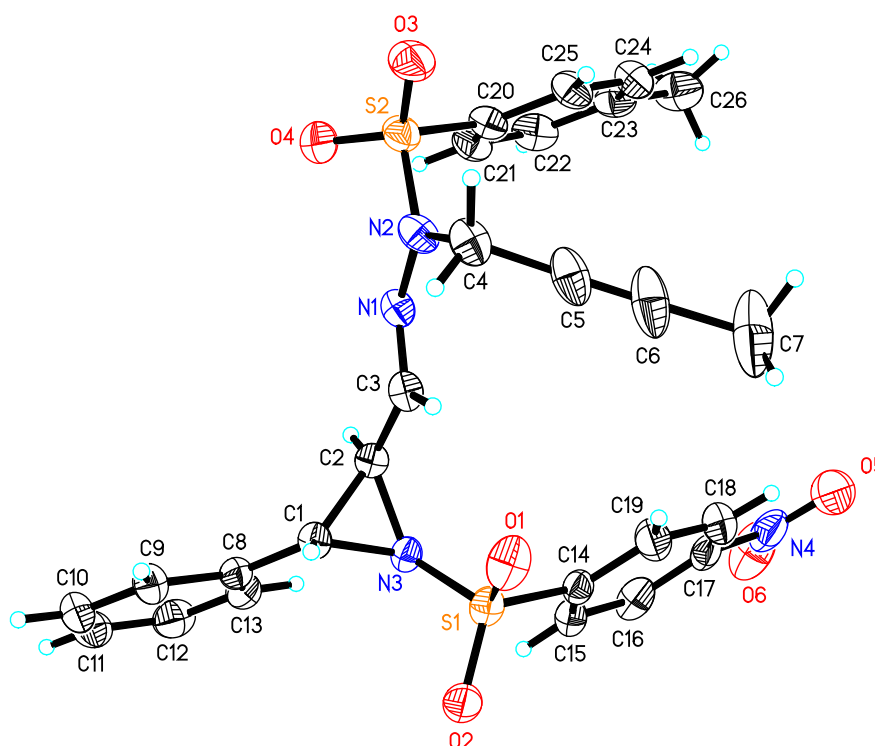

The crystal data of **1i** have been deposited in CCDC with number 848929. Empirical Formula:  $C_{26}H_{24}N_4O_6S_2$ ; Formula Weight: 552.61; Crystal Color, Habit: colorless; Crystal Dimensions: 0.276 x 0.165 x 0.137 mm; Crystal System: Triclinic; Lattice Parameters:  $a = 9.682(2)\text{\AA}$ ,  $\alpha = 107.220(4)\text{ deg.}$ ;  $b = 10.655(2)\text{\AA}$ ,  $\beta = 96.011(4)\text{ deg.}$ ;  $c = 15.011(3)\text{\AA}$ ,  $\gamma = 110.395(3)\text{ deg.}$ ;  $V = 1348.5(5)\text{ \AA}^3$ ; Space group: P-1;  $Z = 2$ ;  $D_{calc} = 1.361\text{ g/cm}^3$ ;  $F_{000} = 576$ ; Diffractometer: Rigaku AFC7R; Residuals:  $R$ ;  $R_w$ : 0.0563, 0.1491.

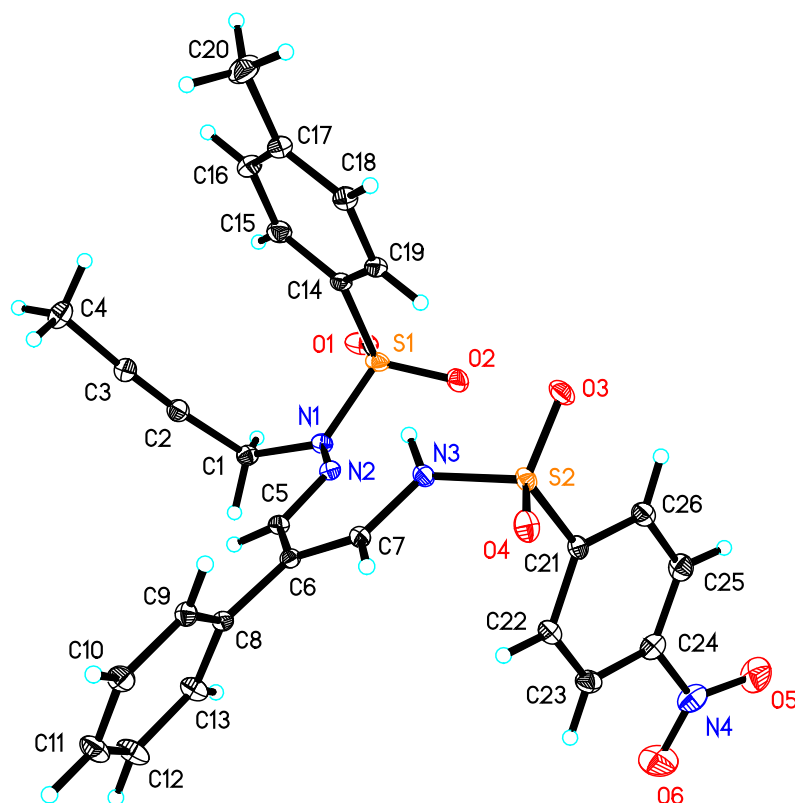

The crystal data of **2i** have been deposited in CCDC with number 845691. Empirical Formula:  $C_{26}H_{24}N_4O_6S_2$ ; Formula Weight: 552.61; Crystal Color, Habit: colorless; Crystal Dimensions: 0.25 x 0.18 x 0.15 mm; Crystal System: Triclinic; Lattice Parameters:  $a = 9.0221(10)$  Å,  $\alpha = 69.652(2)$  deg.;  $b = 12.4227(14)$  Å,  $\beta = 74.456(2)$  deg.;  $c = 12.8373(14)$  Å,  $\gamma = 87.696(2)$  deg.;  $V = 1297.4(2)$  Å<sup>3</sup>; Space group: P-1;  $Z = 2$ ;  $D_{calc} = 1.415$  g/cm<sup>3</sup>;  $F_{000} = 576$ ; Diffractometer: Rigaku AFC7R; Residuals: R;  $R_w = 0.0473, 0.1271$ .

## 5. References

- [1] L. Nagarapu, N. Ravirala, D. Akkewar, *Synth. Commun.* **2002**, *32*, 2195–2202.
- [2] V. K. Aggarwal, E. Alonso, I. Bae, G. Hynd, K. M. Lydon, M. J. Palmer, M. Patel, M. Porcelloni, J. Richardson, R. A. Stenson, J. R. Studley, J.-L. Vasse, C. L. Winn, *J. Am. Chem. Soc.* **2003**, *125*, 10926–10940.
- [3] Z. Zhang, M. Shi, *Chem. Eur. J.* **2012**, *18*, 3654–3658.
- [4] J. M. Keith, L. Gomez, *J. Org. Chem.* **2006**, *71*, 7113–7116.
- [5] D. A. Evans, M. M. Faul, M. T. Bilodeau, *J. Am. Chem. Soc.* **1994**, *116*, 2742–2753.
- [6] J. Gullick, D. Ryan, P. McMorn, D. Bethell, F. King, F. Hancock, G. Hutching, *New J.*

*Chem.* **2004**, *28*, 1470–1478.

## 6. Spectroscopic Data of the Synthesized Compounds

Compound **S1b**: a white solid; mp. 185–187 °C; IR (neat)  $\nu$  2951, 2924, 1623, 1596, 1491, 1463, 1353, 1167, 1090, 1012, 973  $\text{cm}^{-1}$ ;  $^1\text{H}$  NMR ( $\text{CDCl}_3$ , 400 MHz, TMS)  $\delta$  2.40 (3H, s), 3.17 (3H, s), 6.75 (1H, d,  $J = 16.0$  Hz), 6.92 (1H, dd,  $J = 8.8, 16.0$  Hz), 7.29–7.36 (6H, m), 7.40 (1H, d,  $J = 8.8$  Hz), 7.76 (2H, d,  $J = 8.0$  Hz);  $^{13}\text{C}$  NMR ( $\text{CDCl}_3$ , 100 MHz, TMS)  $\delta$  21.5, 33.3, 126.1, 127.98, 128.01, 129.0, 129.5, 133.3, 134.3, 134.5, 137.4, 144.1, 145.3; MS (ESI)  $m/z$  349.0 ( $\text{M}^+ + \text{H}$ ); HRMS (ESI) calcd. for  $\text{C}_{17}\text{H}_{18}\text{N}_2\text{O}_2\text{SCl}^+$ : 349.0772, Found: 349.0770.

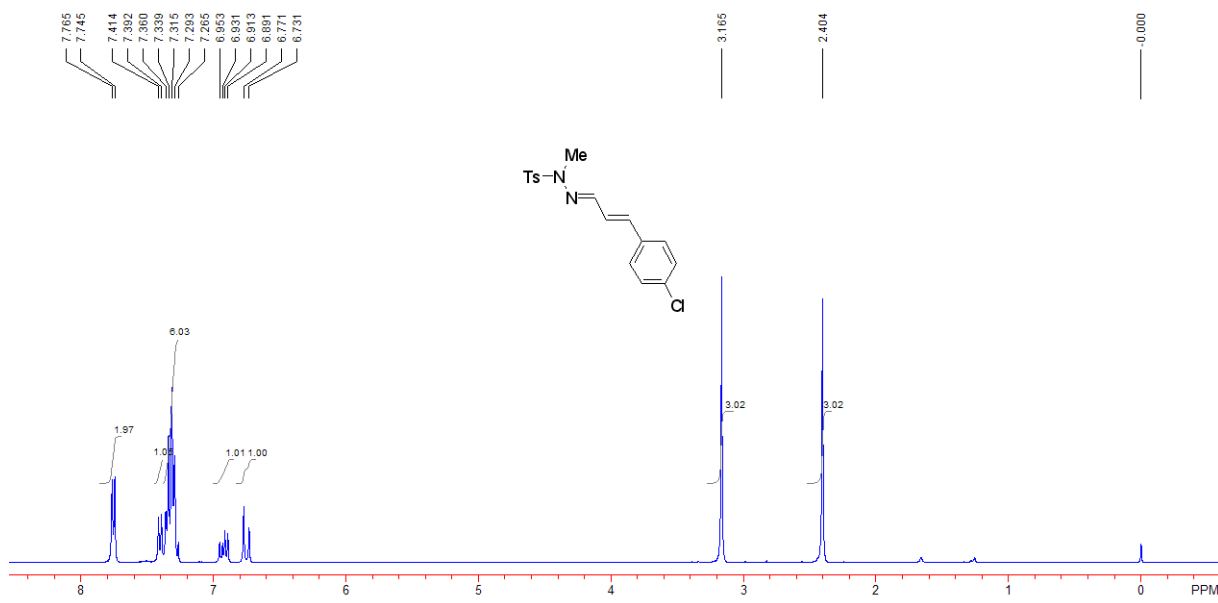

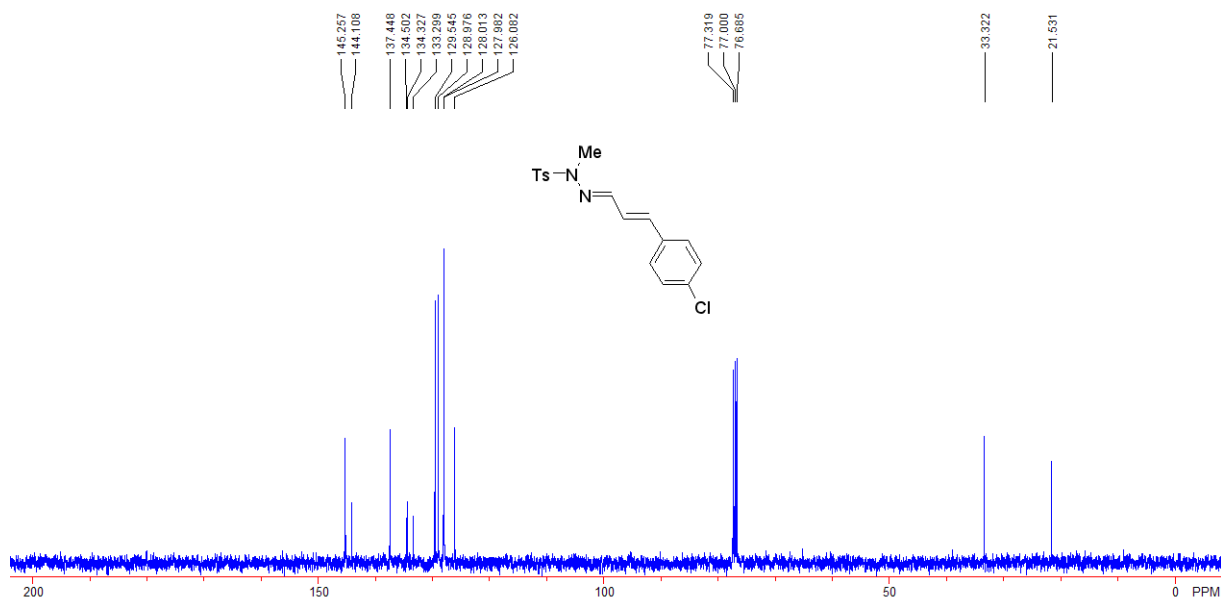

Compound **1c**: a white solid; mp. 125–127 °C; IR (neat)  $\nu$  2923, 2868, 1629, 1597, 1511, 1461, 1352, 1206, 1166, 1087, 975  $\text{cm}^{-1}$ ;  $^1\text{H}$  NMR ( $\text{CDCl}_3$ , 400 MHz, TMS)  $\delta$  2.35 (3H, s), 2.40 (3H, s), 3.14 (3H, s), 6.79 (1H, d,  $J = 16.0$  Hz), 6.91 (1H, dd,  $J = 8.8, 16.0$  Hz), 7.15 (2H, d,  $J = 7.6$  Hz), 7.26–7.33 (4H, m), 7.44 (1H, d,  $J = 8.8$  Hz), 7.75 (2H, d,  $J = 8.0$  Hz);  $^{13}\text{C}$  NMR ( $\text{CDCl}_3$ , 100 MHz, TMS)  $\delta$  21.3, 21.5, 33.5, 124.5, 126.8, 128.0, 129.5, 133.0, 133.2, 139.1, 139.3, 144.0, 146.7; MS (ESI)  $m/z$  329.1 ( $\text{M}^+\text{+H}$ ); HRMS (ESI) calcd. for  $\text{C}_{18}\text{H}_{21}\text{N}_2\text{O}_2\text{S}^{\text{+1}}$ : 329.1318, Found: 329.1311.

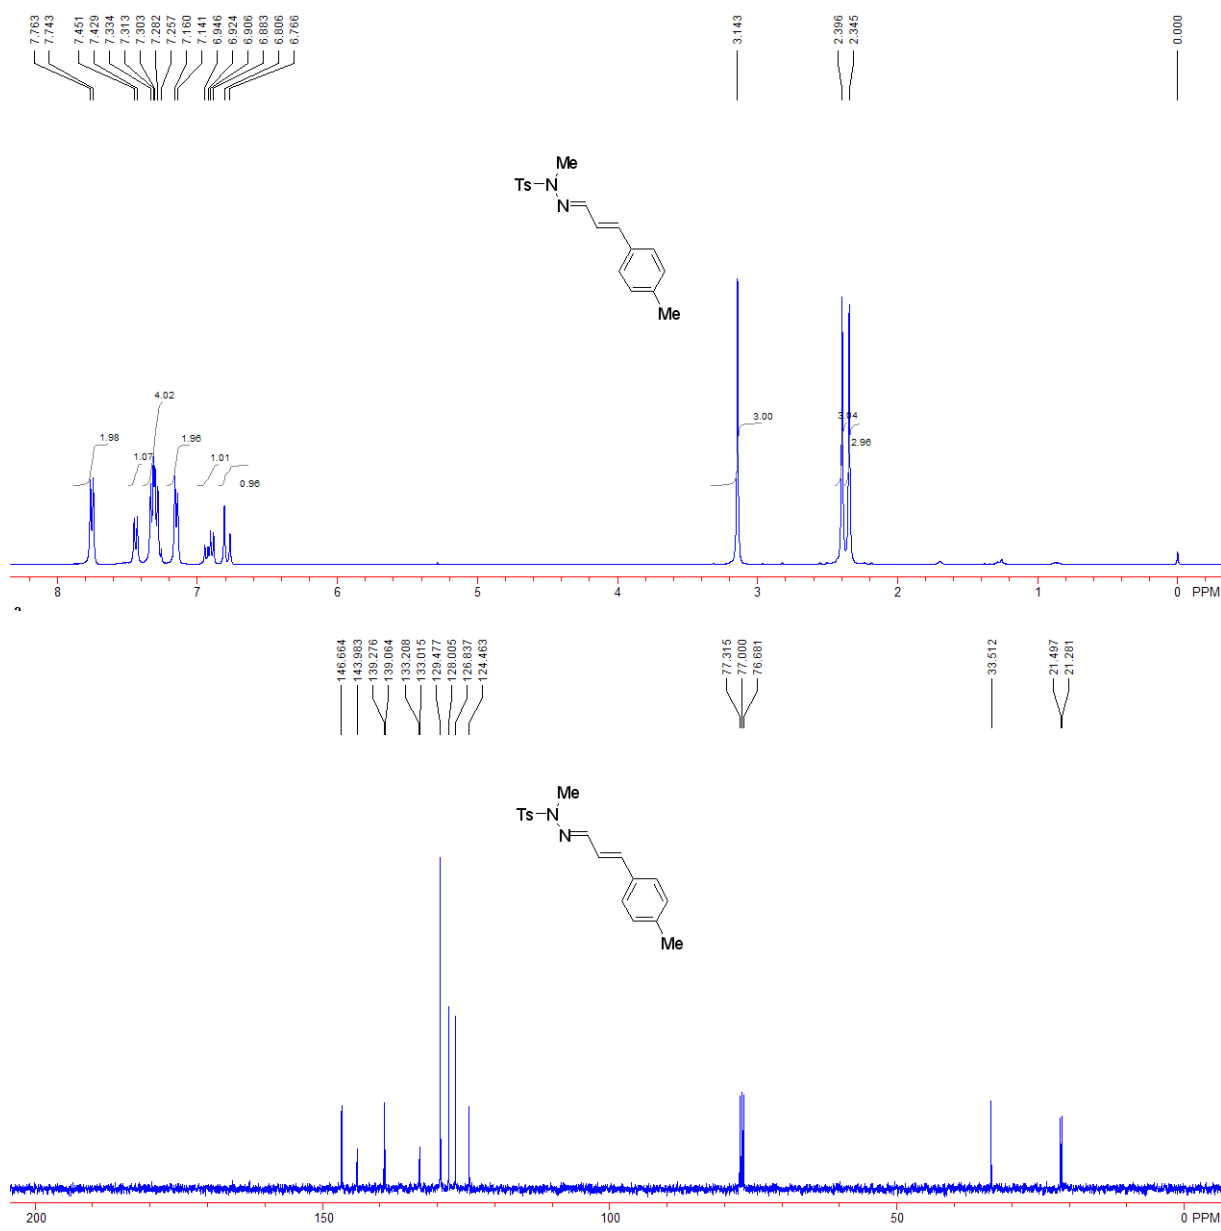

Compound **S1d**: a white solid; mp. 137–139 °C; IR (neat)  $\nu$  2954, 1596, 1465, 1354, 1206, 1168, 1089, 1023, 971  $\text{cm}^{-1}$ ;  $^1\text{H}$  NMR ( $\text{CDCl}_3$ , 400 MHz, TMS)  $\delta$  2.41 (3H, s), 3.20 (3H, s), 6.92 (1H, dd,  $J = 8.8, 16.0$  Hz), 7.14 (1H, d,  $J = 8.0$  Hz), 7.18 (1H, d,  $J = 16.0$  Hz), 7.29–7.32 (3H, m), 7.44 (1H, d,  $J = 8.8$  Hz), 7.58 (2H, dd,  $J = 8.0, 16.0$  Hz), 7.76 (2H, d,  $J = 8.4$  Hz);  $^{13}\text{C}$  NMR ( $\text{CDCl}_3$ , 100 MHz, TMS)  $\delta$  21.5, 33.2, 124.2, 126.8, 127.7, 128.0, 128.1, 129.6,

129.9, 133.2, 133.4, 135.5, 136.8, 144.1, 144.6; MS (ESI)  $m/z$  395.0 ( $M^+ + H$ ); HRMS (ESI)  
calcd. for  $C_{17}H_{18}N_2O_2SBr^{+1}$ : 393.0267, Found: 393.0250.

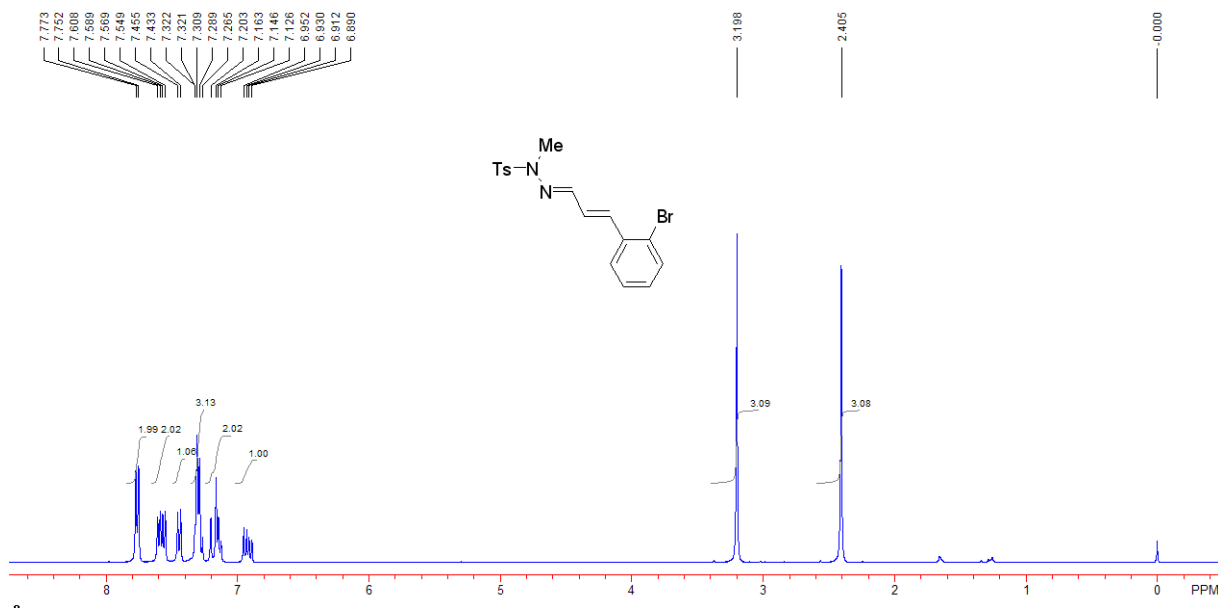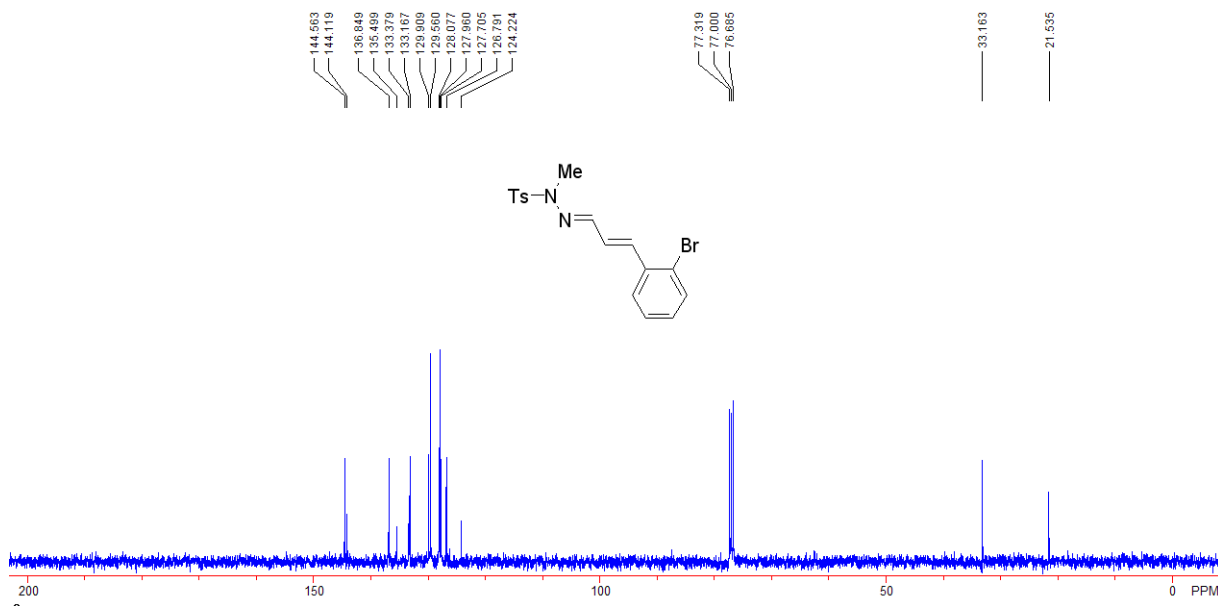

Compound **11e**: a white solid; mp. 121–123 °C; IR (neat)  $\nu$  2956, 1628, 1597, 1489, 1464, 1352, 1291, 1273, 1159, 1089, 1043, 975  $cm^{-1}$ ;  $^1H$  NMR ( $CDCl_3$ , 400 MHz, TMS)  $\delta$  2.40 (3H, s), 3.16 (3H, s), 3.82 (3H, s), 6.78 (1H, d,  $J = 16.0$  Hz), 6.86 (1H, d,  $J = 8.0$  Hz),





Compound **S1f**: a white solid; mp. 173–175 °C; IR (neat)  $\nu$  2924, 1587, 1485, 1462, 1400, 1353, 1246, 1167, 1088, 1027, 977  $\text{cm}^{-1}$ ;  $^1\text{H}$  NMR ( $\text{CDCl}_3$ , 400 MHz, TMS)  $\delta$  2.39 (3H, s), 3.14 (3H, s), 3.83 (3H, s), 6.96 (1H, dd,  $J = 8.0, 16.0$  Hz), 7.00 (1H, s), 7.05 (1H, d,  $J = 8.0$  Hz), 7.07 (1H, d,  $J = 8.0$  Hz), 7.29 (2H, d,  $J = 8.0$  Hz), 7.30 (1H, d,  $J = 8.0$  Hz), 7.42 (1H, d,  $J = 8.4$  Hz), 7.75 (2H, d,  $J = 8.0$  Hz);  $^{13}\text{C}$  NMR ( $\text{CDCl}_3$ , 100 MHz, TMS)  $\delta$  21.5, 33.4, 55.7, 114.5, 123.3, 123.8, 126.3, 127.9, 128.0, 129.5, 133.0, 133.2, 144.0, 146.6, 157.3; MS (ESI)  $m/z$  425.0 ( $\text{M}^+ + \text{H}$ ); HRMS (ESI) calcd. for  $\text{C}_{18}\text{H}_{20}\text{N}_2\text{O}_3\text{SBr}^+$ : 423.0373, Found: 423.0360.

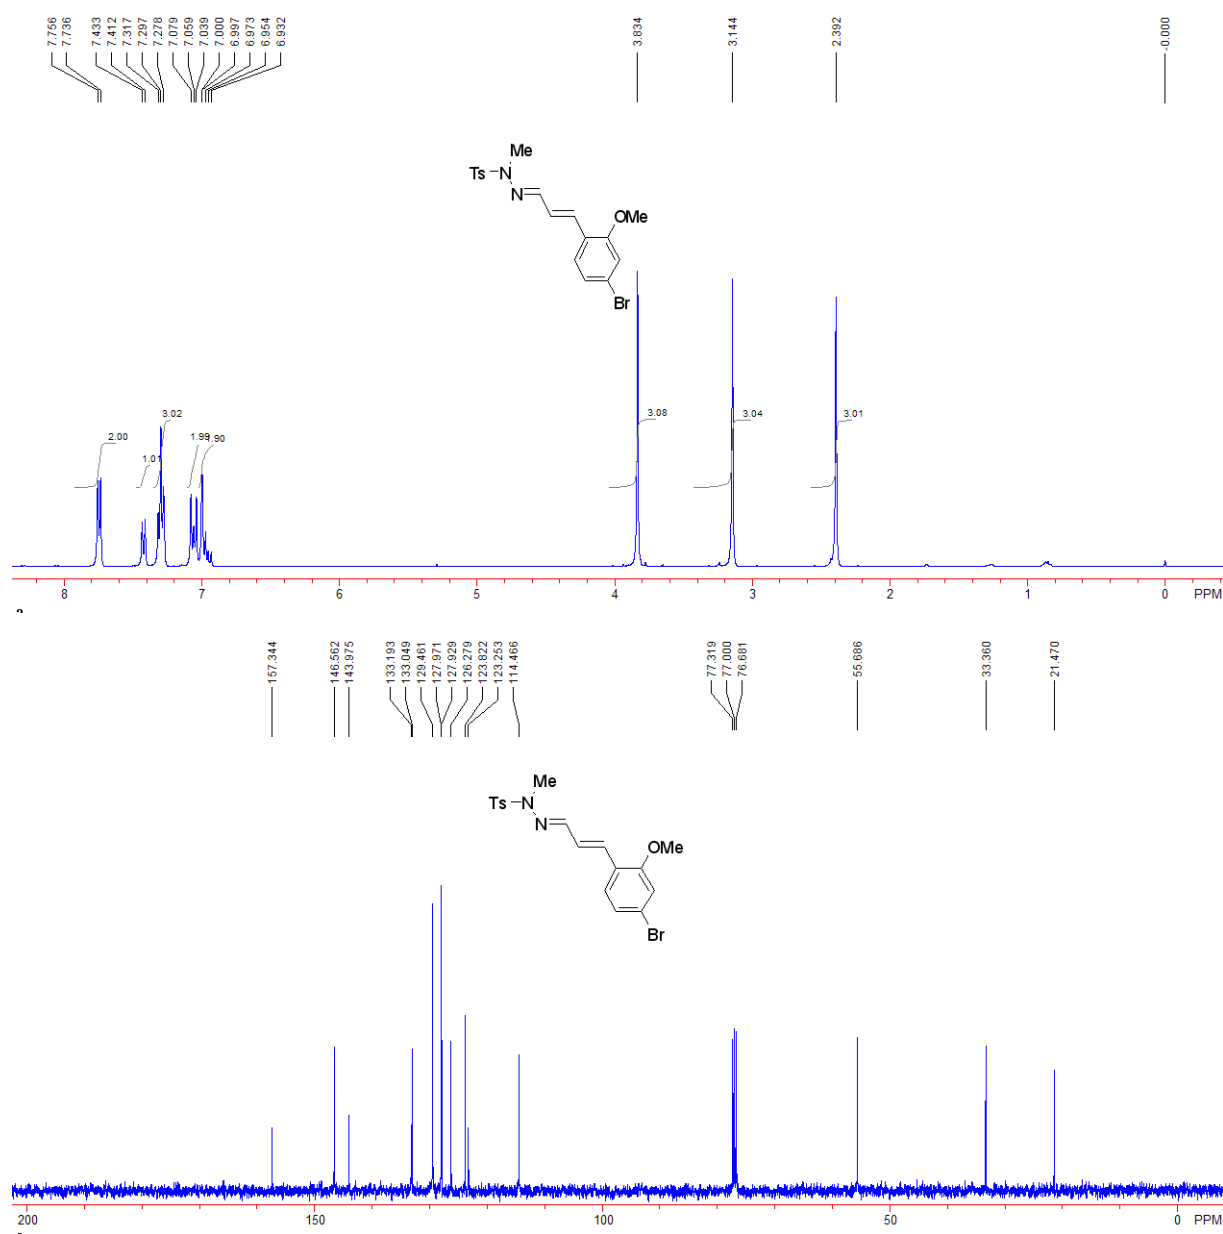

Compound **S1g**: a yellow oil; IR (neat)  $\nu$  2960, 1647, 1597, 1462, 1352, 1223, 1166, 1088, 977  $\text{cm}^{-1}$ ;  $^1\text{H}$  NMR ( $\text{CDCl}_3$ , 400 MHz, TMS) (*E*-isomer)  $\delta$  0.90 (3H, t,  $J = 7.2$  Hz), 1.39–1.48 (2H, m), 2.11–2.16 (2H, m), 2.39 (3H, s), 3.07 (3H, s), 6.06–6.11 (1H, m), 6.21–6.27 (1H, m), 7.28–7.33 (3H, m), 7.72 (2H, d,  $J = 8.0$  Hz);  $^{13}\text{C}$  NMR ( $\text{CDCl}_3$ , 100 MHz, TMS) (*E*-isomer)  $\delta$  13.3, 21.2, 21.4, 33.3, 34.4, 127.3, 127.8, 129.2, 132.8, 143.2, 143.7, 147.3; MS (EI)  $m/z$  280 ( $\text{M}^+$ , 2.68), 155 (4.03), 125 (100.00), 83 (58.19), 81 (15.09); HRMS (EI) calcd. for  $\text{C}_{14}\text{H}_{20}\text{N}_2\text{O}_2\text{S}^{+1}$ : 280.1245, Found: 280.1244.

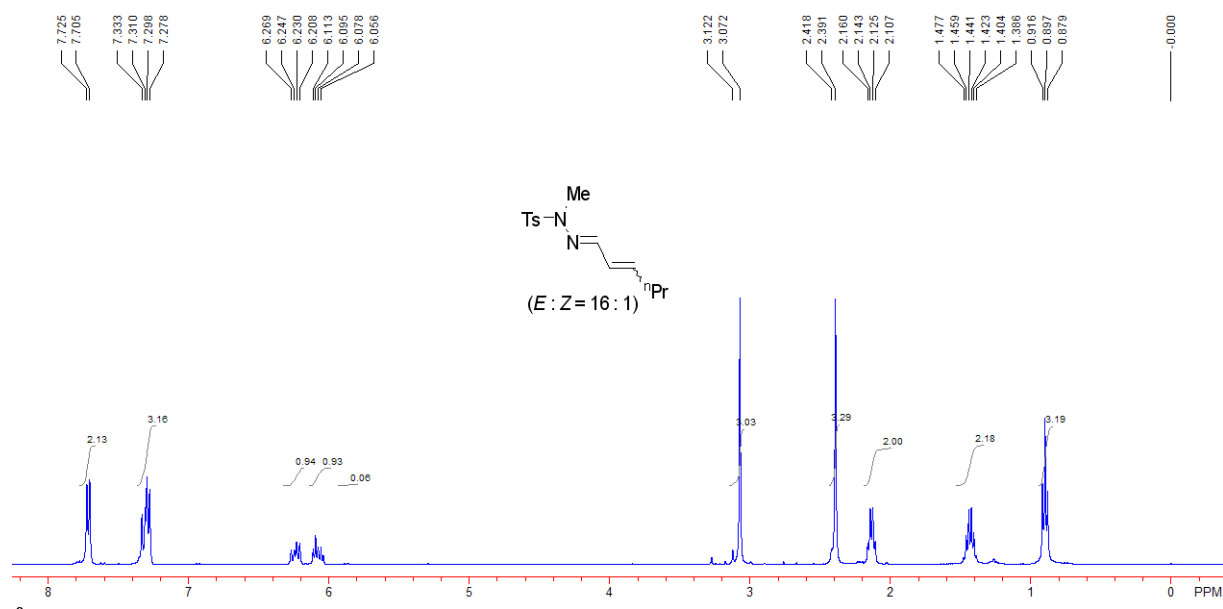

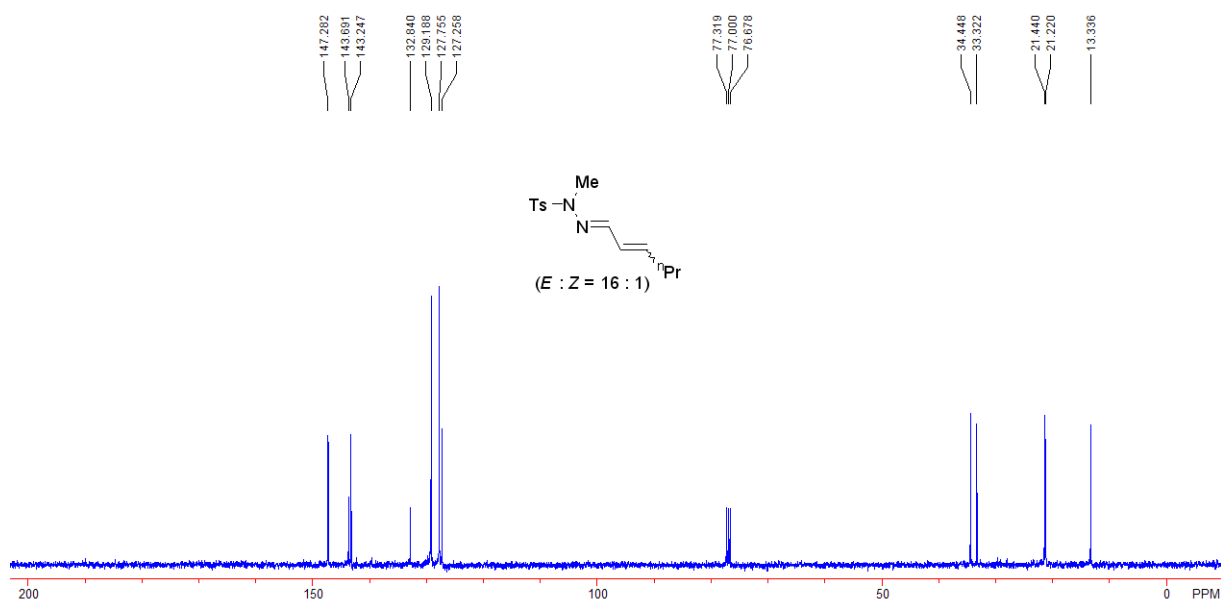

Compound **11h**: a white solid; mp. 157–159 °C; IR (neat)  $\nu$  2957, 1598, 1494, 1452, 1354, 1166, 1089, 1046, 973  $\text{cm}^{-1}$ ;  $^1\text{H}$  NMR ( $\text{CDCl}_3$ , 400 MHz, TMS)  $\delta$  2.40 (3H, s), 4.77 (2H, s), 6.61 (1H, d,  $J = 16.0$  Hz), 6.82 (1H, dd,  $J = 8.8, 16.0$  Hz), 7.23–7.32 (12H, m), 7.45 (1H, d,  $J = 8.8$  Hz), 7.82 (2H, d,  $J = 8.0$  Hz);  $^{13}\text{C}$  NMR ( $\text{CDCl}_3$ , 100 MHz, TMS)  $\delta$  21.5, 52.0, 125.0, 126.7, 126.8, 127.5, 127.9, 128.6, 128.77, 128.83, 129.5, 134.3, 135.2, 135.5, 139.7, 144.0, 149.2; MS (ESI)  $m/z$  391.0 ( $\text{M}^+ + \text{H}$ ); HRMS (ESI) calcd. for  $\text{C}_{23}\text{H}_{23}\text{N}_2\text{O}_2\text{S}^+$ : 391.1475, Found: 394.1476.

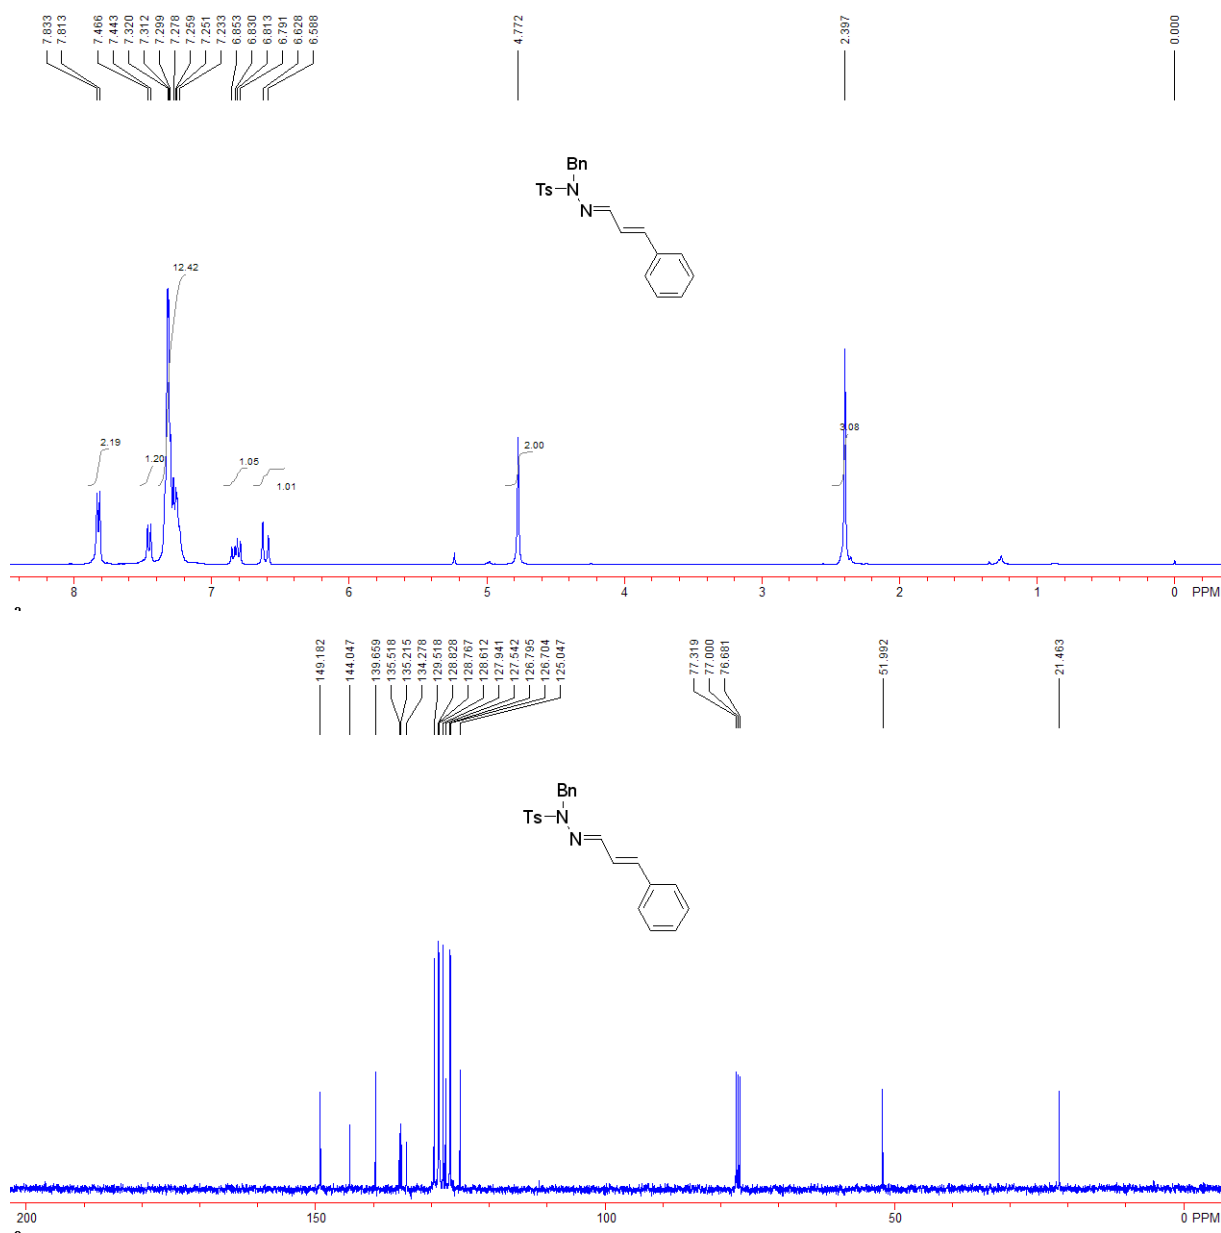

Compound **S1j**: a yellow oil; IR (neat)  $\nu$  3291, 2924, 1628, 1597, 1493, 1449, 1351, 1164, 1089, 973  $\text{cm}^{-1}$ ; <sup>1</sup>H NMR (CDCl<sub>3</sub>, 400 MHz, TMS)  $\delta$  2.05 (1H, t,  $J$  = 2.0 Hz), 2.40 (3H, s), 2.46 (2H, td,  $J$  = 2.0, 7.6 Hz), 3.64 (2H, t,  $J$  = 7.6 Hz), 6.91 (1H, dd,  $J$  = 8.4, 16.0 Hz), 6.98 (1H, d,  $J$  = 16.0 Hz), 7.29–7.38 (5H, m), 7.46 (2H, d,  $J$  = 7.2 Hz), 7.72 (2H, d,  $J$  = 8.4 Hz),

8.01 (1H, d,  $J = 8.4$  Hz);  $^{13}\text{C}$  NMR ( $\text{CDCl}_3$ , 100 MHz, TMS)  $\delta$  18.2, 21.5, 47.9, 70.5, 80.3, 124.5, 127.1, 128.0, 128.7, 129.3, 129.5, 133.6, 135.4, 141.8, 144.1, 155.8; MS (ESI)  $m/z$  353.1 ( $\text{M}^+ + \text{H}$ ); HRMS (ESI) calcd. for  $\text{C}_{20}\text{H}_{21}\text{N}_2\text{O}_2\text{S}^+$ : 353.1318, Found: 353.1318.

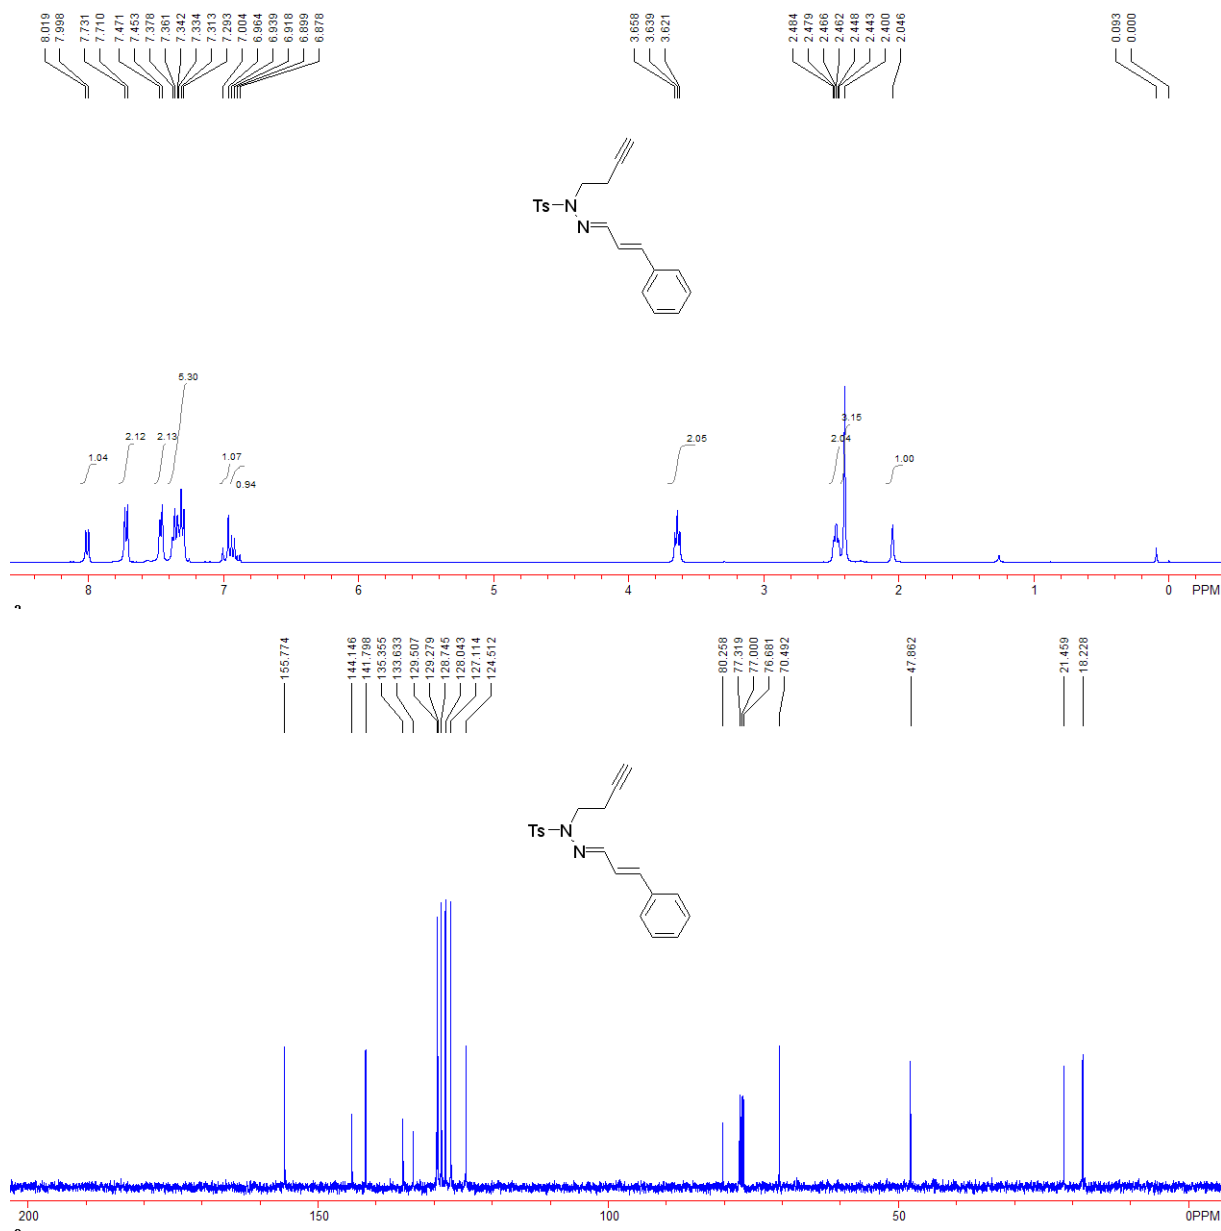

Compound **11k**: a colorless oil; IR (neat)  $\nu$  2977, 2938, 1677, 1627, 1582, 1493, 1450, 1332, 1149, 1131, 1032  $\text{cm}^{-1}$ ;  $^1\text{H}$  NMR ( $\text{CDCl}_3$ , 400 MHz, TMS)  $\delta$  1.33 (6H, d,  $J = 6.8$  Hz), 1.39

(3H, t,  $J = 7.6$  Hz), 3.11 (2H, q,  $J = 7.6$  Hz), 4.44–4.53 (1H, m), 6.89–6.99 (2H, m), 7.30–7.39 (3H, m), 7.47–7.49 (2H, m), 8.24 (1H, d,  $J = 7.6$  Hz);  $^{13}\text{C}$  NMR ( $\text{CDCl}_3$ , 100 MHz, TMS)  $\delta$  7.7, 20.9, 45.6, 52.0, 125.3, 127.1, 128.8, 129.2, 135.6, 141.2, 157.5; MS (ESI)  $m/z$  281.1 ( $\text{M}^+ + \text{H}$ ); HRMS (ESI) calcd. for  $\text{C}_{14}\text{H}_{20}\text{N}_2\text{O}_2\text{S}^+$ :280.1245, Found: 280.1236.

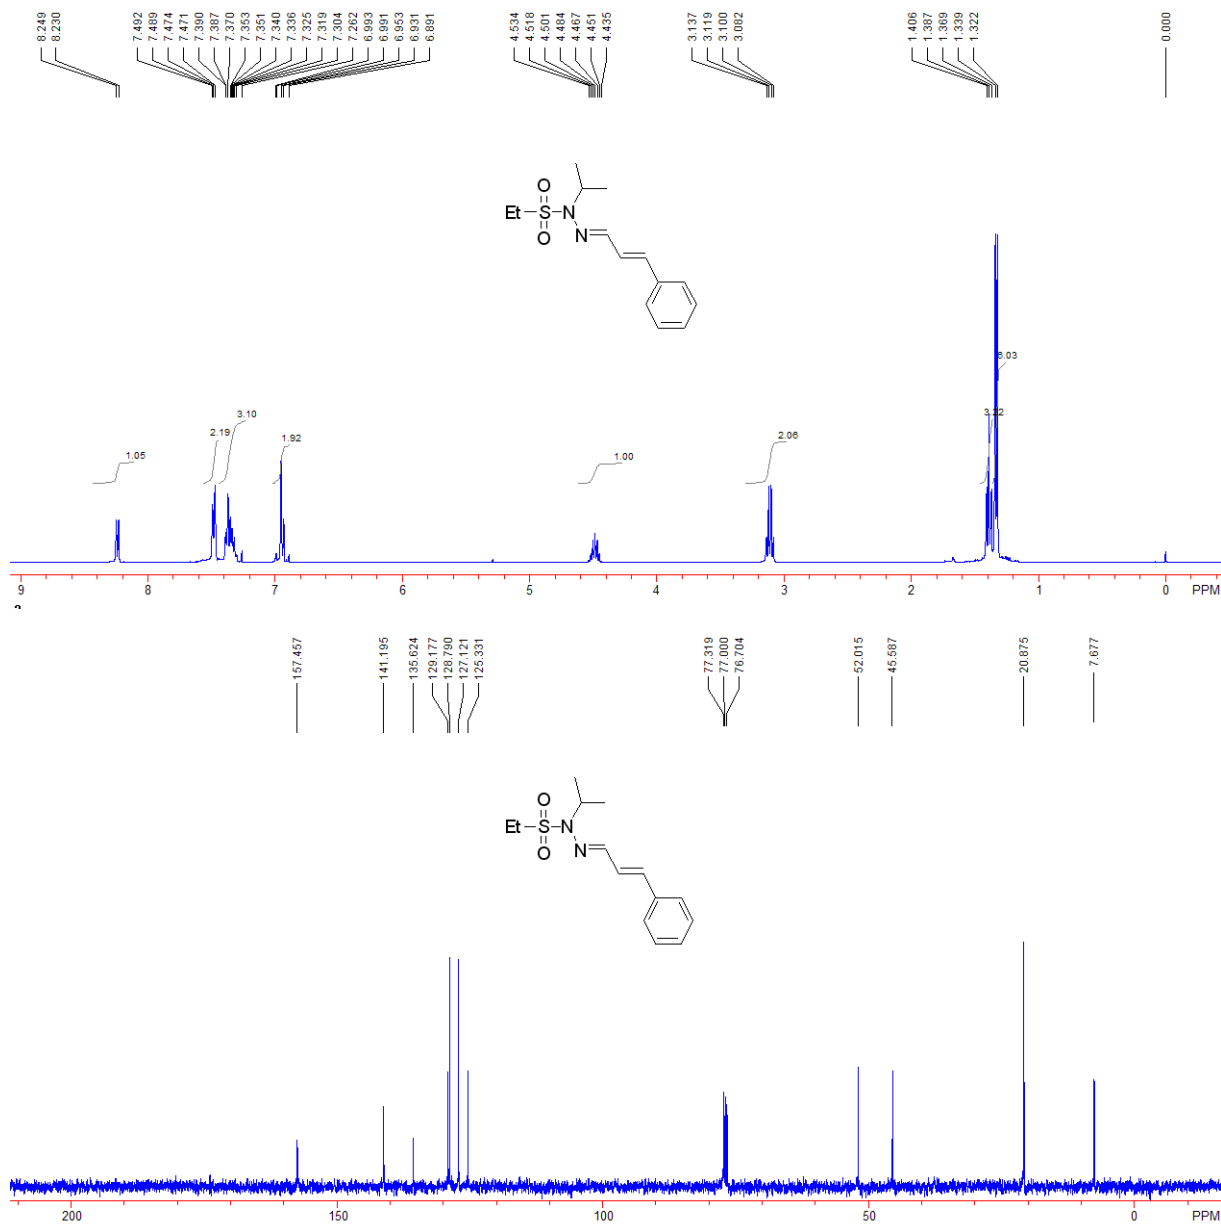

Compound **1a**: Prepared according to the general method (2.0 mmol PhI=NNs) and the title compound was isolated as a white solid (603 mg, 59% yield); a white solid; mp. 163–165 °C;

IR (neat)  $\nu$  2925, 1533, 1458, 1351, 1309, 1167, 1089, 939  $\text{cm}^{-1}$ ;  $^1\text{H}$  NMR ( $\text{CDCl}_3$ , 400 MHz, TMS)  $\delta$  2.44 (3H, s), 3.25 (3H, s), 3.74 (1H, dd,  $J = 4.0, 8.0$  Hz), 4.22 (1H, d,  $J = 4.0$  Hz), 7.13 (1H, d,  $J = 8.0$  Hz), 7.15–7.17 (2H, m), 7.30–7.33 (5H, m), 7.74–7.46 (2H, m), 8.04–8.07 (2H, m), 8.28–8.31 (2H, m);  $^{13}\text{C}$  NMR ( $\text{CDCl}_3$ , 100 MHz, TMS)  $\delta$  21.6, 33.0, 48.3, 53.3, 124.4, 126.2, 127.9, 128.7, 128.9, 129.1, 129.7, 132.9, 133.6, 136.7, 144.47, 144.54, 150.5; MS (ESI)  $m/z$  515.1 ( $\text{M}^+\text{H}$ ); HRMS (ESI) calcd. for  $\text{C}_{23}\text{H}_{23}\text{N}_4\text{O}_6\text{S}_2^{+1}$ : 515.1054, Found: 515.1053.

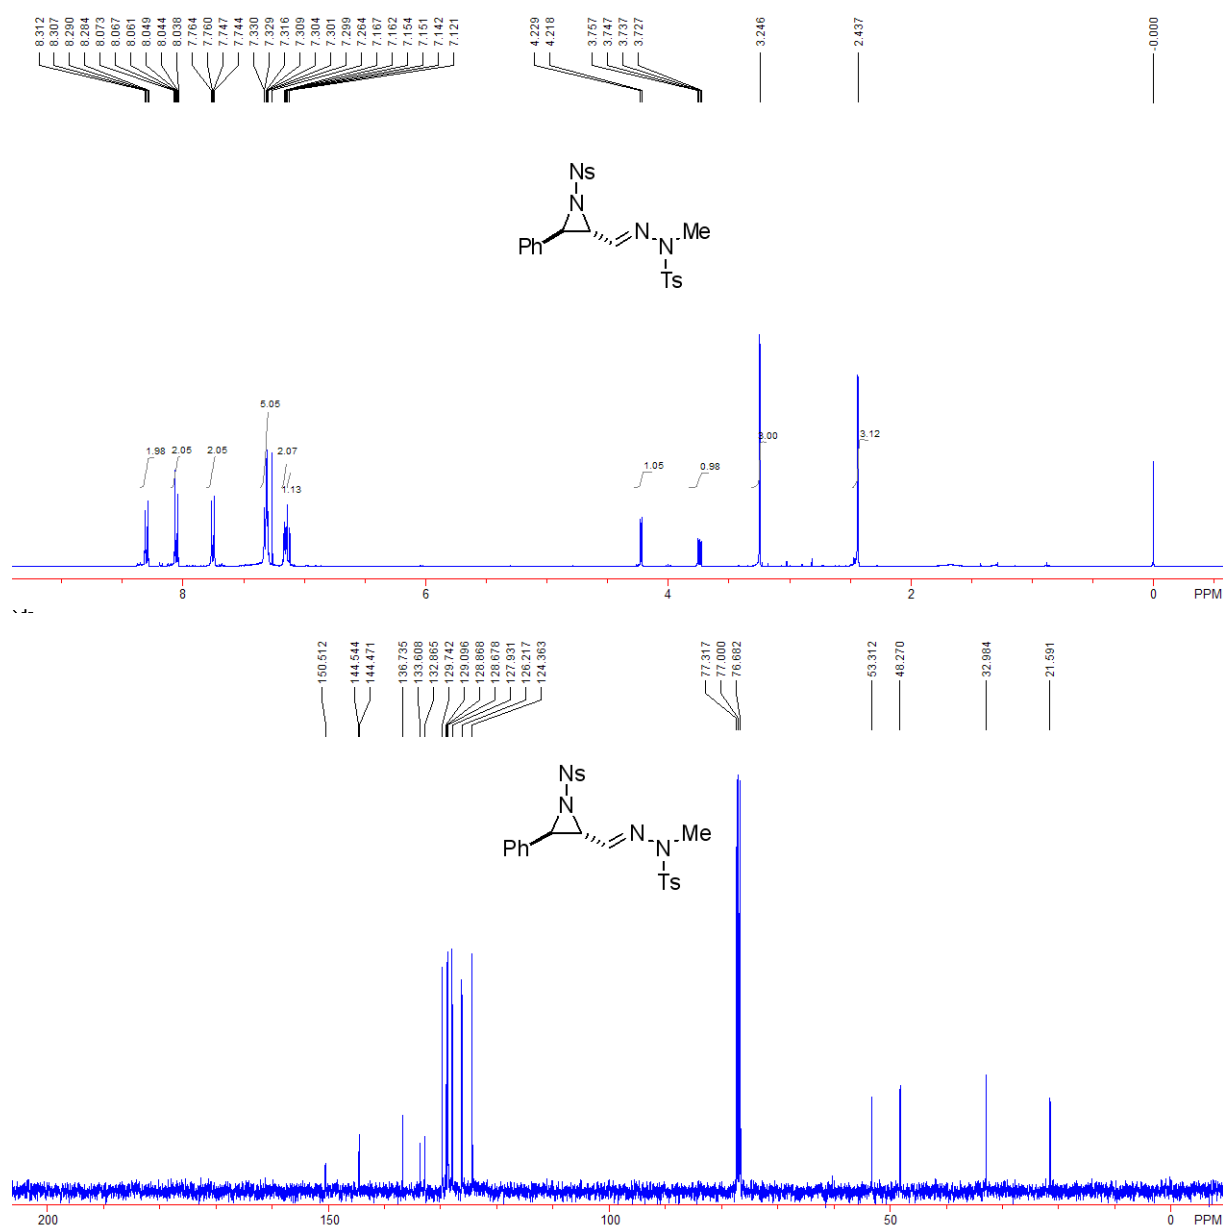



Compound **1b** (insoluble in various solvents, such as  $\text{CHCl}_3$ ,  $\text{CH}_2\text{Cl}_2$ , acetone, methanol, and DMSO): Prepared according to the general method (1.5 mmol  $\text{PhI}=\text{NNs}$ ) and the title compound was isolated as a white solid (250 mg, 30% yield); mp. 168–170 °C; IR (neat)  $\nu$  2925, 1598, 1532, 1494, 1350, 1310, 1166, 1089, 1015, 924  $\text{cm}^{-1}$ ; MS (ESI)  $m/z$  570.8 ( $\text{M}^+ + \text{Na}$ ); HRMS (ESI) calcd. for  $\text{C}_{23}\text{H}_{21}\text{N}_4\text{O}_6\text{S}_2\text{ClNa}^+$ : 571.0483, Found: 571.0503.

Compound **1c** (insoluble in various solvents, such as  $\text{CHCl}_3$ ,  $\text{CH}_2\text{Cl}_2$ , acetone, methanol, and DMSO): Prepared according to the general method (1.5 mmol  $\text{PhI}=\text{NNs}$ ) and the title compound was isolated as a white solid (303 mg, 38% yield); mp. 170–172 °C; IR (neat)  $\nu$  2956, 1598, 1531, 1349, 1309, 1164, 1088, 921  $\text{cm}^{-1}$ ; MS (ESI)  $m/z$  551.0 ( $\text{M}^+ + \text{Na}$ ); HRMS (ESI) calcd. for  $\text{C}_{24}\text{H}_{24}\text{N}_4\text{O}_6\text{S}_2\text{Na}^+$ : 551.1030, Found: 551.1040.

Compound **1d**: Prepared according to the general method (1.5 mmol  $\text{PhI}=\text{NNs}$ ) and the title compound was isolated as a white solid (304 mg, 34% yield); mp. 192–194 °C; IR (neat)  $\nu$  2924, 2852, 1607, 1598, 1532, 1464, 1350, 1310, 1167, 1089, 934  $\text{cm}^{-1}$ ;  $^1\text{H}$  NMR ( $\text{CDCl}_3$ , 400 MHz, TMS)  $\delta$  2.45 (3H, s), 3.25 (3H, s), 3.62 (1H, dd,  $J = 4.4, 8.0$  Hz), 4.47 (1H, d,  $J = 4.4$  Hz), 6.93 (1H, dd,  $J = 3.0, 7.2$  Hz), 7.16–7.21 (3H, m), 7.32 (2H, d,  $J = 8.0$  Hz), 7.52–7.55 (1H, m), 7.75 (2H, d,  $J = 8.0$  Hz), 8.12 (2H, d,  $J = 9.2$  Hz), 8.36 (2H, d,  $J = 9.2$  Hz);  $^{13}\text{C}$  NMR ( $\text{CDCl}_3$ , 100 MHz, TMS)  $\delta$  21.5, 33.1, 48.1, 52.5, 123.2, 124.4, 127.0, 127.8, 128.9, 129.6, 129.9, 130.2, 132.5, 132.7, 133.3, 136.5, 144.1, 144.4, 150.6; MS (ESI)  $m/z$  614.8 ( $\text{M}^+ + \text{Na}$ );

HRMS (ESI) calcd. for  $C_{23}H_{21}N_4O_6S_2BrNa^{+1}$ : 614.9978, Found: 614.9990.

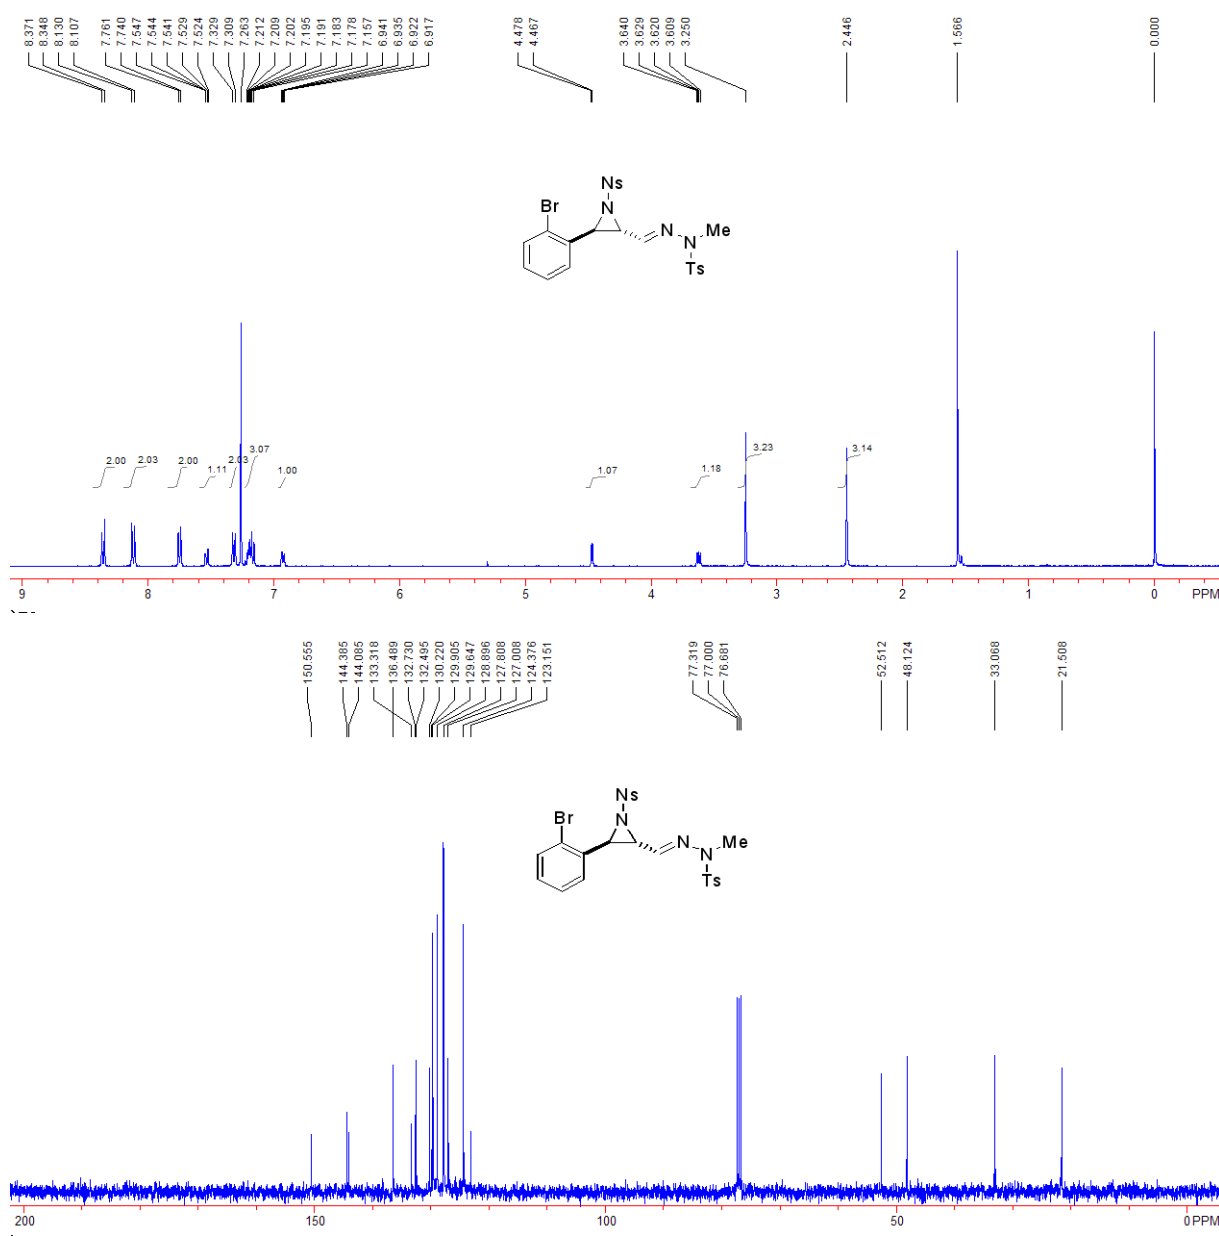

Compound **1e**: Prepared according to the general method (1.5 mmol PhI=NNs) and the title compound was isolated as a white solid (281 mg, 34% yield); mp. 144–146 °C; IR (neat)  $\nu$  2926, 1604, 1532, 1494, 1465, 1350, 1310, 1166, 1089, 1044, 920  $cm^{-1}$ ;  $^1H$  NMR ( $CDCl_3$ , 400 MHz, TMS)  $\delta$  2.42 (3H, s), 3.24 (3H, s), 3.72 (1H, dd,  $J = 4.0, 8.0$  Hz), 3.74 (3H, s), 4.21

(1H, d,  $J = 4.0$  Hz), 6.66 (1H, s), 6.75 (1H, d,  $J = 7.2$  Hz), 6.82 (1H, dd,  $J = 2.4, 8.0$  Hz), 7.13 (1H, d,  $J = 7.6$  Hz), 7.20 (1H, t,  $J = 8.0$  Hz), 7.31 (2H, d,  $J = 8.0$  Hz), 7.75 (2H, d,  $J = 8.0$  Hz), 8.05 (2H, d,  $J = 8.8$  Hz), 8.28 (2H, d,  $J = 8.8$  Hz);  $^{13}\text{C}$  NMR ( $\text{CDCl}_3$ , 100 MHz, TMS)  $\delta$  21.5, 32.9, 48.0, 53.2, 55.2, 111.6, 114.3, 118.5, 124.3, 127.8, 128.6, 129.7, 129.9, 133.5, 134.4, 136.8, 144.4, 150.4, 159.8; MS (ESI)  $m/z$  567.0 ( $\text{M}^+ + \text{Na}$ ); HRMS (ESI) calcd. for  $\text{C}_{24}\text{H}_{24}\text{N}_4\text{O}_7\text{S}_2\text{Na}^+$ : 567.0979, Found: 567.0967.

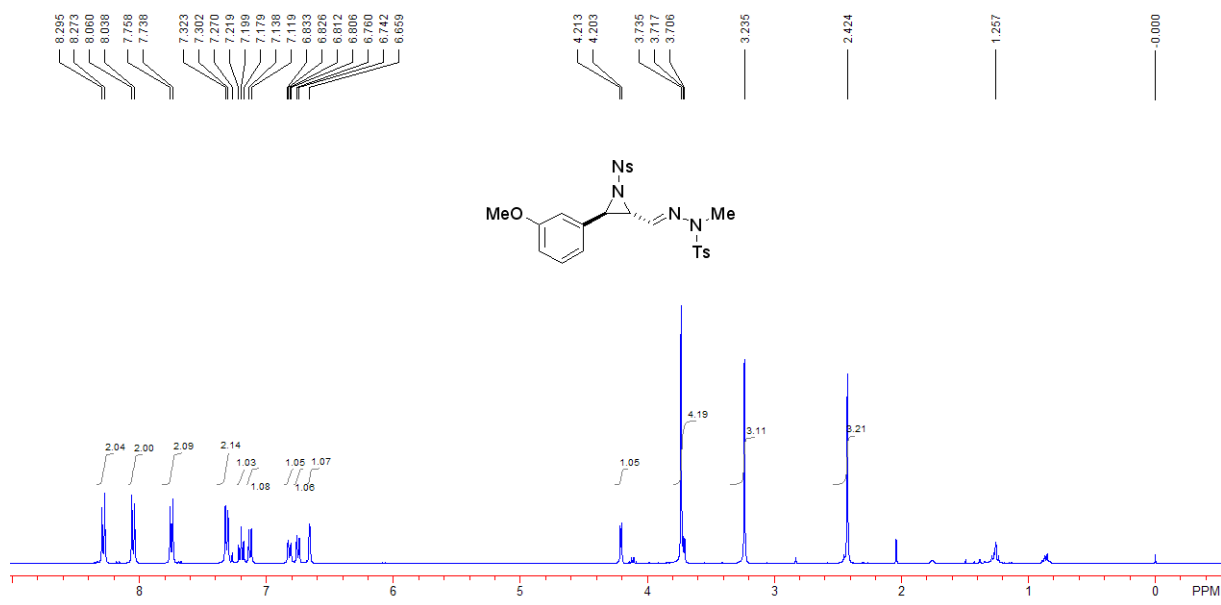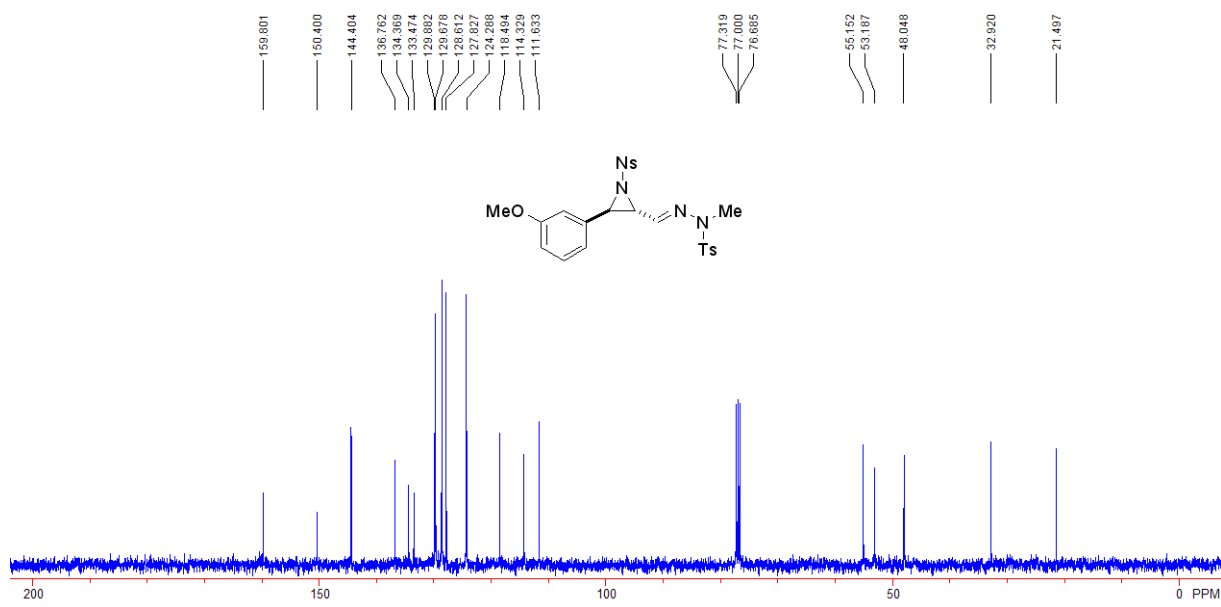

Compound **1f**: Prepared according to the general method (1.0 mmol PhI=NNs) and the title compound was isolated as a yellow oil (186 mg, 30% yield); IR (neat)  $\nu$  2954, 2923, 2852, 1733, 1595, 1531, 1491, 1462, 1400, 1349, 1308, 1251, 1164, 1088, 1024  $\text{cm}^{-1}$ ;  $^1\text{H}$  NMR ( $\text{CDCl}_3$ , 400 MHz, TMS)  $\delta$  2.43 (3H, s), 3.24 (3H, s), 3.67 (1H, dd,  $J = 4.0, 8.0$  Hz), 3.77 (3H, s), 4.48 (1H, d,  $J = 4.0$  Hz), 6.77 (1H, d,  $J = 8.4$  Hz), 6.96–6.97 (2H, m), 7.15 (1H, d,  $J = 8.0$  Hz), 7.32 (2H, d,  $J = 8.0$  Hz), 7.75 (2H, d,  $J = 8.0$  Hz), 8.05 (2H, d,  $J = 8.8$  Hz), 8.29 (2H, d,  $J = 8.8$  Hz);  $^{13}\text{C}$  NMR ( $\text{CDCl}_3$ , 100 MHz, TMS)  $\delta$  21.5, 32.9, 43.7, 52.1, 55.7, 114.0, 120.5, 123.4, 123.7, 124.2, 127.1, 127.8, 128.7, 129.6, 133.5, 137.1, 144.3, 150.4, 158.4; MS (ESI)  $m/z$  644.9 ( $\text{M}^+ + \text{Na}$ ); HRMS (ESI) calcd. for  $\text{C}_{24}\text{H}_{23}\text{N}_4\text{O}_7\text{S}_2\text{BrNa}^{+1}$ : 645.0084, Found: 645.0101.

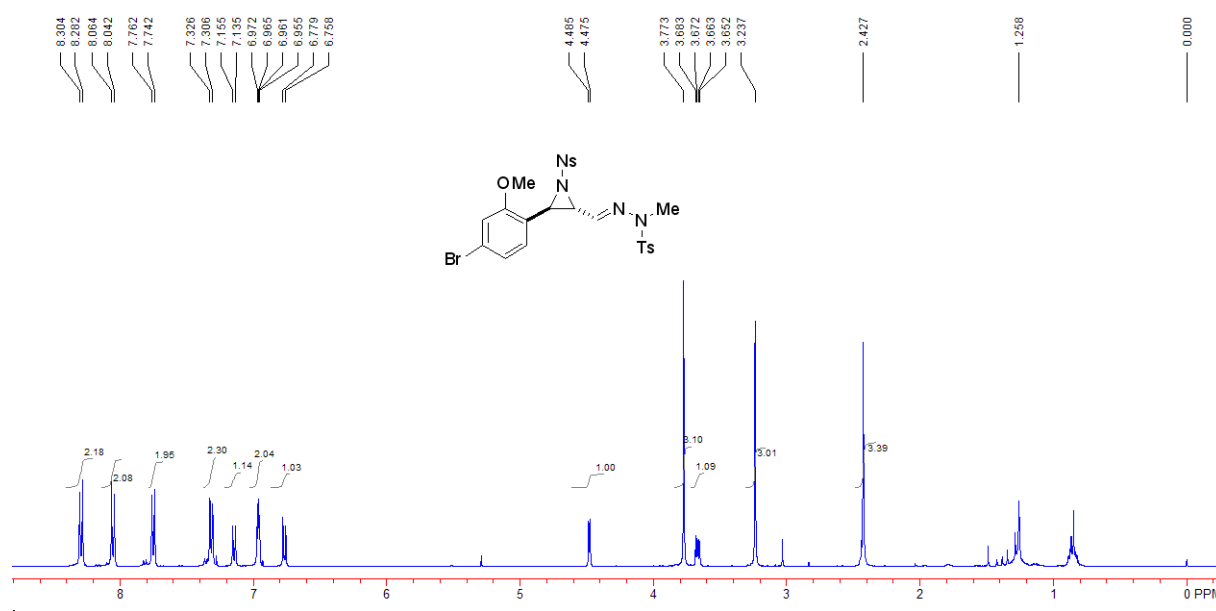

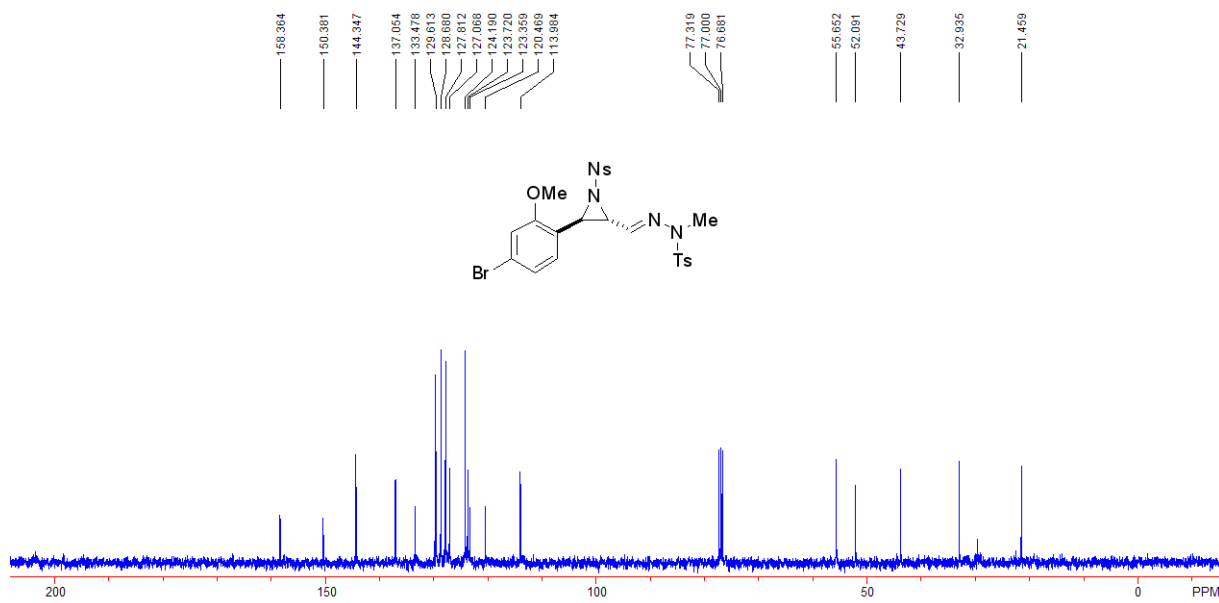

Compound **1g** (*trans/cis*-isomer = 10/1): Prepared according to the general method (2.0 mmol PhI=NNs) and the title compound was isolated as a yellow oil (447 mg, 47% yield); IR (neat)  $\nu$  2960, 2927, 1597, 1530, 1463, 1349, 1306, 1267, 1219, 1162, 1088, 1013  $\text{cm}^{-1}$ ;  $^1\text{H}$  NMR ( $\text{CDCl}_3$ , 400 MHz, TMS) (*trans*-isomer)  $\delta$  0.88 (3H, t,  $J = 7.2$  Hz), 1.29–1.36 (2H, m), 1.53–1.58 (1H, m), 1.65–1.71 (1H, m), 2.46 (3H, s), 3.15 (3H, s), 3.15–3.19 (1H, m), 3.49 (1H, dd,  $J = 4.4, 8.0$  Hz), 6.87 (1H, d,  $J = 7.6$  Hz), 7.33 (2H, d,  $J = 8.0$  Hz), 7.75 (2H, d,  $J = 8.0$ ), 8.02–8.04 (2H, m), 8.30–8.33 (2H, m);  $^{13}\text{C}$  NMR ( $\text{CDCl}_3$ , 100 MHz, TMS)  $\delta$  13.1, 19.7, 21.1, 31.7, 32.6, 47.7, 49.8, 123.9, 127.5, 128.3, 129.3, 132.9, 138.3, 144.1, 144.4, 150.0; MS (ESI)  $m/z$  481.0 ( $\text{M}^+ + \text{H}$ ); HRMS (ESI) calcd. for  $\text{C}_{20}\text{H}_{24}\text{N}_4\text{O}_6\text{S}_2\text{Na}^{+1}$ : 503.1030, Found: 503.1044.

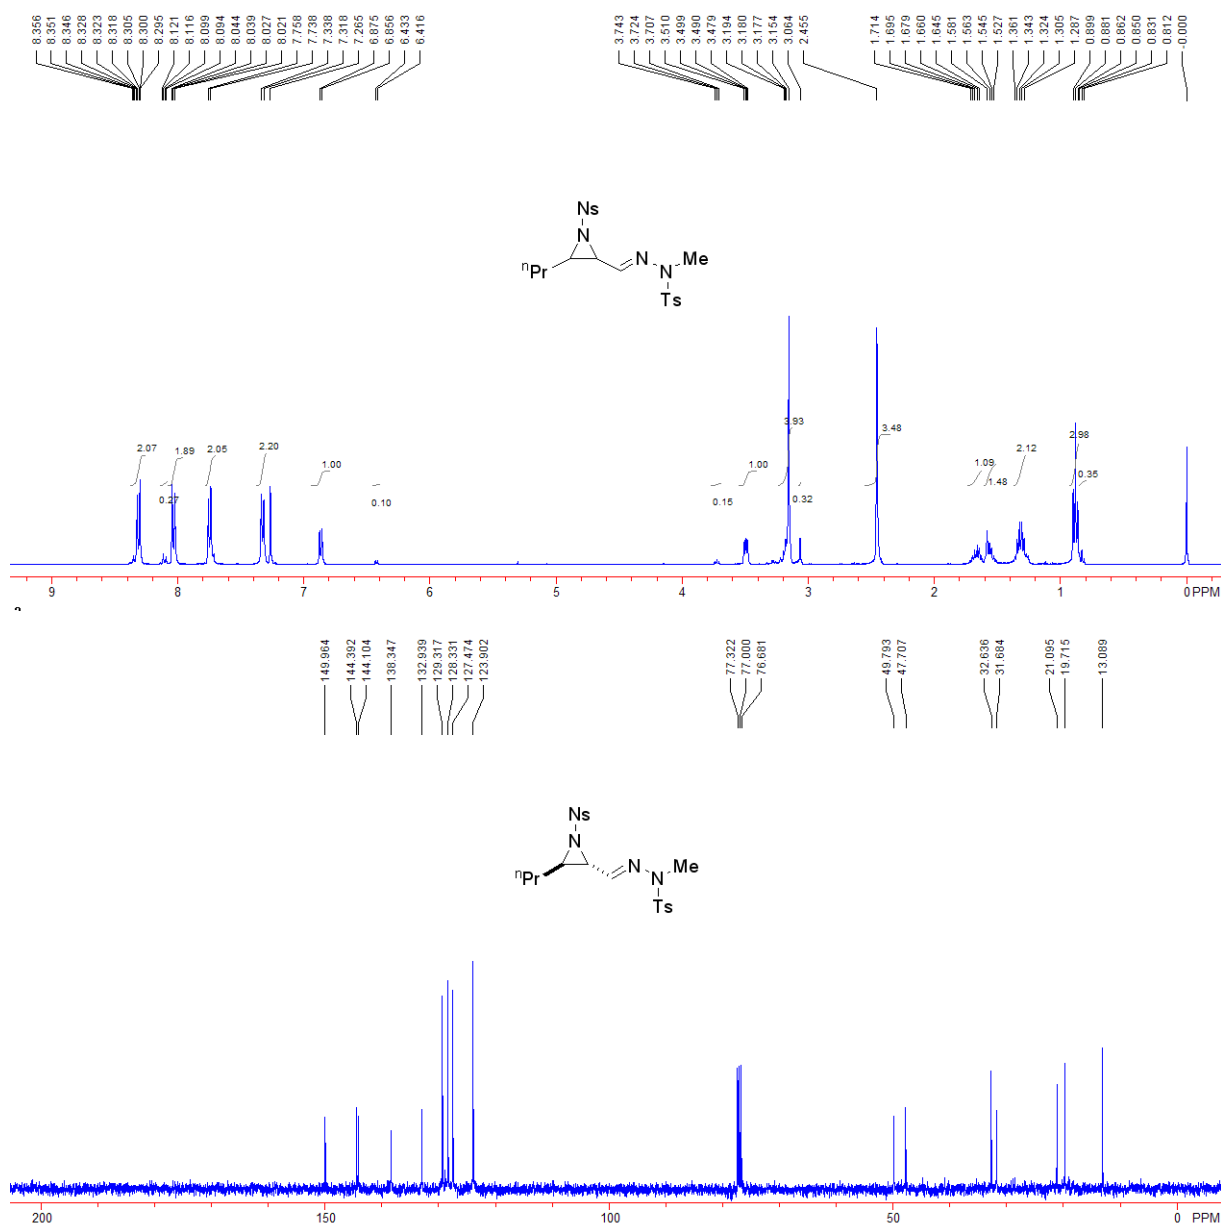

Compound **1h**: Prepared according to the general method (1.5 mmol PhI=NNs) and the title compound was isolated as a white solid (331 mg, 37% yield); mp. 72–75 °C; IR (neat): 2959, 2924, 2853, 1607, 1530, 1495, 1455, 1349, 1308, 1261, 1163, 1089, 1026, 1015 cm<sup>-1</sup>; <sup>1</sup>H NMR (CDCl<sub>3</sub>, 400 MHz, TMS) δ 2.46 (3H, s), 3.56 (1H, dd, *J* = 4.0, 8.0 Hz), 4.02 (1H, d, *J* = 4.0 Hz), 4.83 (1H, d, *J* = 16.4 Hz), 4.97 (1H, d, *J* = 16.4 Hz), 7.09–7.12 (2H, m), 7.21 (1H, d, *J* = 8.0 Hz), 7.28–7.29 (3H, m), 7.33–7.37 (3H, m), 7.41–7.43 (4H, m), 7.81–7.86 (4H, m),

8.23 (2H, d,  $J = 8.8$  Hz);  $^{13}\text{C}$  NMR ( $\text{CDCl}_3$ , 100 MHz, TMS)  $\delta$  21.6, 47.5, 51.6, 53.1, 124.2, 126.2, 127.1, 127.9, 128.0, 128.70, 128.74, 129.0, 129.8, 132.9, 134.5, 134.6, 137.1, 144.2, 144.5, 150.4; MS (ESI)  $m/z$  613.0 ( $\text{M}^+\text{Na}$ ); HRMS (ESI) calcd. for  $\text{C}_{29}\text{H}_{27}\text{N}_4\text{O}_6\text{S}_2^{+1}$ : 591.1367, Found: 591.1367.

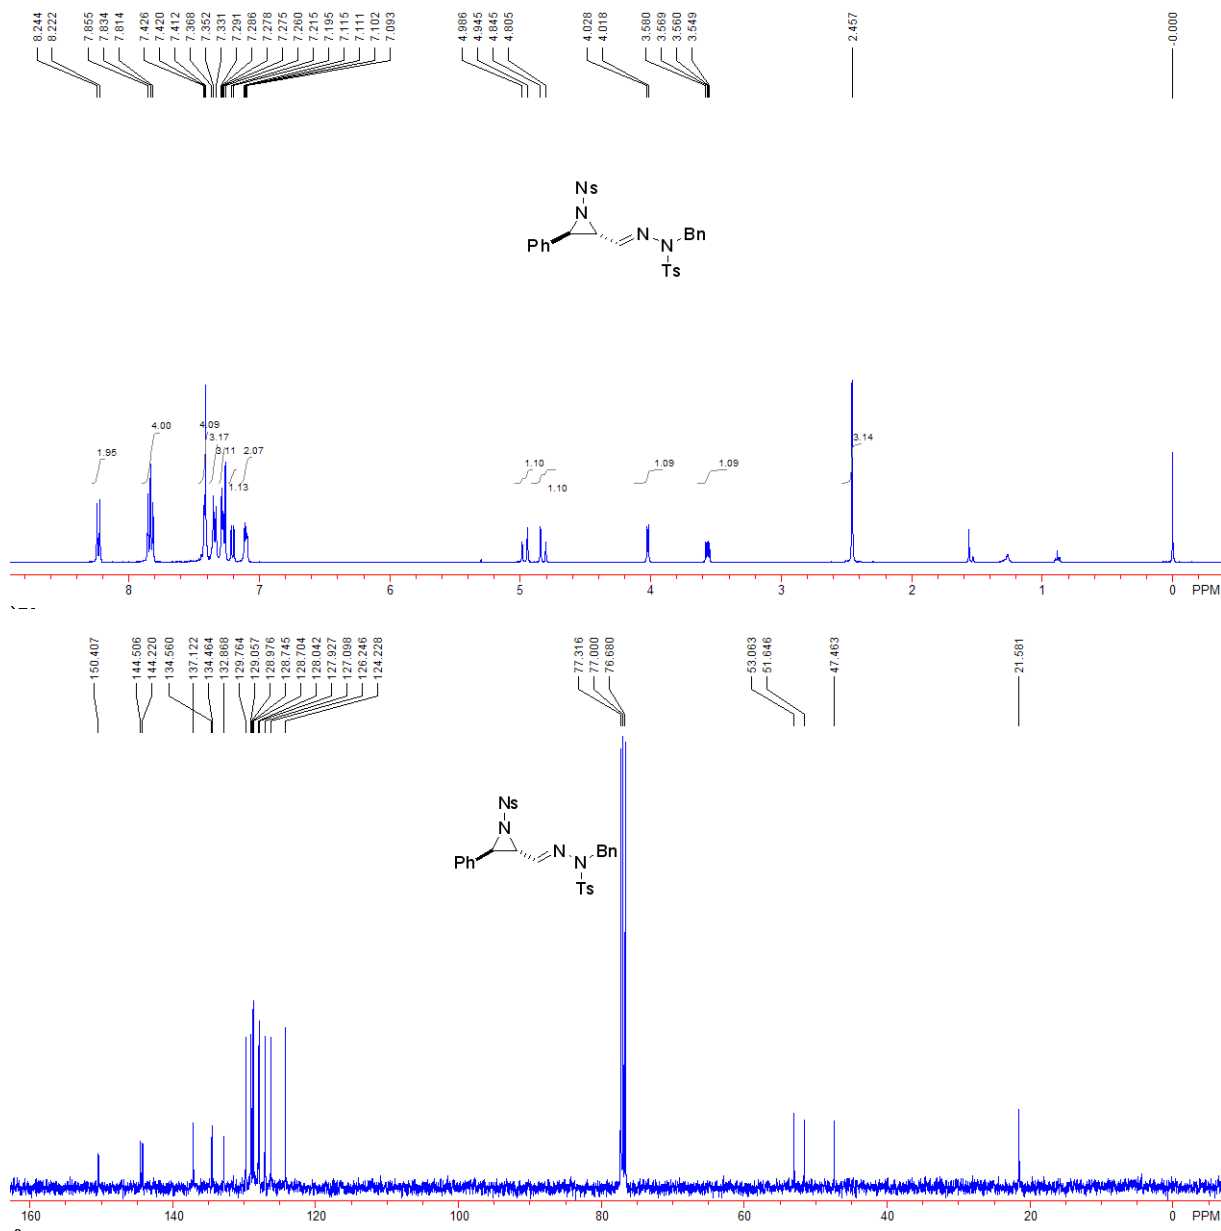

Compound **1i**: Prepared according to the general method (1.0 mmol PhI=NNs) and the title

compound was isolated as a white solid (221 mg, 40% yield); mp. 177–179 °C; IR (neat)  $\nu$  2924, 1598, 1532, 1350, 1309, 1166, 1090, 1042, 903  $\text{cm}^{-1}$ ;  $^1\text{H}$  NMR ( $\text{CDCl}_3$ , 400 MHz, TMS)  $\delta$  1.62 (3H, s), 2.43 (3H, s), 3.70 (1H, dd,  $J = 4.0, 8.0$  Hz), 4.26 (1H, d,  $J = 4.0$  Hz), 4.47 (1H, dd,  $J = 2.0, 18.4$  Hz), 4.75 (1H, dd,  $J = 2.0, 18.4$  Hz), 7.16–7.17 (2H, m), 7.27–7.32 (5H, m), 7.41 (1H, d,  $J = 8.0$  Hz), 7.81 (2H, d,  $J = 8.0$  Hz), 8.07 (2H, d,  $J = 8.8$  Hz), 8.27 (2H, d,  $J = 8.8$  Hz);  $^{13}\text{C}$  NMR ( $\text{CDCl}_3$ , 100 MHz, TMS)  $\delta$  3.32, 21.5, 35.9, 47.8, 53.2, 69.3, 83.6, 124.3, 126.2, 128.3, 128.7, 128.8, 129.0, 129.4, 132.9, 134.5, 137.8, 144.4, 144.5, 150.4; MS (ESI)  $m/z$  553.1 ( $\text{M}^+ + \text{H}$ ); HRMS (ESI) calcd. for  $\text{C}_{26}\text{H}_{25}\text{N}_4\text{O}_6\text{S}_2$  $^{+1}$ : 553.1210, Found: 553.1225.

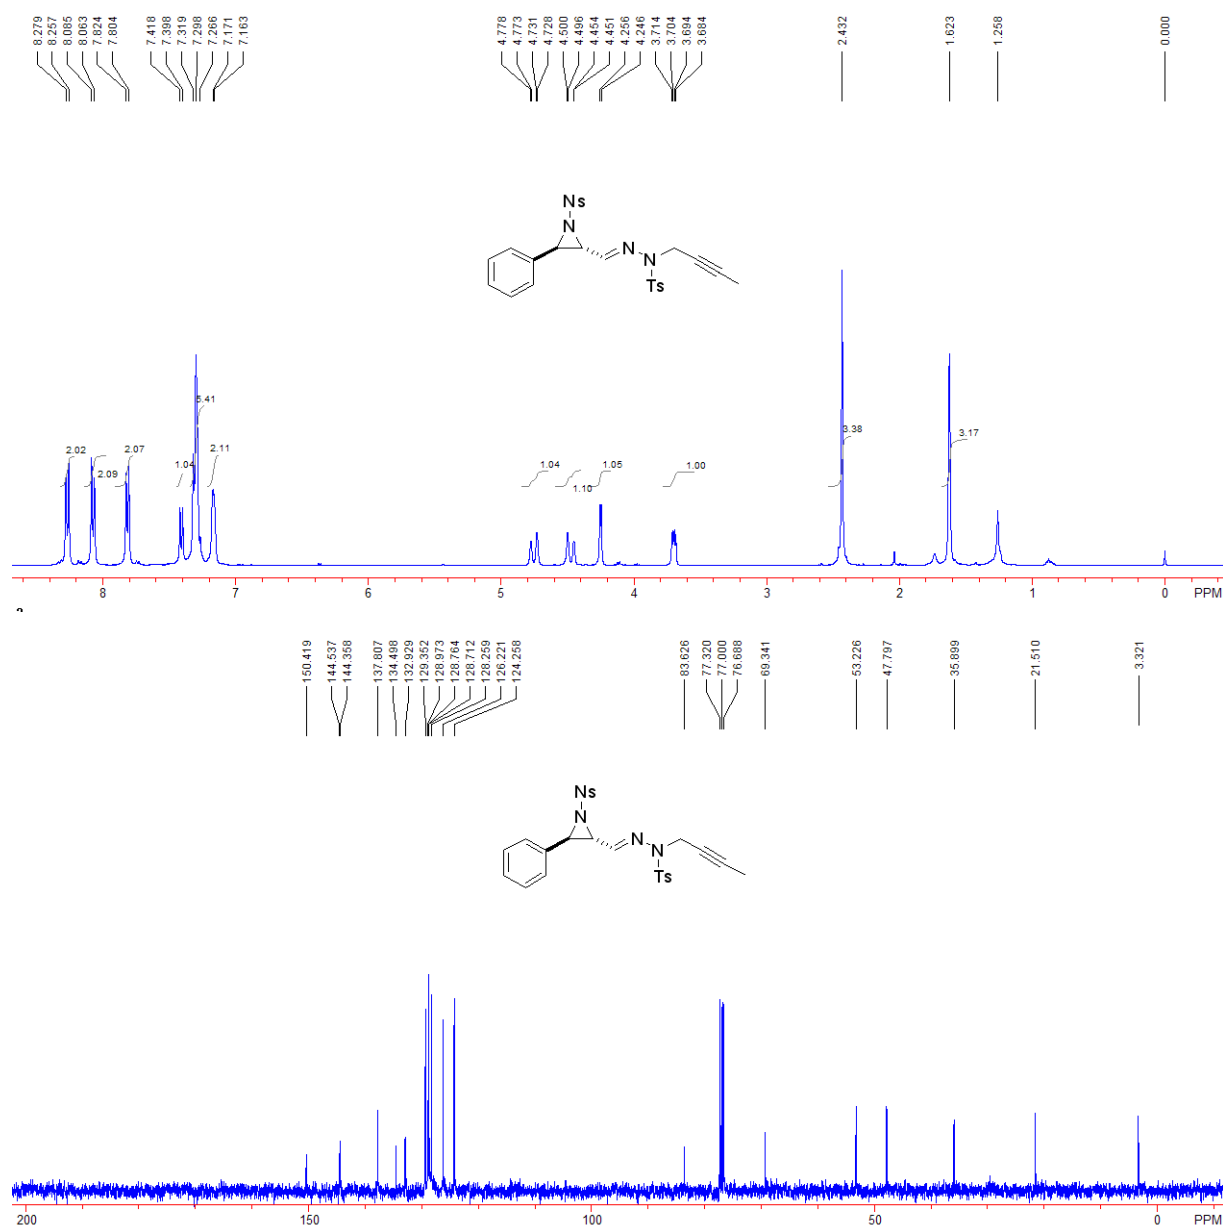



Compound **1j**: Prepared according to the general method (1.3 mmol PhI=NNs) and the title compound was isolated as a yellow oil (355 mg, 49% yield); IR (neat)  $\nu$  3291, 2925, 1606, 1598, 1532, 1456, 1350, 1310, 1165, 1091, 930  $\text{cm}^{-1}$ ;  $^1\text{H}$  NMR ( $\text{CDCl}_3$ , 400 MHz, TMS)  $\delta$  2.10 (1H, t,  $J = 2.4$  Hz), 2.41 (3H, s), 2.48–2.65 (2H, m), 3.68 (1H, dd,  $J = 4.0, 8.0$  Hz), 3.77–3.85 (1H, m), 3.97–4.05 (1H, m), 4.31 (1H, d,  $J = 8.0$  Hz), 7.16–7.18 (2H, m), 7.27–7.32 (5H, m), 7.46 (1H, d,  $J = 7.6$  Hz), 7.77–7.80 (2H, m), 8.05–8.08 (2H, m), 8.26–8.29 (2H, m);  $^{13}\text{C}$  NMR ( $\text{CDCl}_3$ , 100 MHz, TMS)  $\delta$  17.5, 21.4, 45.8, 47.9, 52.9, 71.0, 79.9, 124.2, 126.1, 127.8, 128.6, 128.7, 128.9, 129.6, 132.8, 134.3, 138.6, 144.3, 144.4, 150.3; MS (ESI)  $m/z$  553.0 ( $\text{M}^++\text{H}$ ); HRMS (ESI) calcd. for  $\text{C}_{26}\text{H}_{25}\text{N}_4\text{O}_6\text{S}_2^{+1}$ : 553.1210, Found: 553.1226.

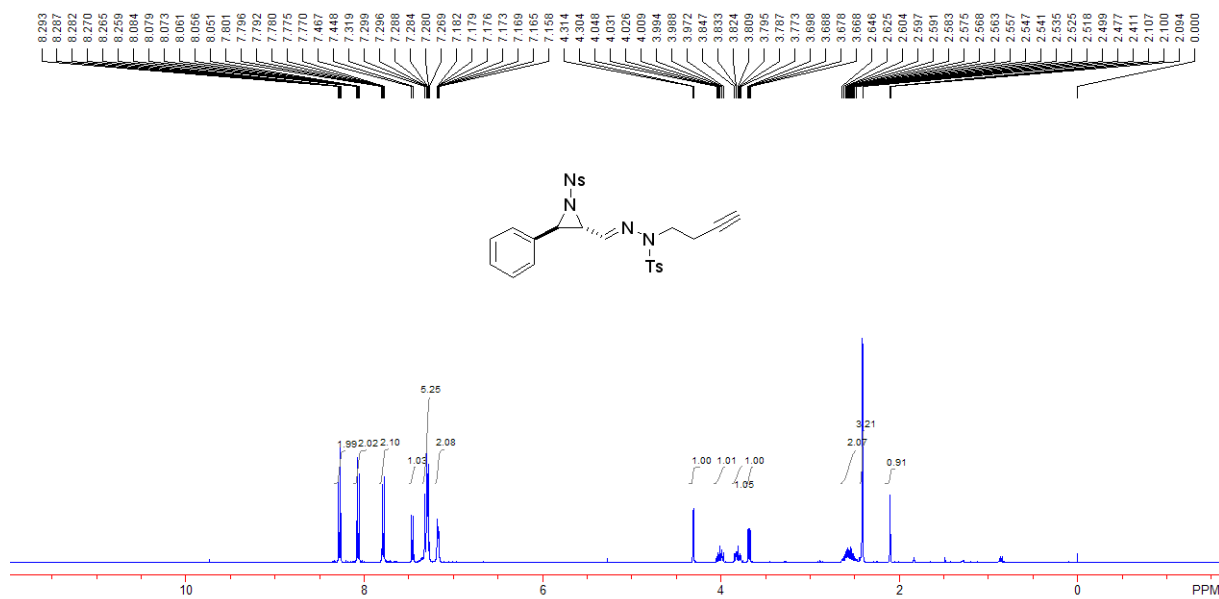

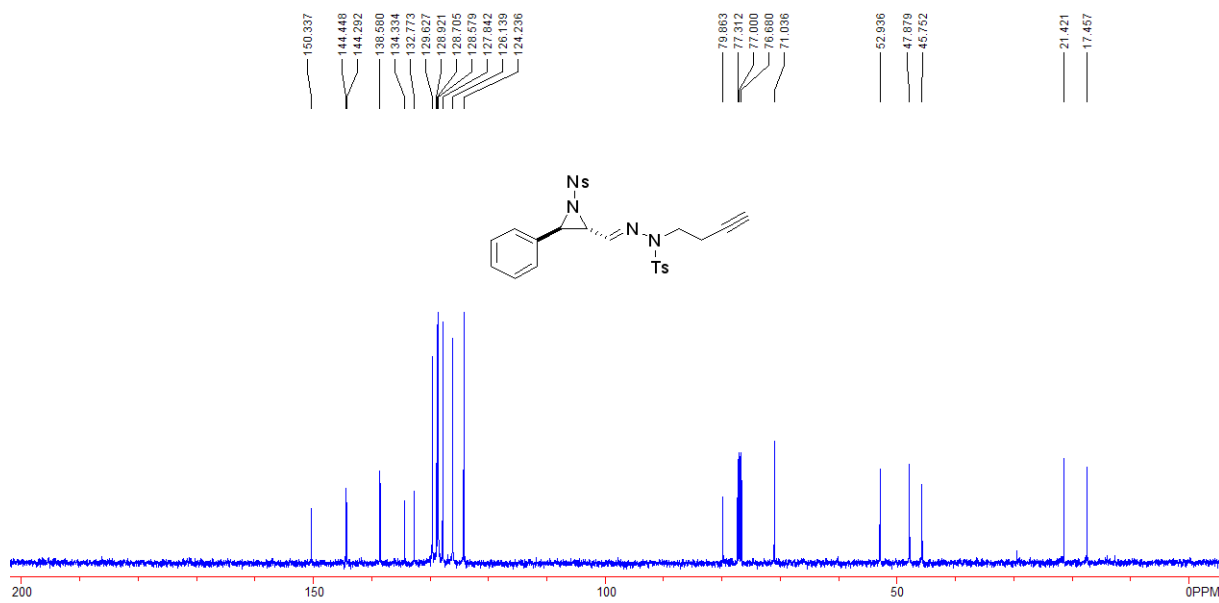

Compound **1k**: Prepared according to the general method (1.5 mmol PhI=NNs) and the title compound was isolated as a colorless oil (260 mg, 36% yield); IR (neat)  $\nu$  2960, 2926, 1688, 1607, 1529, 1496, 1456, 1348, 1311, 1163, 1090  $\text{cm}^{-1}$ ;  $^1\text{H}$  NMR ( $\text{CDCl}_3$ , 400 MHz, TMS)  $\delta$  1.38 (6H, d,  $J = 6.4$  Hz), 1.40 (3H, t,  $J = 7.2$  Hz), 3.16–3.25 (1H, m), 3.26–3.35 (1H, m), 3.69 (1H, dd,  $J = 4.0, 8.0$  Hz), 4.35 (1H, d,  $J = 4.0$  Hz), 4.55–4.65 (1H, m), 7.18–7.20 (2H, m), 7.30–7.32 (3H, m), 7.87 (1H, d,  $J = 8.0$  Hz), 8.13–8.16 (2H, m), 8.33–8.36 (2H, m);  $^{13}\text{C}$  NMR ( $\text{CDCl}_3$ , 100 MHz, TMS)  $\delta$  7.6, 20.8, 21.2, 46.0, 48.5, 52.2, 54.1, 124.4, 126.1, 128.6, 128.8, 129.0, 133.1, 139.2, 144.7, 150.5; MS (ESI)  $m/z$  481.0 ( $\text{M}^+ + \text{H}$ ); HRMS (ESI) calcd. for  $\text{C}_{20}\text{H}_{25}\text{N}_4\text{O}_6\text{S}_2^{+1}$ : 481.1210, Found: 481.1226.

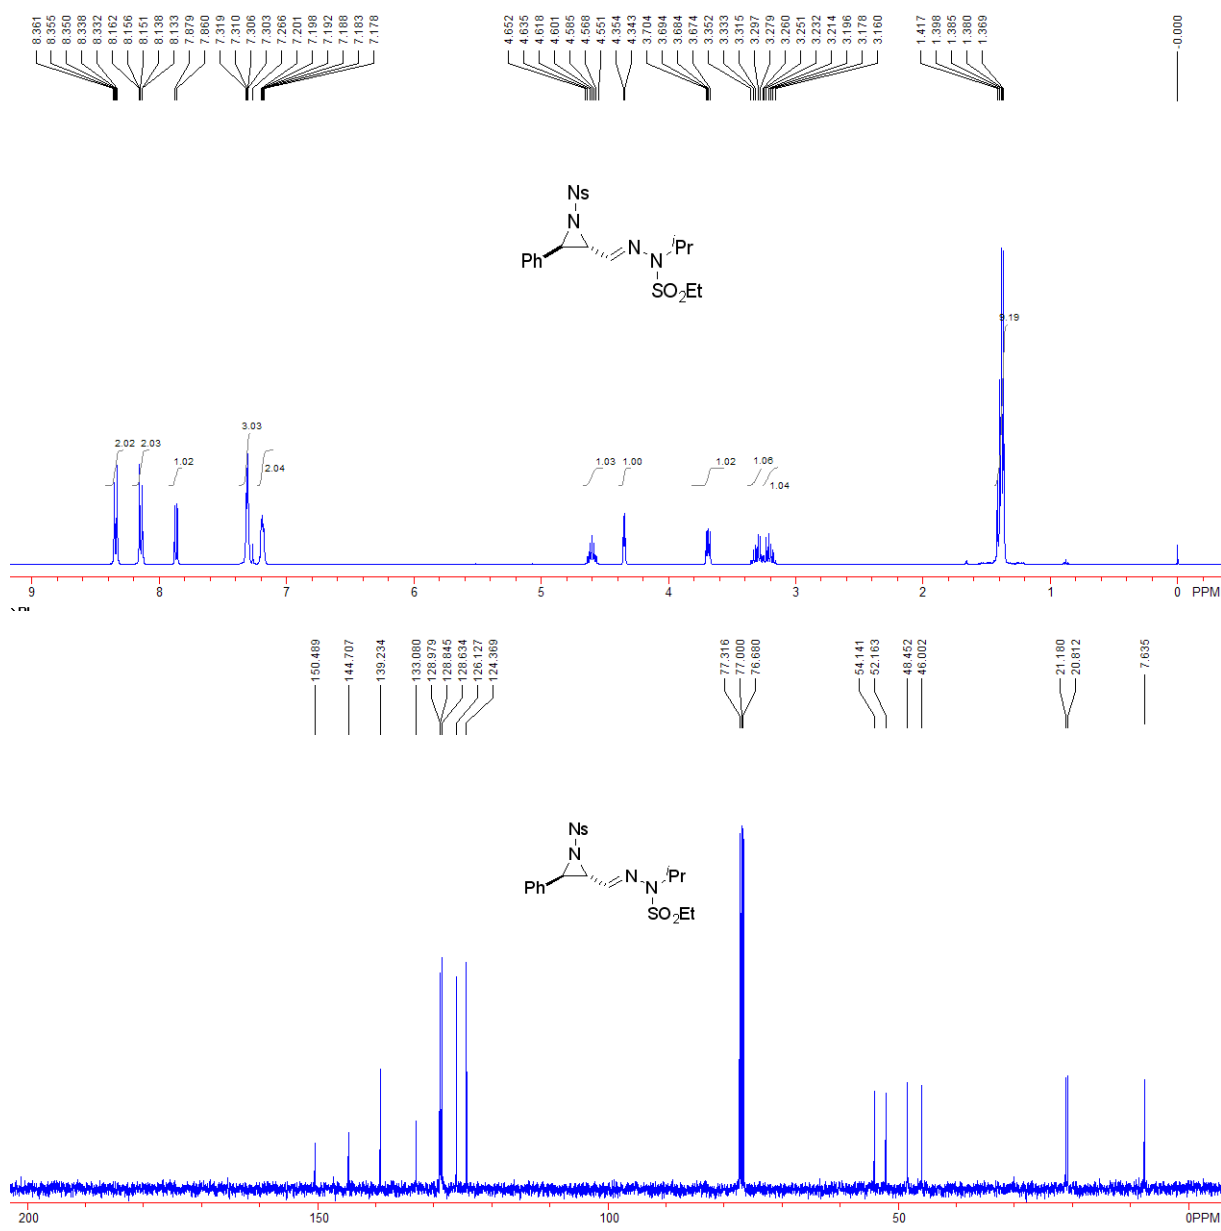

Compound **11**: Prepared according to the general method (1.5 mmol PhI=NNs) and the title compound was isolated as a white solid (105 mg, 15% yield); mp. 181–183 °C; IR (neat)  $\nu$  2924, 2854, 1726, 1629, 1606, 1530, 1346, 1304, 1165, 1107, 1086  $\text{cm}^{-1}$ ; <sup>1</sup>H NMR (CDCl<sub>3</sub>, 400 MHz, TMS)  $\delta$  3.84 (1H, dd,  $J = 4.0, 8.8$  Hz), 4.43 (1H, d,  $J = 4.0$  Hz), 7.22–7.25 (2H, m), 7.33–7.36 (3H, m), 7.81–7.84 (2H, m), 7.94–7.96 (2H, m), 8.19–8.22 (2H, m), 8.35–8.38

(2H, m), 9.30 (1H, d,  $J = 8.8$  Hz);  $^{13}\text{C}$  NMR ( $\text{CDCl}_3$ , 100 MHz, TMS)  $\delta$  48.3, 53.0, 124.1, 124.4, 126.4, 128.9, 129.0, 129.2, 129.8, 132.6, 135.0, 144.4, 150.6, 153.1, 164.6; MS (ESI)  $m/z$  499.1 ( $\text{M}^+ + \text{Na}$ ); HRMS (ESI) calcd. for  $\text{C}_{23}\text{H}_{16}\text{N}_4\text{O}_6\text{S}_2^{+1}$ : 476.0791, Found: 476.0787.

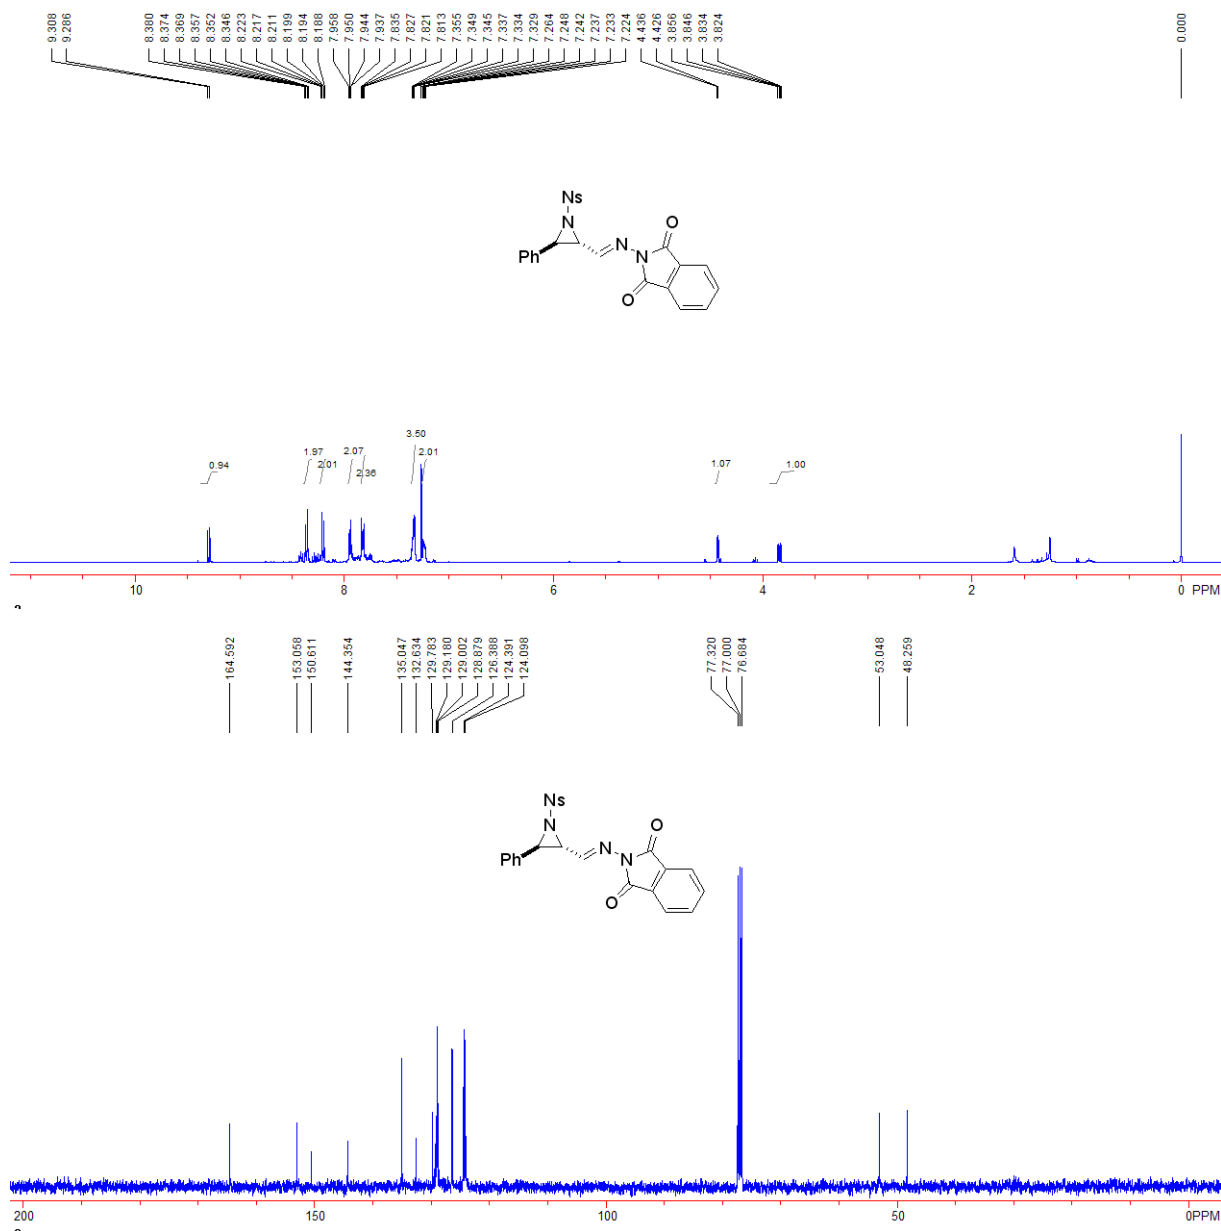

Compound **1m**: Prepared according to the general method (1.5 mmol  $\text{PhI}=\text{NNs}$ ) and the title compound was isolated as a white solid (160 mg, 30% yield); mp. 170–172 °C; IR (neat)  $\nu$  2928, 1606, 1531, 1458, 1402, 1349, 1309, 1165, 1085, 1037  $\text{cm}^{-1}$ ;  $^1\text{H}$  NMR ( $\text{CDCl}_3$ , 400 MHz, TMS)  $\delta$  3.60 (1H, dd,  $J = 4.0, 8.8$  Hz), 3.91 (3H, s), 4.23 (1H, d,  $J = 4.0$  Hz), 7.18–7.20

(2H, m), 7.30–7.32 (3H, m), 7.72 (1H, d,  $J = 8.8$  Hz), 8.14 (2H, d,  $J = 8.4$  Hz), 8.35 (2H, d,  $J = 8.4$  Hz);  $^{13}\text{C}$  NMR ( $\text{CDCl}_3$ , 100 MHz, TMS)  $\delta$  47.8, 50.1, 62.4, 124.3, 126.3, 128.8, 128.9, 129.0, 132.9, 143.5, 144.6, 150.5; MS (ESI)  $m/z$  362.1 ( $\text{M}^+\text{+H}$ ); HRMS (ESI) calcd. for  $\text{C}_{16}\text{H}_{16}\text{N}_3\text{O}_5\text{S}^{\text{+1}}$ : 361.0728, Found: 361.0732.

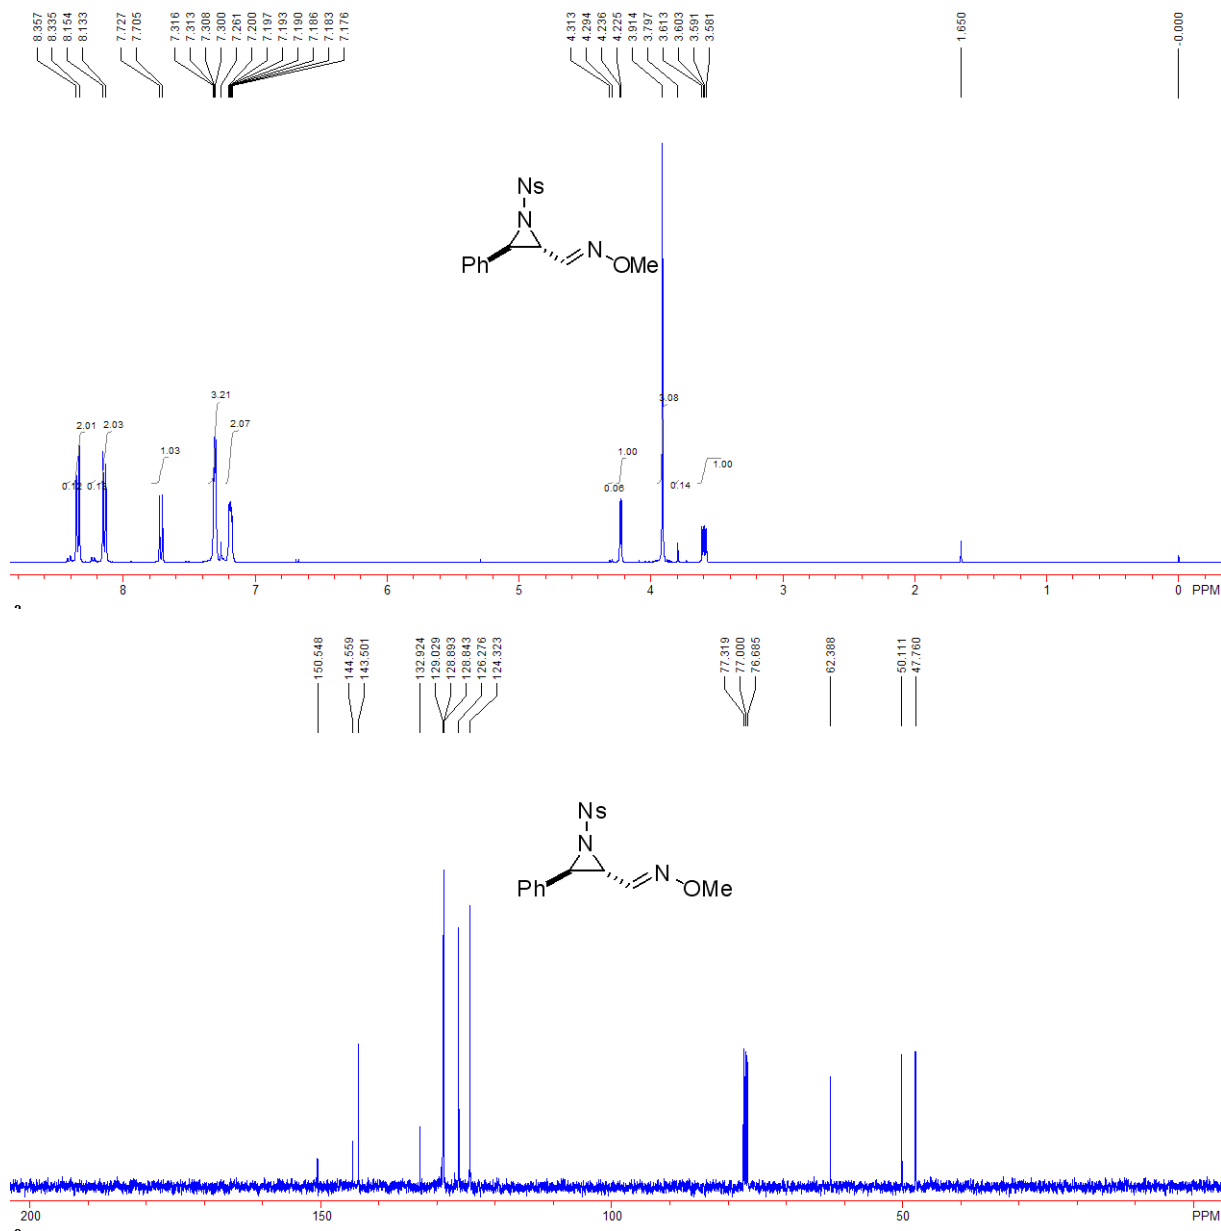

Compound **1n**: Prepared according to the general method (2.0 mmol PhI=NNs) and the title compound was isolated as a white solid (91mg, 9% yield); mp. 67–70 °C; IR (neat)  $\nu$  2958,

2925, 2854, 1597, 1531, 1448, 1350, 1309, 1260, 1166, 1088, 1012  $\text{cm}^{-1}$ ;  $^1\text{H}$  NMR ( $\text{CDCl}_3$ , 400 MHz, TMS)  $\delta$  1.72 (3H, s), 2.47 (3H, s), 3.12 (3H, s), 4.13 (1H, d,  $J = 6.4$  Hz), 6.70 (1H, d,  $J = 6.4$  Hz), 7.33–7.39 (5H, m), 7.43–7.48 (2H, m), 7.77 (2H, d,  $J = 8.0$  Hz), 7.85 (2H, d,  $J = 8.4$  Hz), 8.14 (2H, d,  $J = 8.4$  Hz);  $^{13}\text{C}$  NMR ( $\text{CDCl}_3$ , 100 MHz, TMS)  $\delta$  21.5, 22.3, 32.9, 50.5, 58.0, 124.0, 128.0, 128.5, 129.0, 129.6, 133.4, 136.6, 136.8, 144.6, 144.8, 150.0; MS (ESI)  $m/z$  551.0 ( $\text{M}^+ + \text{Na}$ ); HRMS (ESI) calcd. for  $\text{C}_{24}\text{H}_{24}\text{N}_4\text{O}_6\text{S}_2\text{Na}^{+1}$ : 551.1030, Found: 551.1033.

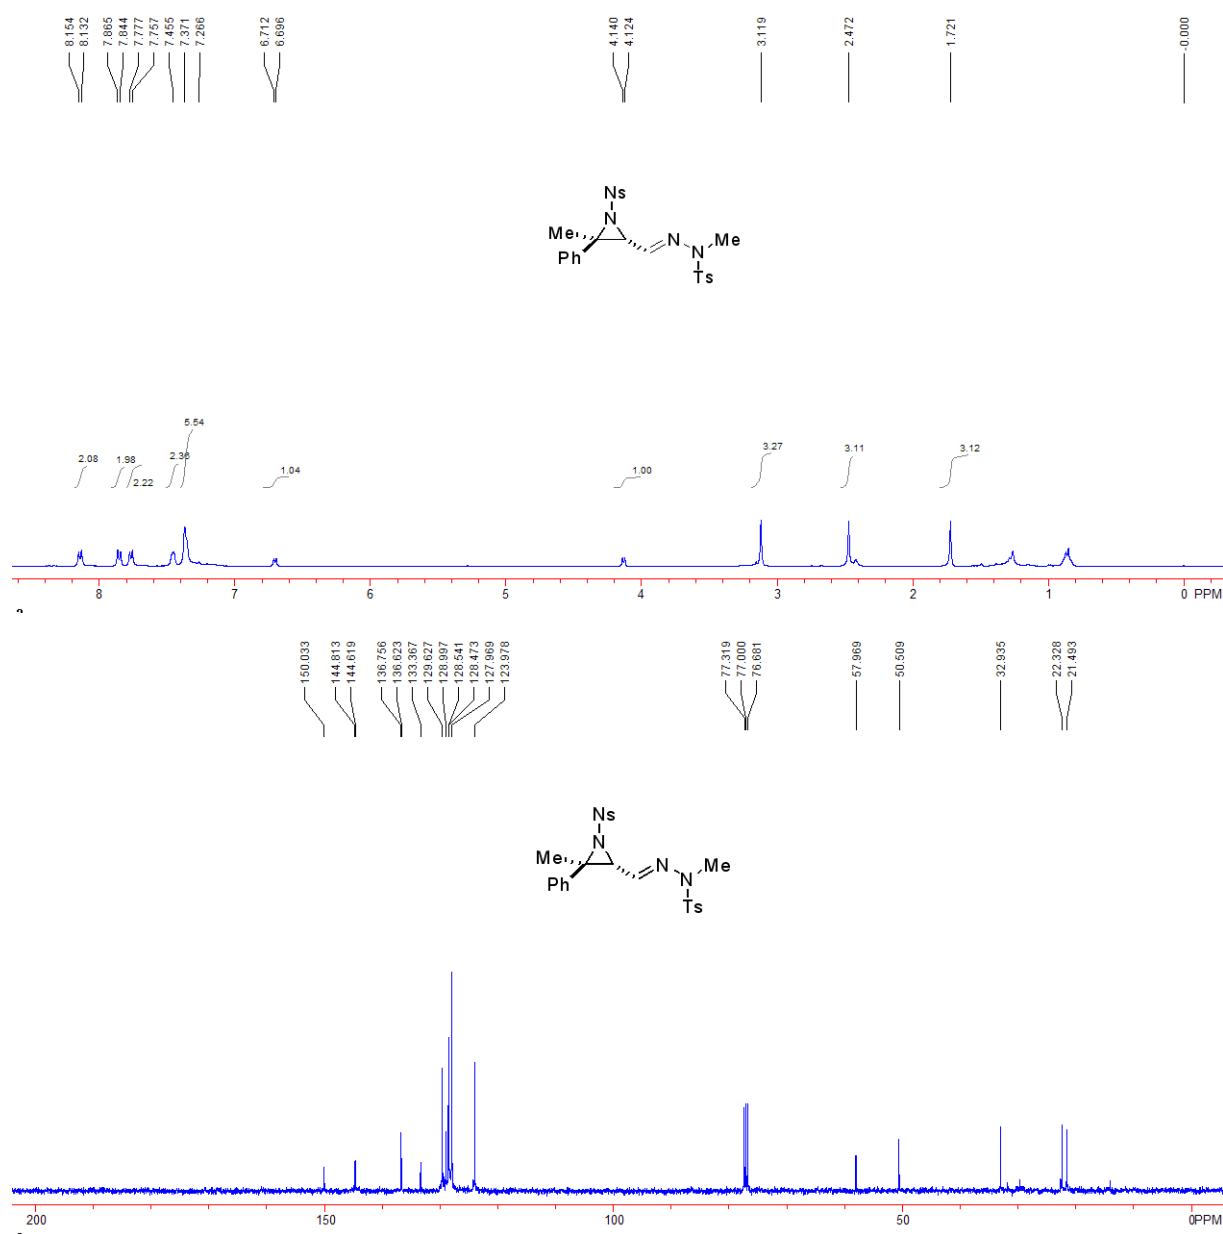

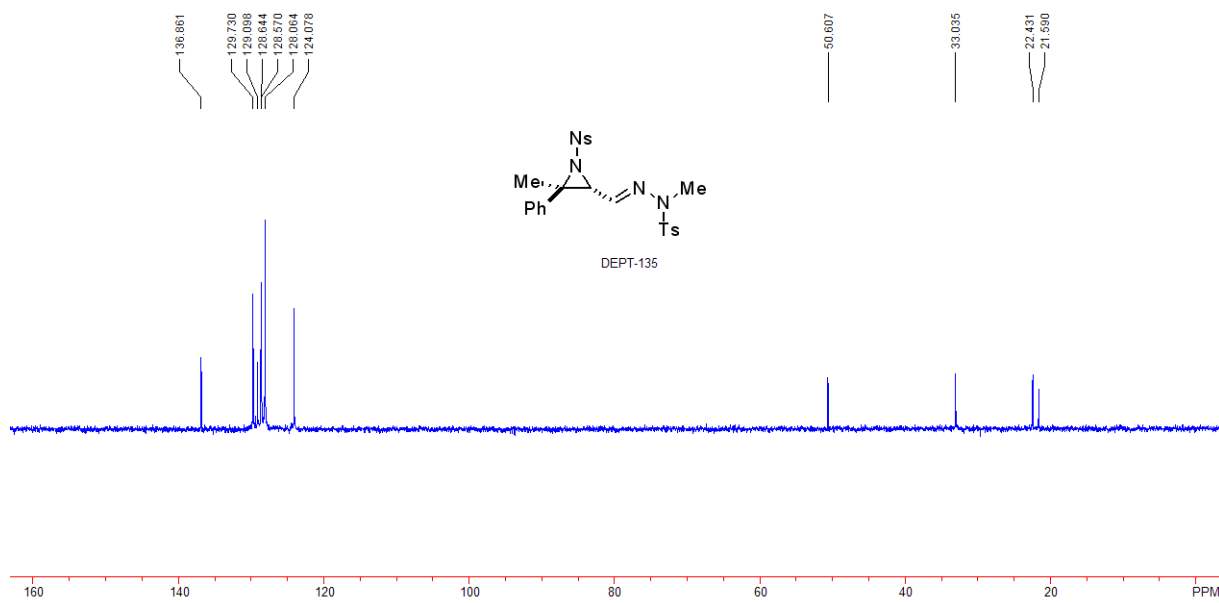

Compound **2a**: General procedure was followed (**1a**: 31 mg, 0.06 mmol) and flash column chromatography gave the title compound as a yellow solid (31 mg, 99%); mp. 78–80 °C; IR (neat)  $\nu$  2925, 1628, 1598, 1530, 1449, 1350, 1309, 1224, 1164, 1089, 1015, 935  $\text{cm}^{-1}$ ;  $^1\text{H}$  NMR ( $\text{CDCl}_3$ , 400 MHz, TMS)  $\delta$  2.44 (3H, s), 3.16 (3H, s), 6.98 (1H, dd,  $J = 2.0, 9.6$  Hz), 7.18–7.20 (2H, m), 7.25–7.37 (6H, m), 7.79 (2H, d,  $J = 8.4$  Hz), 8.15–8.19 (2H, m), 8.33–8.36 (2H, m), 11.55 (1H, d,  $J = 9.6$  Hz);  $^{13}\text{C}$  NMR ( $\text{CDCl}_3$ , 100 MHz, TMS)  $\delta$  21.5, 32.5, 114.2, 124.6, 126.4, 127.4, 127.7, 128.0, 128.8, 129.0, 130.1, 132.6, 137.4, 142.9, 144.9, 146.0, 150.1; MS (ESI)  $m/z$  515.0 ( $\text{M}^+\text{+H}$ ); HRMS (ESI) calcd. for  $\text{C}_{23}\text{H}_{23}\text{N}_4\text{O}_6\text{S}_2^{+1}$ : 515.1054, Found: 515.1069.

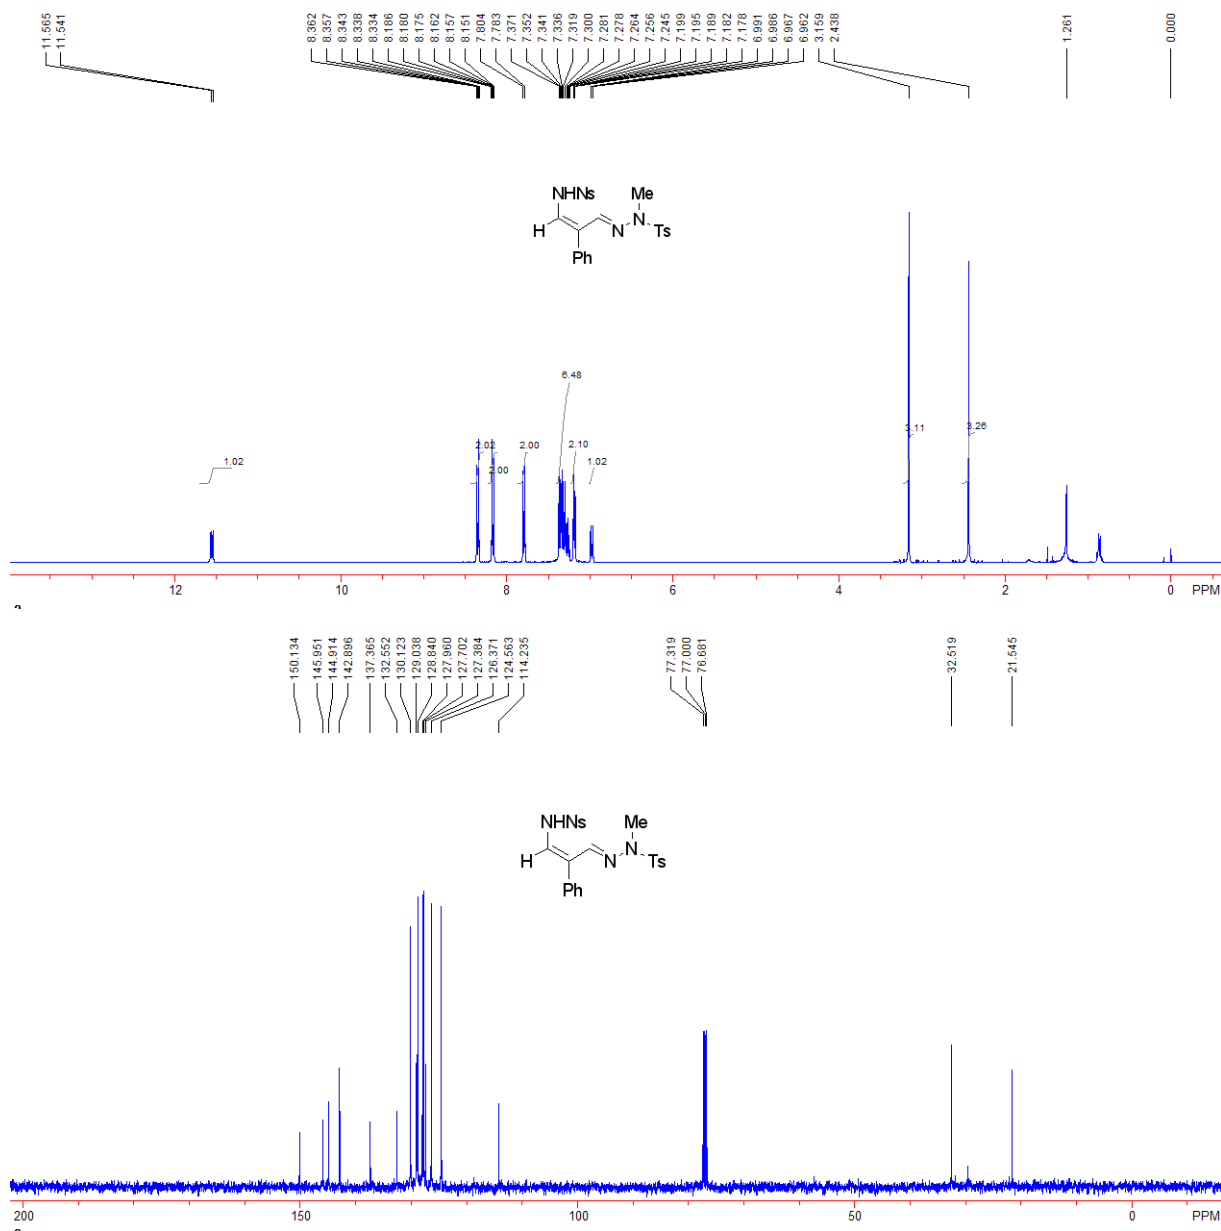

Compound **2b**: General procedure was followed (**1b**: 39 mg, 0.07 mmol) and flash column chromatography gave the title compound as a yellow solid (32 mg, 82%); mp. 102–105 °C; IR (neat)  $\nu$  2926, 1629, 1531, 1309, 1224, 1164, 1090, 1013, 934  $\text{cm}^{-1}$ ; <sup>1</sup>H NMR (CDCl<sub>3</sub>, 400 MHz, TMS)  $\delta$  2.45 (3H, s), 3.16 (3H, s), 6.96 (1H, dd,  $J$  = 2.0, 9.6 Hz), 7.11–7.13 (2H, m), 7.27–7.30 (2H, m), 7.37 (2H, d,  $J$  = 8.4 Hz), 7.79 (2H, d,  $J$  = 8.4 Hz), 8.17–8.19 (2H, m),



8.36–8.39 (2H, m), 11.57 (1H, d,  $J = 9.6$  Hz);  $^{13}\text{C}$  NMR ( $\text{CDCl}_3$ , 100 MHz, TMS)  $\delta$  21.6, 32.5, 113.1, 124.6, 127.71, 127.75, 128.0, 129.0, 129.4, 130.2, 132.6, 133.4, 135.9, 142.2, 145.0, 145.9, 150.2; MS (ESI)  $m/z$  548.9 ( $\text{M}^+\text{H}$ ); HRMS (ESI) calcd. for  $\text{C}_{23}\text{H}_{21}\text{N}_4\text{O}_6\text{S}_2\text{ClNa}^+$ : 571.0483, Found: 571.0509.

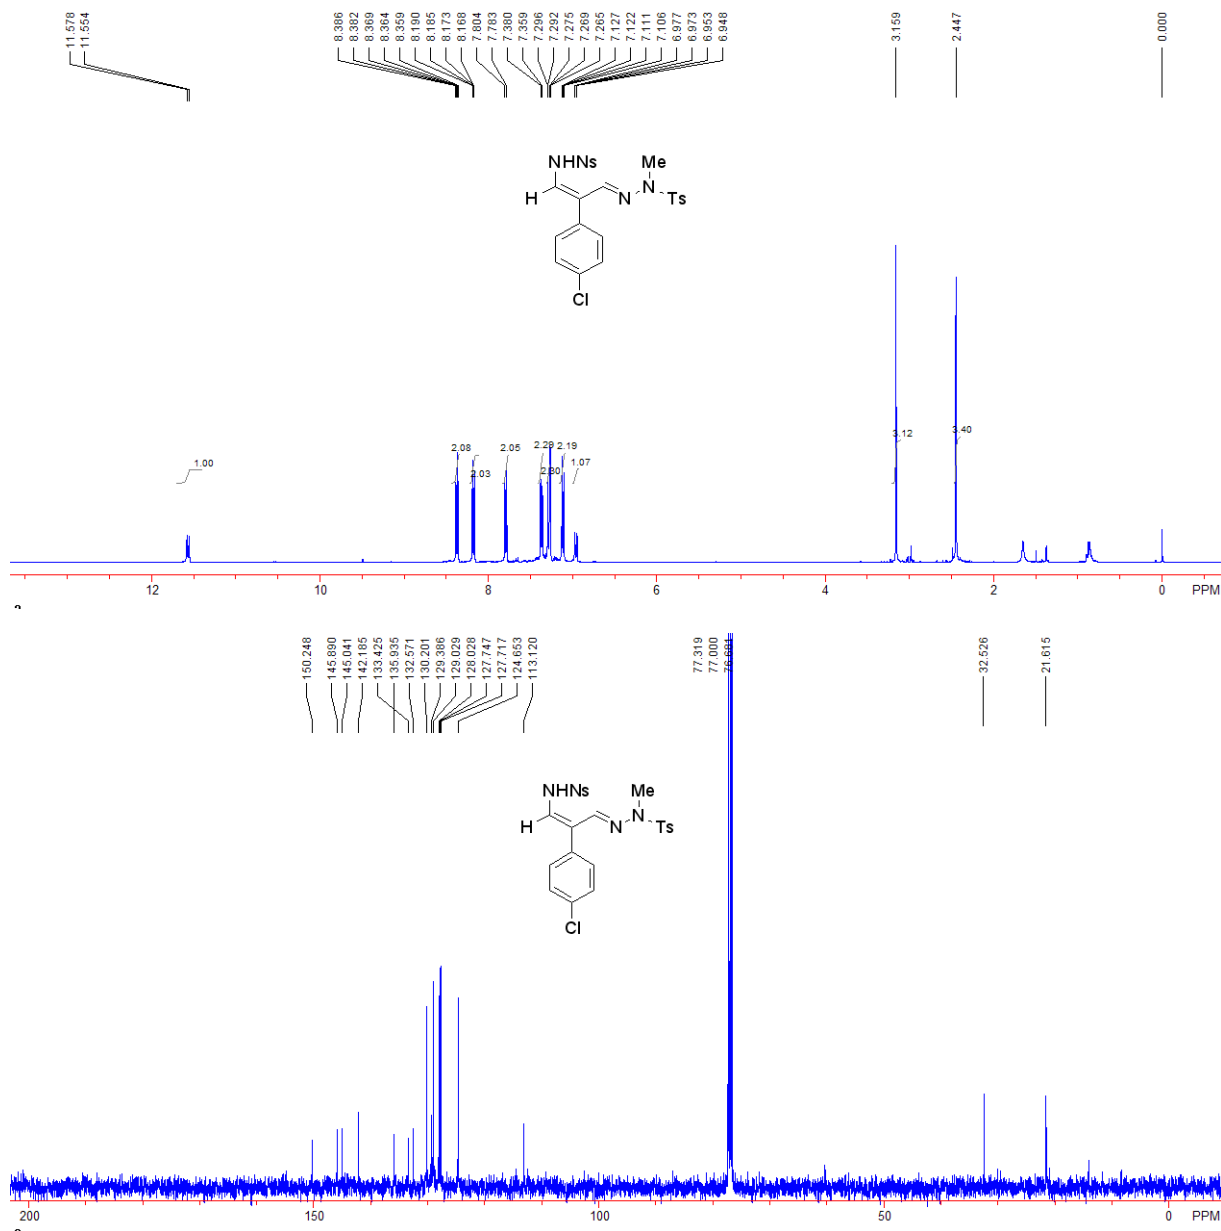

Compound **2c**: General procedure was followed (**1c**: 53 mg, 0.10 mmol) and flash column

chromatography gave the title compound as a yellow solid (49 mg, 92%); mp. 70–72 °C; IR (neat)  $\nu$  2925, 1628, 1531, 1309, 1224, 1164, 1089, 1014, 934  $\text{cm}^{-1}$ ;  $^1\text{H}$  NMR ( $\text{CDCl}_3$ , 400 MHz, TMS)  $\delta$  2.32 (3H, s), 2.44 (3H, s), 3.16 (3H, s), 6.93 (1H, dd,  $J = 2.0, 9.6$  Hz), 7.07 (2H, d,  $J = 8.0$  Hz), 7.13 (2H, d,  $J = 8.0$  Hz), 7.31 (1H, s), 7.37 (2H, d,  $J = 8.0$  Hz), 7.80 (2H, d,  $J = 8.0$  Hz), 8.17 (2H, d,  $J = 8.8$  Hz), 8.36 (2H, d,  $J = 8.8$  Hz), 11.51 (1H, d,  $J = 9.6$  Hz);  $^{13}\text{C}$  NMR ( $\text{CDCl}_3$ , 100 MHz, TMS)  $\delta$  21.0, 21.6, 32.5, 114.2, 124.6, 126.3, 127.8, 128.0, 128.5, 129.5, 130.1, 132.6, 134.5, 137.3, 143.0, 144.9, 146.0, 150.1; MS (ESI)  $m/z$  529.0 ( $\text{M}^+\text{+H}$ ); HRMS (ESI) calcd. for  $\text{C}_{24}\text{H}_{24}\text{N}_4\text{O}_6\text{S}_2\text{Na}^+$ : 551.1030, Found: 551.1045.

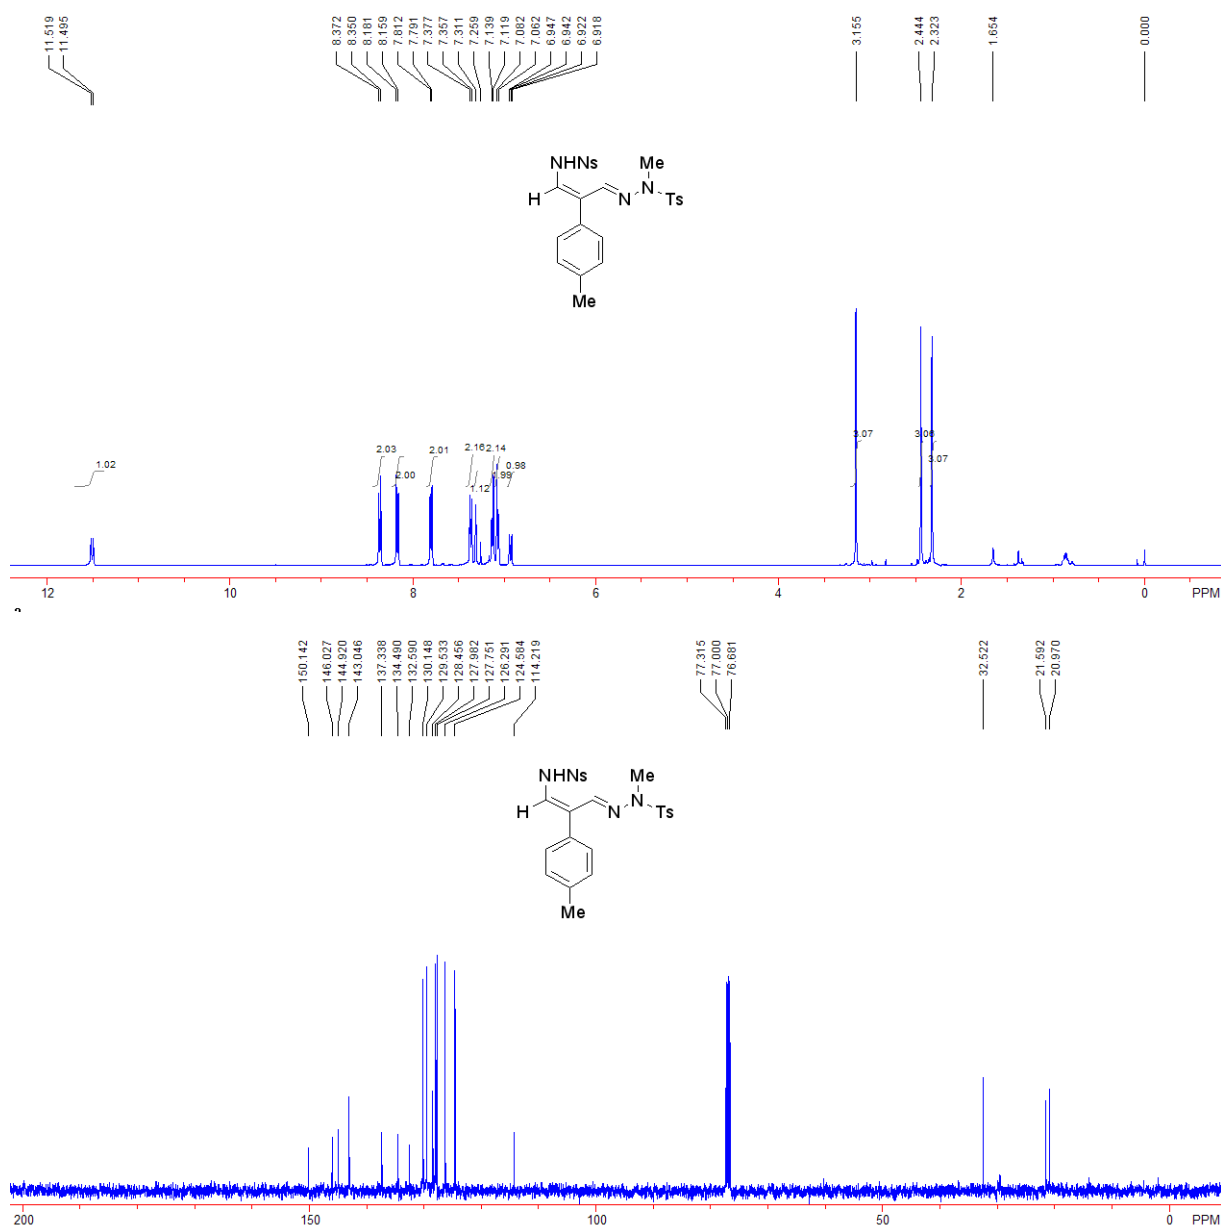

Compound **2d**: General procedure was followed (**1d**: 52 mg, 0.09 mmol) and flash column chromatography gave the title compound as a yellow solid (34 mg, 65%); mp. 88–90 °C; IR (neat)  $\nu$  2926, 1632, 1531, 1350, 1308, 1261, 1165, 1088, 1016, 934  $\text{cm}^{-1}$ ;  $^1\text{H}$  NMR ( $\text{CDCl}_3$ , 400 MHz, TMS)  $\delta$  2.45 (3H, s), 3.10 (3H, s), 6.87 (1H, dd,  $J = 2.0, 9.6$  Hz), 7.13 (1H, d,  $J = 2.0$  Hz), 7.18–7.21 (2H, m), 7.28–7.32 (1H, m), 7.37 (1H, d,  $J = 8.4$  Hz), 7.56 (1H, d,  $J = 8.0$  Hz), 7.78 (2H, d,  $J = 8.4$  Hz), 8.17–8.20 (2H, m), 8.37–8.40 (2H, m), 11.48 (1H, d,  $J = 9.6$  Hz);  $^{13}\text{C}$  NMR ( $\text{CDCl}_3$ , 100 MHz, TMS)  $\delta$  21.6, 32.7, 113.9, 123.8, 124.6, 127.8, 127.9, 128.1, 129.7, 130.1, 131.3, 131.8, 132.5, 133.2, 137.7, 143.6, 144.9, 146.0, 150.2; MS (ESI)  $m/z$  592.9 ( $\text{M}^++\text{H}$ ); HRMS (ESI) calcd. for  $\text{C}_{23}\text{H}_{21}\text{N}_4\text{O}_6\text{S}_2\text{BrNa}^+$ : 614.9978, Found: 614.9977.

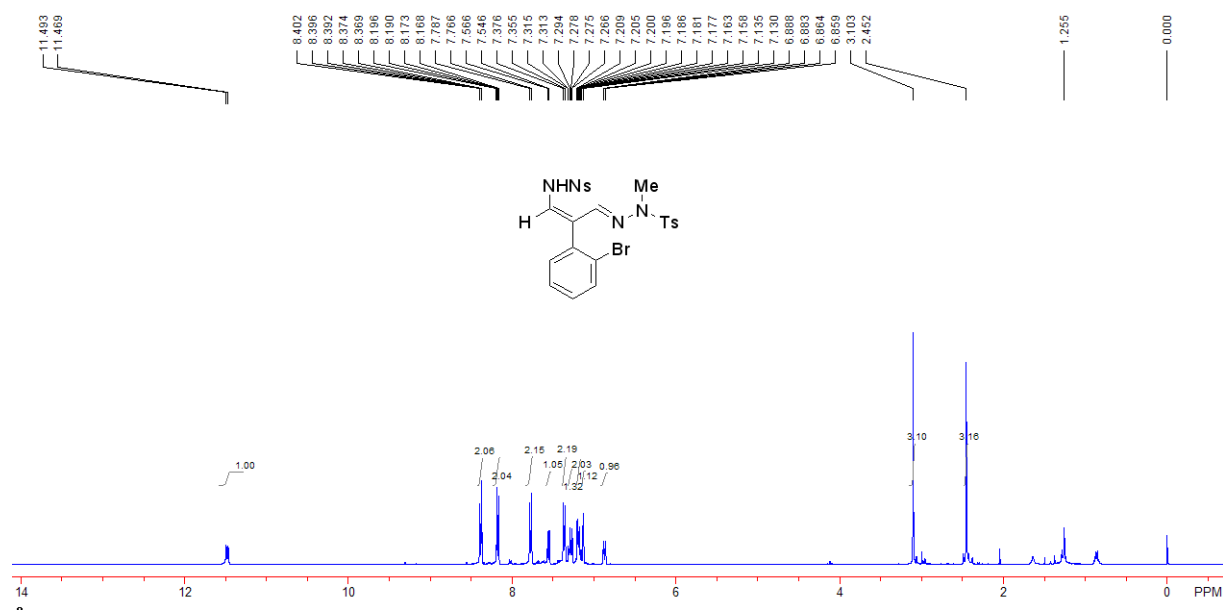

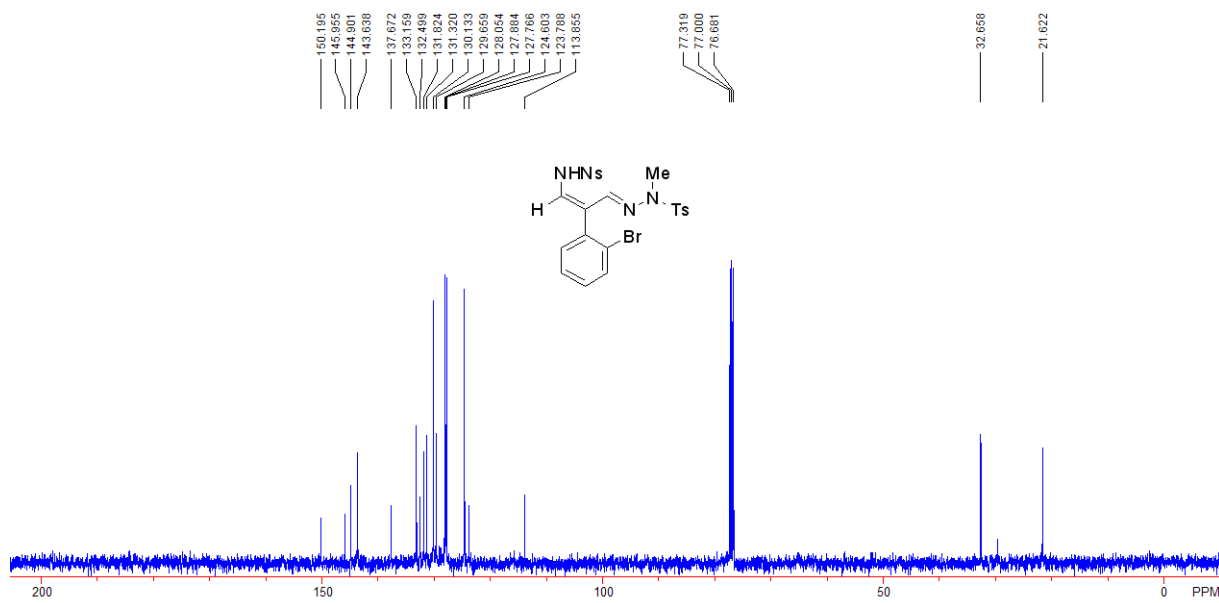

Compound **2e**: General procedure was followed (**1e**: 54 mg, 0.10 mmol) and flash column chromatography gave the title compound as a yellow solid (43 mg, 80%); mp. 76–78 °C; IR (neat)  $\nu$  2925, 1628, 1605, 1530, 1350, 1310, 1227, 1164, 1089, 1021, 941  $\text{cm}^{-1}$ ;  $^1\text{H}$  NMR ( $\text{CDCl}_3$ , 400 MHz, TMS)  $\delta$  2.45 (3H, s), 3.16 (3H, s), 3.79 (3H, s), 6.71 (1H, d,  $J = 1.6$  Hz), 6.76 (1H, d,  $J = 8.0$  Hz), 6.82 (1H, dd,  $J = 1.6, 8.0$  Hz), 6.99 (1H, dd,  $J = 1.6, 10.0$  Hz), 7.24 (1H, t,  $J = 8.0$  Hz), 7.31 (1H, s), 7.37 (2H, d,  $J = 8.0$  Hz), 7.80 (2H, d,  $J = 8.0$  Hz), 8.18 (2H, d,  $J = 8.4$  Hz), 8.37 (2H, d,  $J = 8.4$  Hz), 11.56 (1H, d,  $J = 10.0$  Hz);  $^{13}\text{C}$  NMR ( $\text{CDCl}_3$ , 100 MHz, TMS)  $\delta$  21.6, 32.5, 55.3, 112.2, 112.6, 114.1, 118.8, 124.6, 127.7, 128.0, 129.1, 129.9, 130.2, 132.5, 138.8, 142.8, 145.0, 146.0, 150.2, 159.8; MS (ESI)  $m/z$  545.0 ( $\text{M}^+\text{+H}$ ); HRMS (ESI) calcd. for  $\text{C}_{24}\text{H}_{24}\text{N}_4\text{O}_7\text{S}_2\text{Na}^+$ : 567.0979, Found: 567.0981.

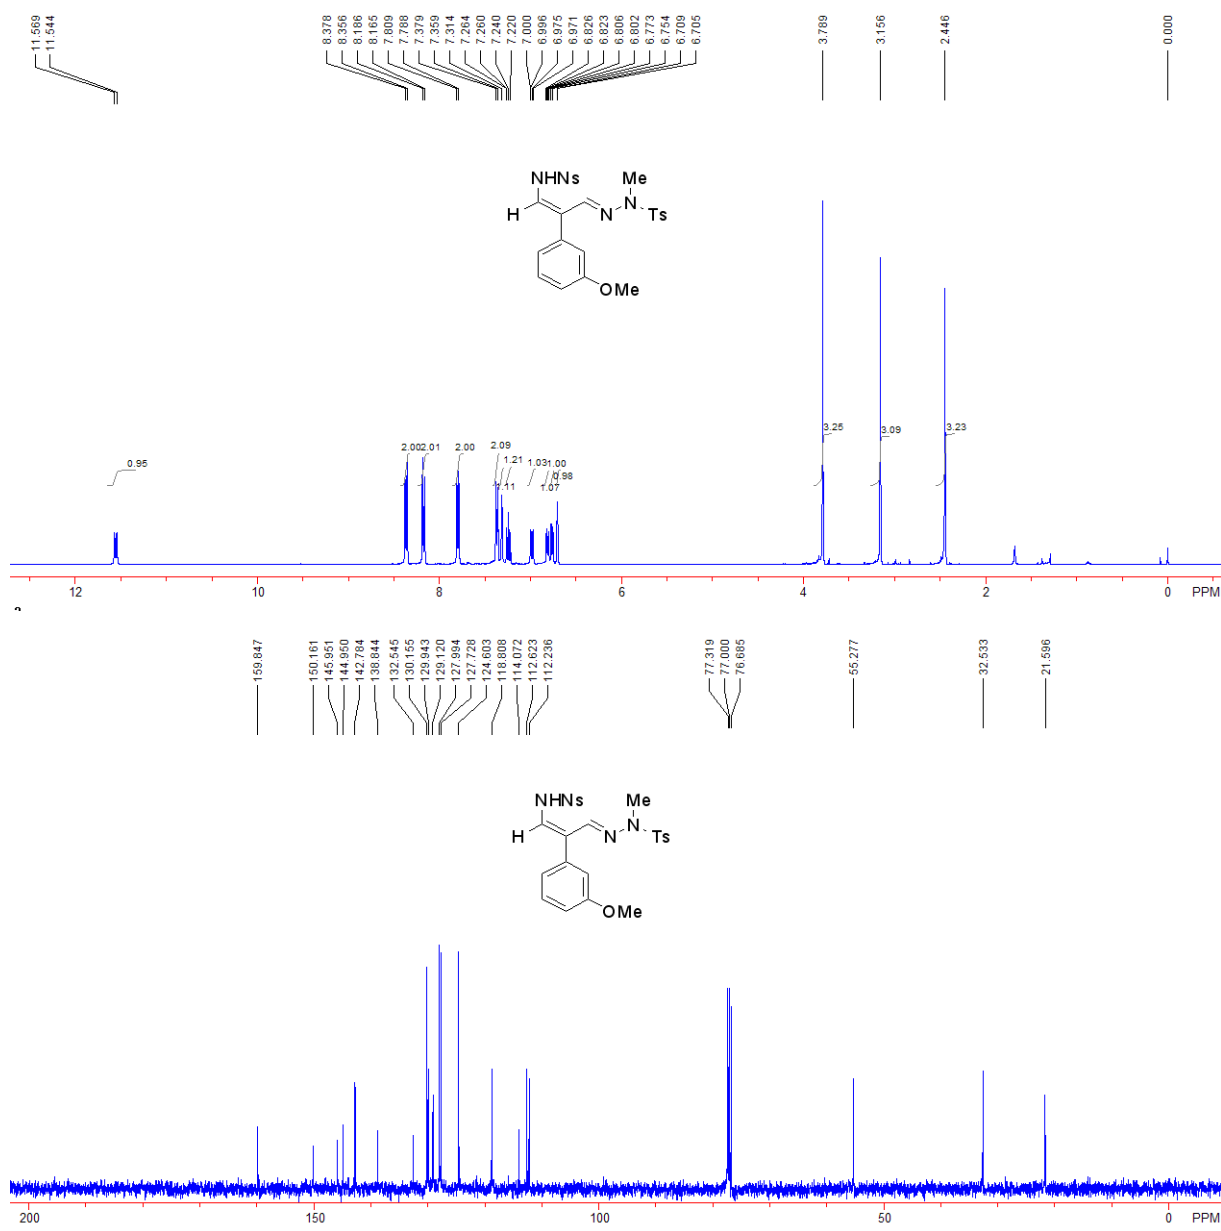

Compound **2f**: General procedure was followed (**1f**: 62 mg, 0.10 mmol) and flash column chromatography gave the title compound as a yellow solid (53 mg, 85%); mp. 178–180 °C; IR (neat)  $\nu$  2954, 2923, 2852, 1735, 1632, 1588, 1530, 1489, 1462, 1378, 1348, 1248, 1227, 1164, 1087  $\text{cm}^{-1}$ ; <sup>1</sup>H NMR (CDCl<sub>3</sub>, 400 MHz, TMS)  $\delta$  2.45 (3H, s), 3.09 (3H, s), 3.72 (3H, s), 6.88 (1H, dd,  $J = 2.0, 9.6$  Hz), 6.94 (1H, d,  $J = 8.4$  Hz), 6.98 (1H, d,  $J = 2.0$  Hz), 7.05 (1H, dd,  $J =$

2.0, 8.0 Hz), 7.21 (1H, s), 7.37 (2H, d,  $J = 8.0$  Hz), 7.79 (2H, d,  $J = 8.0$  Hz), 8.16 (2H, d,  $J = 8.8$  Hz), 8.36 (2H, d,  $J = 8.8$  Hz), 11.51 (1H, d,  $J = 9.6$  Hz);  $^{13}\text{C}$  NMR ( $\text{CDCl}_3$ , 100 MHz, TMS)  $\delta$  21.6, 32.8, 55.7, 110.4, 114.5, 122.4, 124.0, 124.5, 125.2, 127.8, 128.0, 130.1, 131.0, 131.2, 132.5, 144.7, 144.8, 146.0, 150.1, 157.3; MS (ESI)  $m/z$  622.9 ( $\text{M}^+\text{H}$ ); HRMS (ESI) calcd. for  $\text{C}_{24}\text{H}_{23}\text{N}_4\text{O}_7\text{S}_2\text{BrNa}^+$ : 645.0084, Found: 645.0086.

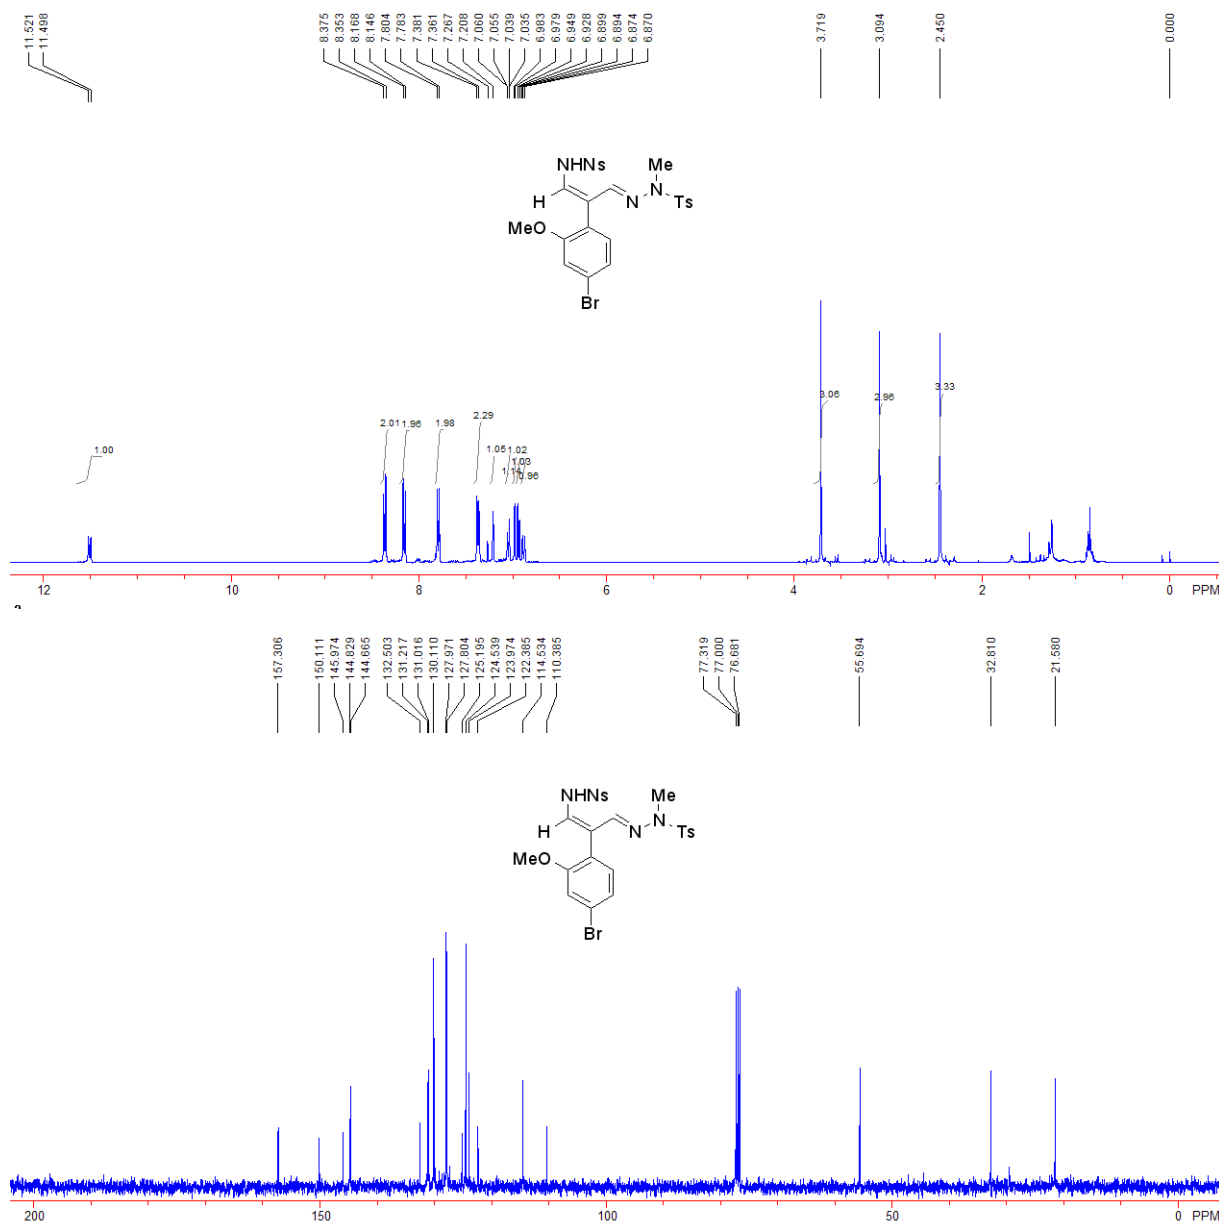

Compound **2g**: TfOH (10 mol%) was used (**1g**: 48 mg, 0.10 mmol) and flash column chromatography gave the title compound as a yellow solid (15 mg, 30%); mp. 125–127 °C; IR

(neat)  $\nu$  3267, 2960, 2924, 2871, 1632, 1530, 1456, 1401, 1347, 1307, 1212, 1162, 1107, 1087  $\text{cm}^{-1}$ ;  $^1\text{H}$  NMR ( $\text{CDCl}_3$ , 400 MHz, TMS)  $\delta$  0.92 (3H, t,  $J = 7.6$  Hz), 1.55–1.60 (2H, m), 2.44–2.48 (2H, m), 2.46 (3H, s), 3.04 (3H, s), 5.00 (1H, d,  $J = 5.6$  Hz), 7.08 (1H, dd,  $J = 1.6$ , 5.6 Hz), 7.39 (2H, d,  $J = 8.4$  Hz), 7.82 (2H, d,  $J = 8.4$  Hz), 8.09–8.11 (2H, m), 8.29–8.32 (2H, m), 10.95 (1H, d,  $J = 1.6$  Hz);  $^{13}\text{C}$  NMR ( $\text{CDCl}_3$ , 100 MHz, TMS)  $\delta$  13.7, 21.6, 21.7, 34.5, 35.9, 100.1, 124.3, 128.25, 128.32, 130.1, 131.9, 144.9, 146.8, 149.9, 154.1; MS (ESI)  $m/z$  481.0 ( $\text{M}^+ + \text{H}$ ); HRMS (ESI) calcd. for  $\text{C}_{20}\text{H}_{24}\text{N}_4\text{O}_6\text{S}_2\text{Na}^+$ : 503.1030, Found: 503.1036.

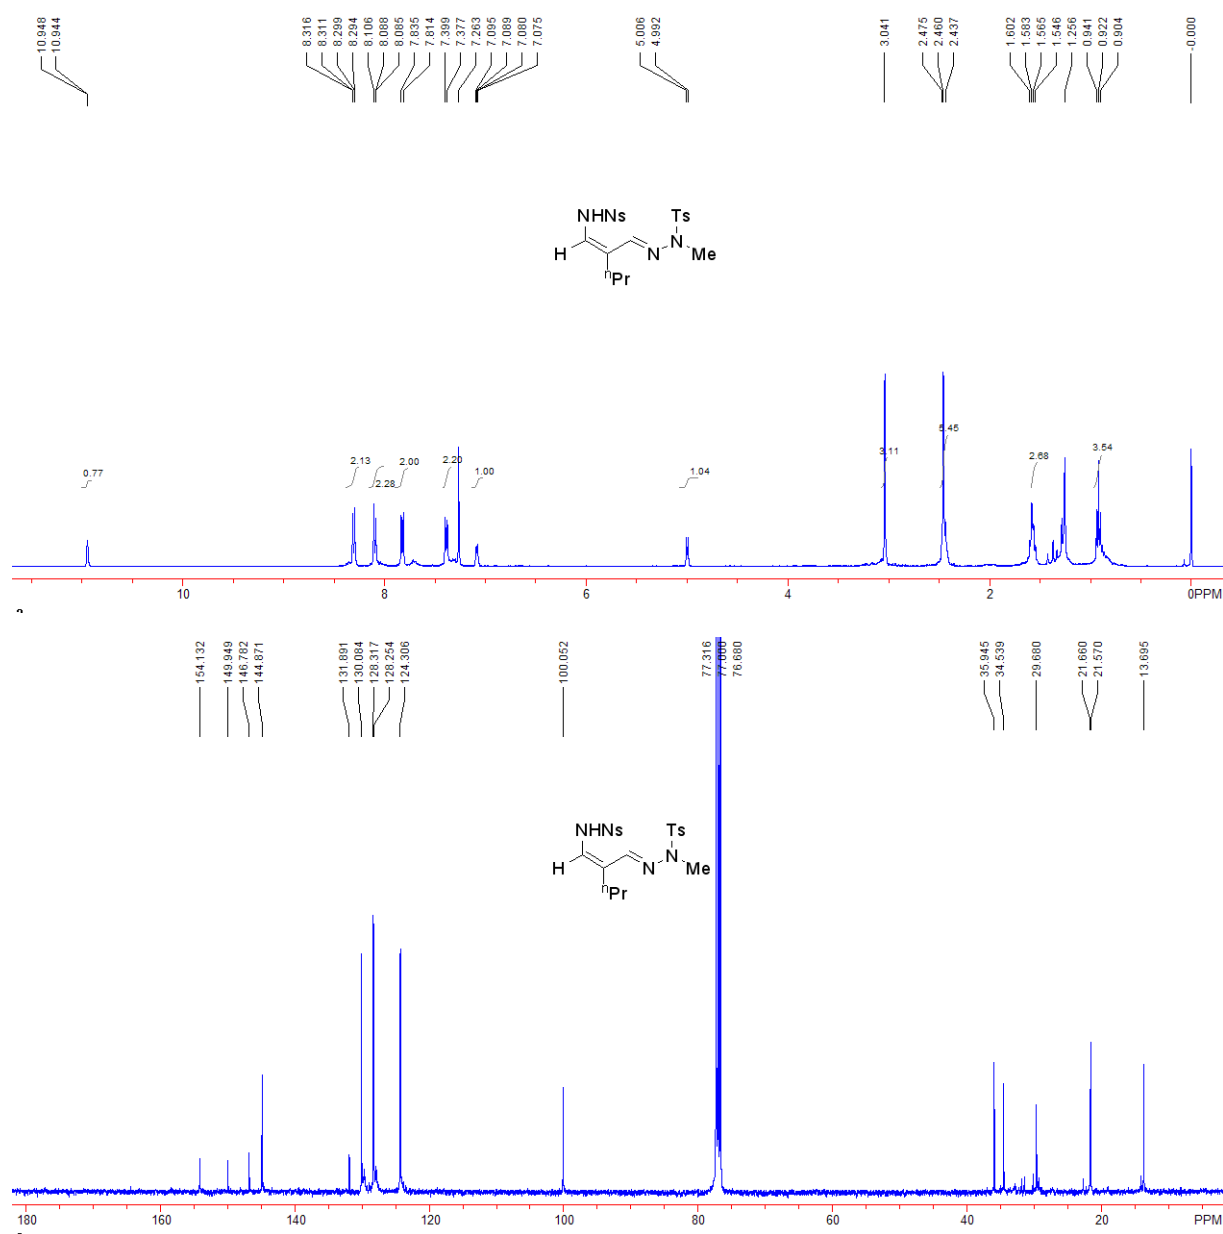

Compound **2h**: General procedure was followed (**1h**: 59 mg, 0.10 mmol) and flash column chromatography gave the title compound as a yellow solid (51 mg, 86%); mp. 168–170 °C; IR (neat)  $\nu$  2957, 2923, 2853, 1685, 1628, 1605, 1531, 1496, 1454, 1349, 1260, 1167, 1089, 1018  $\text{cm}^{-1}$ ;  $^1\text{H}$  NMR ( $\text{CDCl}_3$ , 400 MHz, TMS)  $\delta$  2.47 (3H, s), 4.75 (2H, s), 6.86–6.88 (2H, m), 7.08–7.10 (1H, m), 7.20–7.25 (5H, m), 7.28–7.34 (4H, m), 7.40 (2H, d,  $J = 8.4$  Hz), 7.86 (2H, d,  $J = 8.4$  Hz), 8.11–8.14 (2H, m), 8.34–8.37 (2H, m), 11.37 (1H, d,  $J = 8.8$  Hz);  $^{13}\text{C}$  NMR ( $\text{CDCl}_3$ , 100 MHz, TMS)  $\delta$  21.6, 51.8, 113.5, 124.6, 126.0, 127.1, 127.2, 127.9, 128.0, 128.2, 128.8, 129.1, 130.3, 133.0, 133.4, 133.9, 137.1, 145.1, 146.0, 146.1, 150.2; MS (ESI)  $m/z$  591.0 ( $\text{M}^+ + \text{H}$ ); HRMS (ESI) calcd. for  $\text{C}_{29}\text{H}_{27}\text{N}_4\text{O}_6\text{S}_2^{+1}$ : 591.1367, Found: 591.1360.

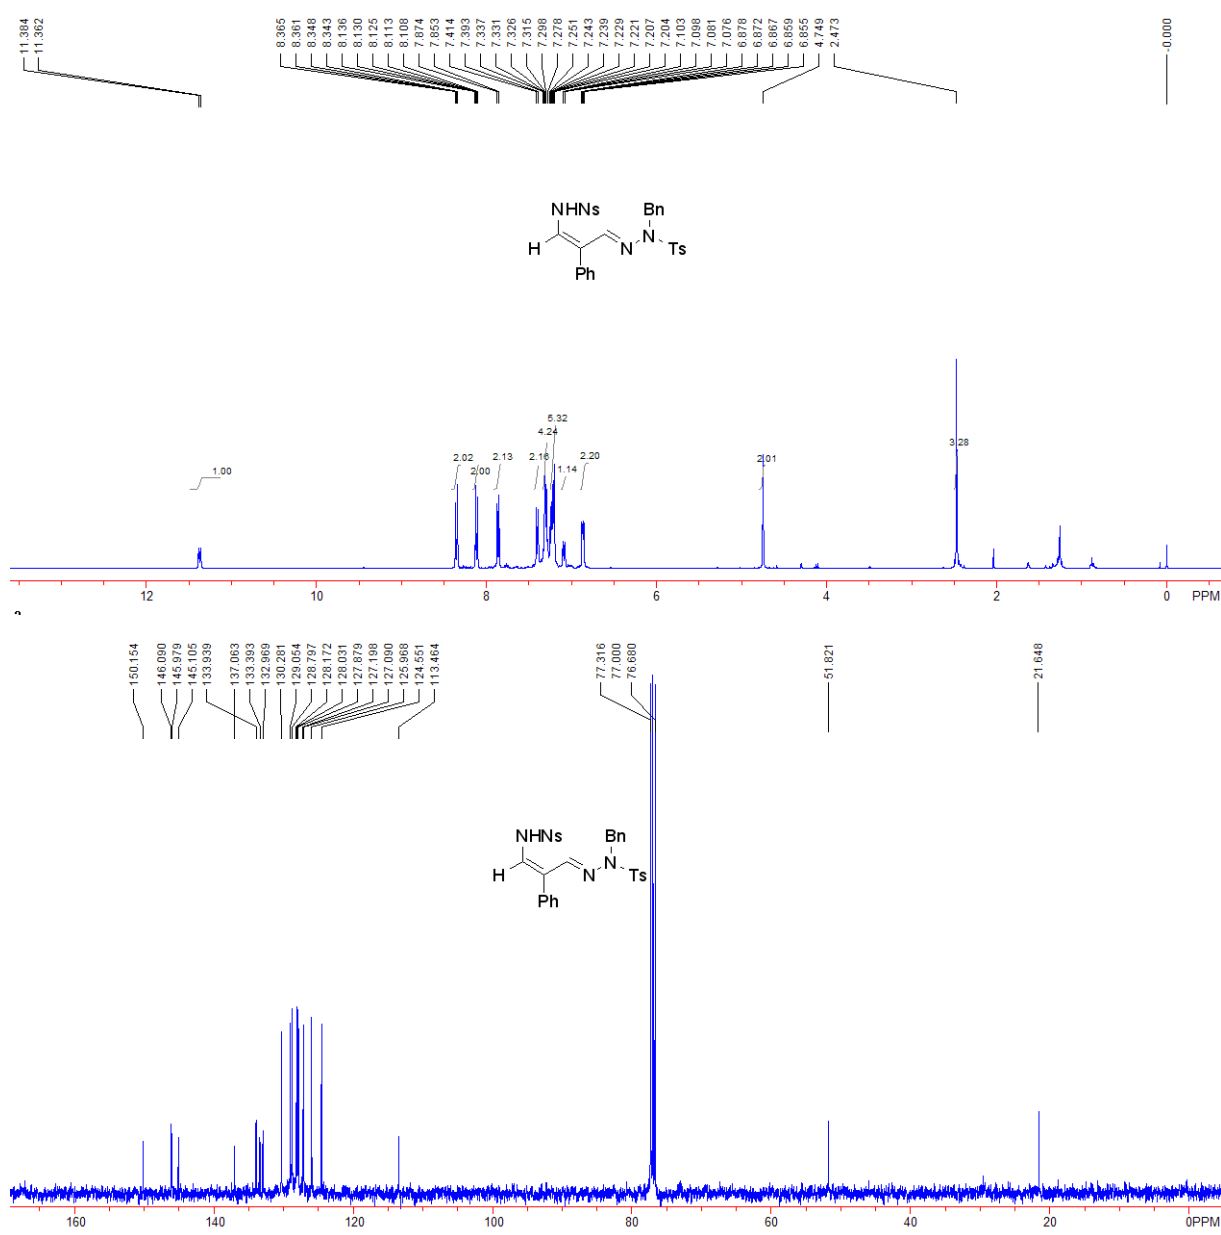



Compound **2i**: General procedure was followed (**1i**: 55 mg, 0.10 mmol) and flash column chromatography gave the title compound as a yellow solid (48 mg, 87%); mp. 177–179 °C; IR (neat)  $\nu$  2926, 1598, 1532, 1309, 1168, 1089, 899  $\text{cm}^{-1}$ ;  $^1\text{H}$  NMR ( $\text{CDCl}_3$ , 400 MHz, TMS)  $\delta$  1.56 (3H, t,  $J = 2.4$  Hz), 2.45 (3H, s), 4.48 (2H, d,  $J = 2.4$  Hz), 7.20–7.23 (2H, m), 7.27–7.37 (6H, m), 7.62 (1H, t,  $J = 2.0$  Hz), 7.81–7.83 (2H, m), 8.12–8.16 (2H, m), 8.35–8.38 (2H, m), 11.46 (1H, dd,  $J = 2.0, 7.6$  Hz);  $^{13}\text{C}$  NMR ( $\text{CDCl}_3$ , 100 MHz, TMS)  $\delta$  3.3, 21.6, 37.1, 69.2, 83.7, 113.0, 124.5, 126.3, 127.3, 128.0, 128.5, 128.9, 129.8, 133.2, 137.1, 137.3, 145.0, 146.1, 147.1, 150.1; MS (ESI)  $m/z$  553.1 ( $\text{M}^+ + \text{H}$ ); HRMS (ESI) calcd. for  $\text{C}_{26}\text{H}_{25}\text{N}_4\text{O}_6\text{S}_2^{+1}$ : 553.1210, Found: 553.1226.

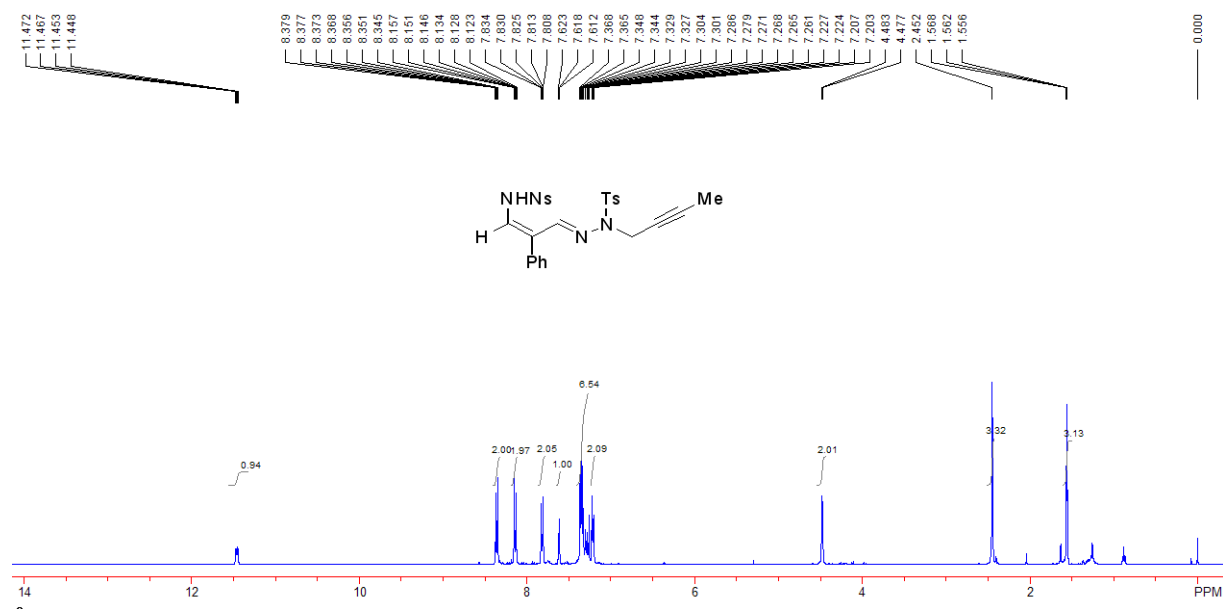

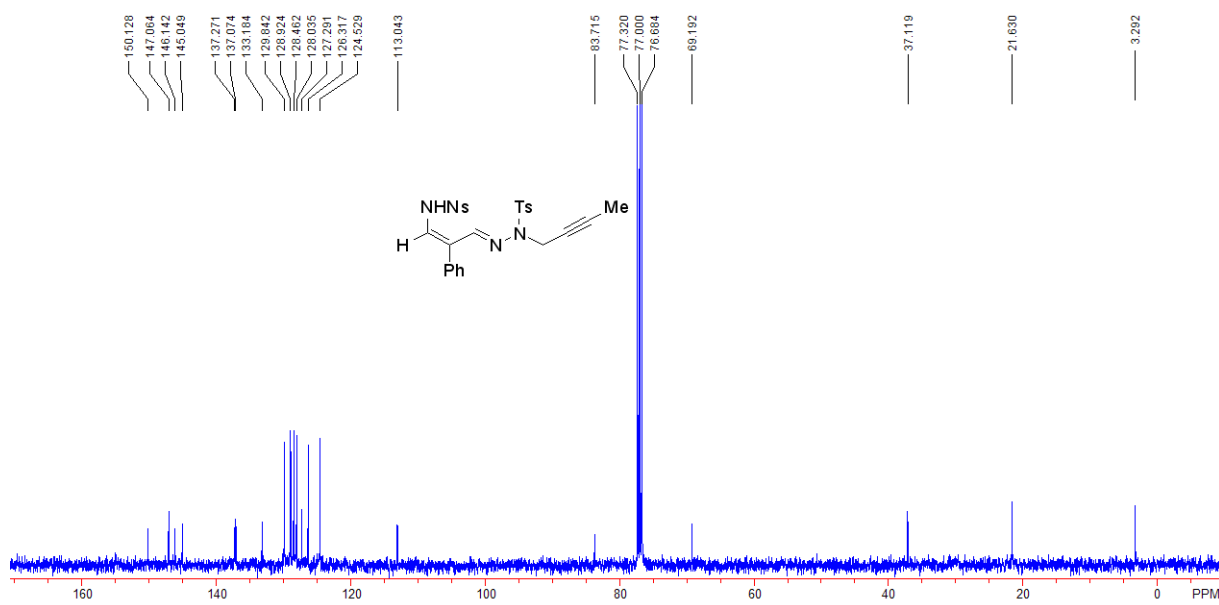

Compound **2j**: General procedure was followed (**1j**: 55 mg, 0.10 mmol) and flash column chromatography gave the title compound as a yellow solid (49 mg, 89%); mp. 158–160 °C; IR (neat)  $\nu$  3290, 2925, 1627, 1531, 1350, 1308, 1167, 1088, 935  $\text{cm}^{-1}$ ;  $^1\text{H}$  NMR ( $\text{CDCl}_3$ , 400 MHz, TMS)  $\delta$  2.02 (1H, t,  $J = 2.4$  Hz), 2.43–2.51 (2H, m), 2.47 (3H, s), 3.66 (2H, t,  $J = 7.2$  Hz), 7.20 (2H, d,  $J = 7.6$  Hz), 7.30–7.36 (3H, m), 7.38 (2H, d,  $J = 8.0$  Hz), 7.46 (1H, dd,  $J = 2.0, 7.2$  Hz), 7.67 (1H, s), 7.78 (2H, d,  $J = 8.0$  Hz), 8.10 (2H, d,  $J = 8.0$  Hz), 8.37 (2H, d,  $J = 8.0$  Hz), 11.23 (1H, d,  $J = 7.2$  Hz);  $^{13}\text{C}$  NMR ( $\text{CDCl}_3$ , 100 MHz, TMS)  $\delta$  18.2, 21.6, 47.1, 71.3, 79.8, 112.6, 124.5, 126.4, 127.4, 128.0, 128.1, 129.0, 130.3, 132.7, 137.0, 139.7, 145.3, 145.9, 149.2, 150.2; MS (ESI)  $m/z$  553.0 ( $\text{M}^+ + \text{H}$ ); HRMS (ESI) calcd. for  $\text{C}_{26}\text{H}_{25}\text{N}_4\text{O}_6\text{S}_2^{+1}$ : 553.1210, Found: 553.1224.

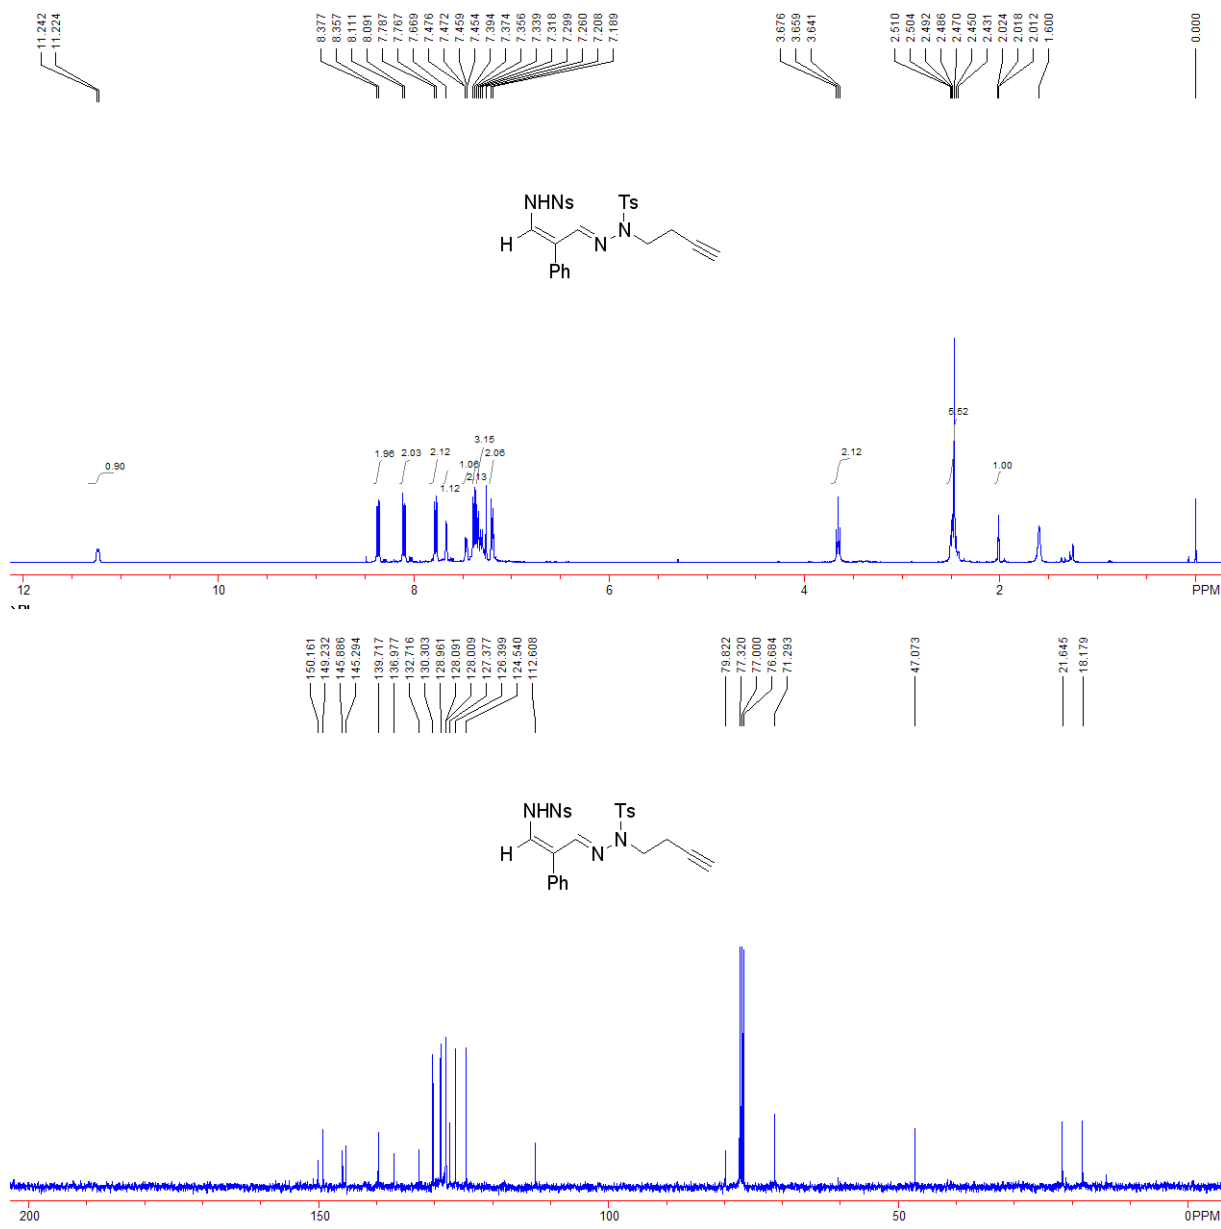

Compound **2f**: General procedure was followed (**1f**: 60 mg, 0.12 mmol) and flash column chromatography gave the title compound as a yellow solid (54 mg, 90%); mp. 178–180 °C; IR (neat)  $\nu$  2954, 2923, 2852, 1735, 1622, 1529, 1459, 1348, 1304, 1253, 1152, 1086  $\text{cm}^{-1}$ ; <sup>1</sup>H NMR (CDCl<sub>3</sub>, 400 MHz, TMS) 1.23 (6H, d,  $J = 6.8$  Hz), 1.37 (3H, t,  $J = 7.6$  Hz), 3.06 (2H, q,  $J = 7.6$  Hz), 4.39–4.46 (1H, m), 7.24 (2H, d,  $J = 7.6$  Hz), 7.32 (1H, d,  $J = 6.4$  Hz), 7.36–7.40

(2H, m), 7.54 (1H, d,  $J = 8.8$  Hz), 8.13–8.15 (2H, m), 8.35–8.37 (2H, m), 8.55 (1H, s), 11.38 (1H, d,  $J = 8.8$  Hz);  $^{13}\text{C}$  NMR ( $\text{CDCl}_3$ , 100 MHz, TMS) 7.8, 19.8, 45.6, 51.8, 109.2, 124.3, 126.3, 127.1, 128.4, 129.1, 136.4, 146.0, 150.1, 156.0, 161.7; MS (ESI)  $m/z$  481.0 ( $\text{M}^+\text{H}$ ); HRMS (ESI) calcd. for  $\text{C}_{20}\text{H}_{25}\text{N}_4\text{O}_6\text{S}_2^{+1}$ : 481.1210, Found: 481.1214.

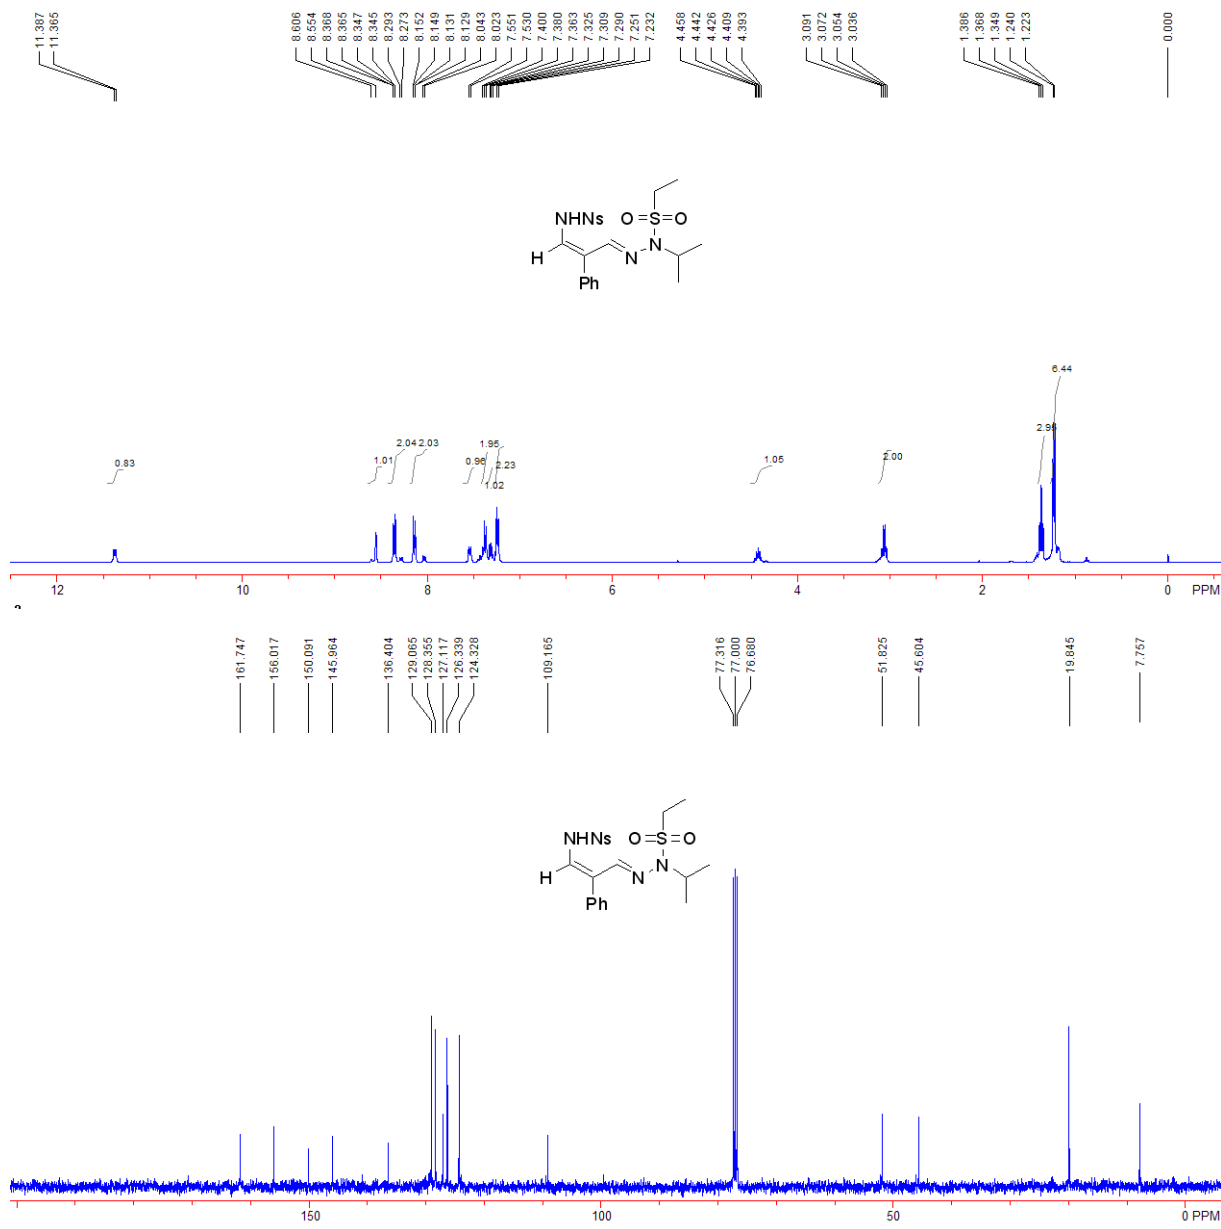

## 7. Isotope Labeling Experiments



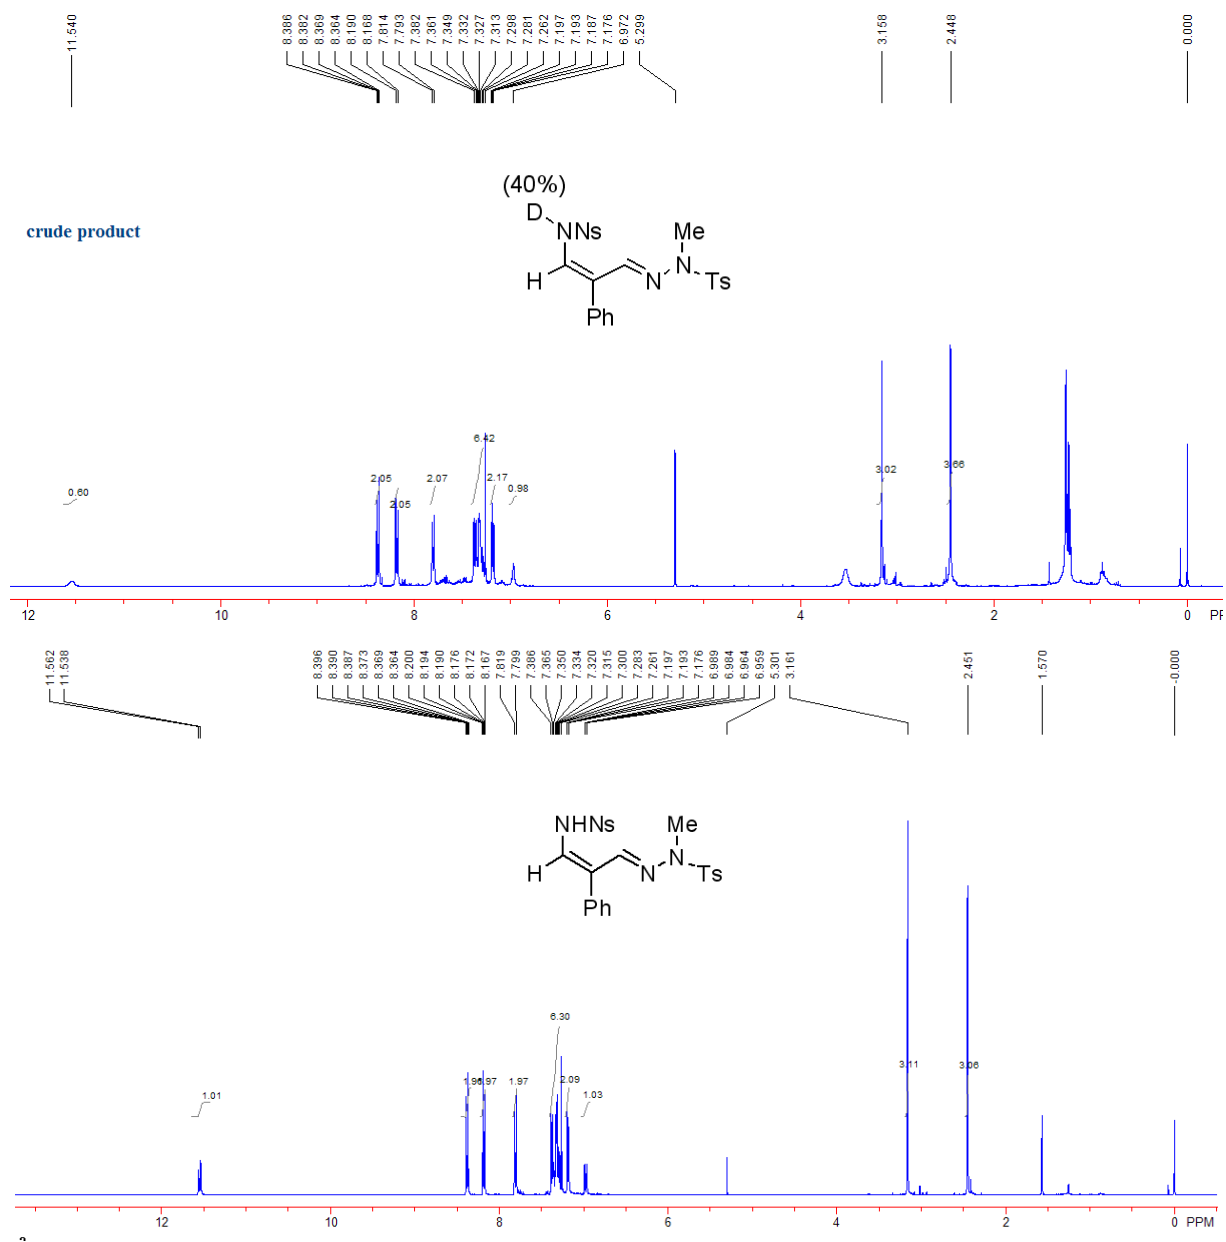

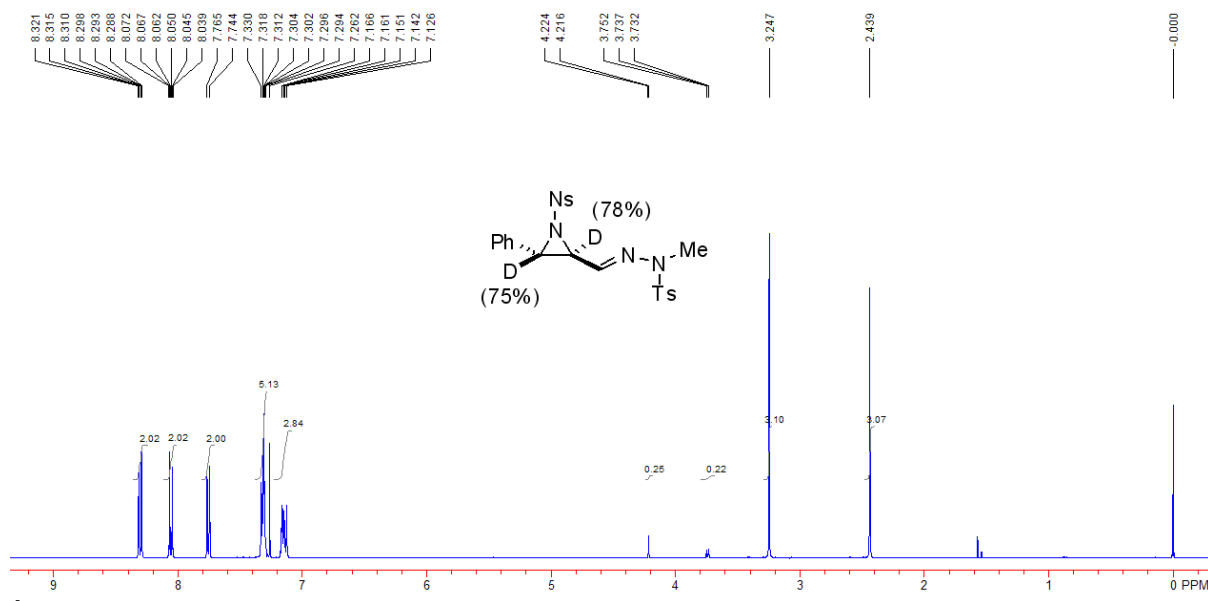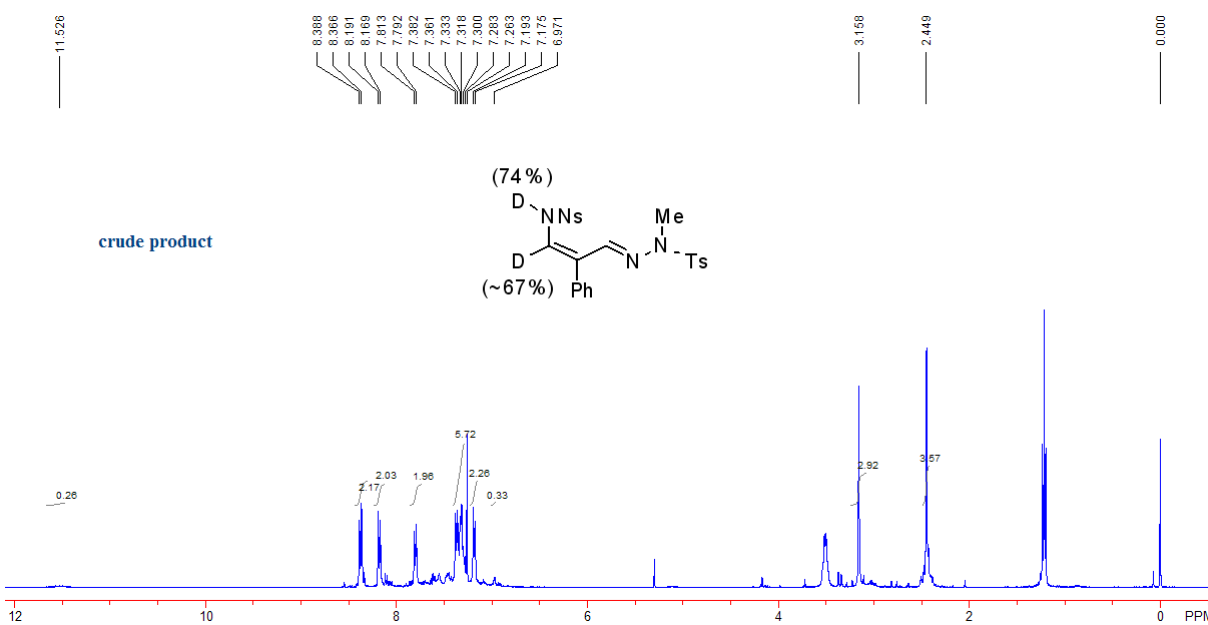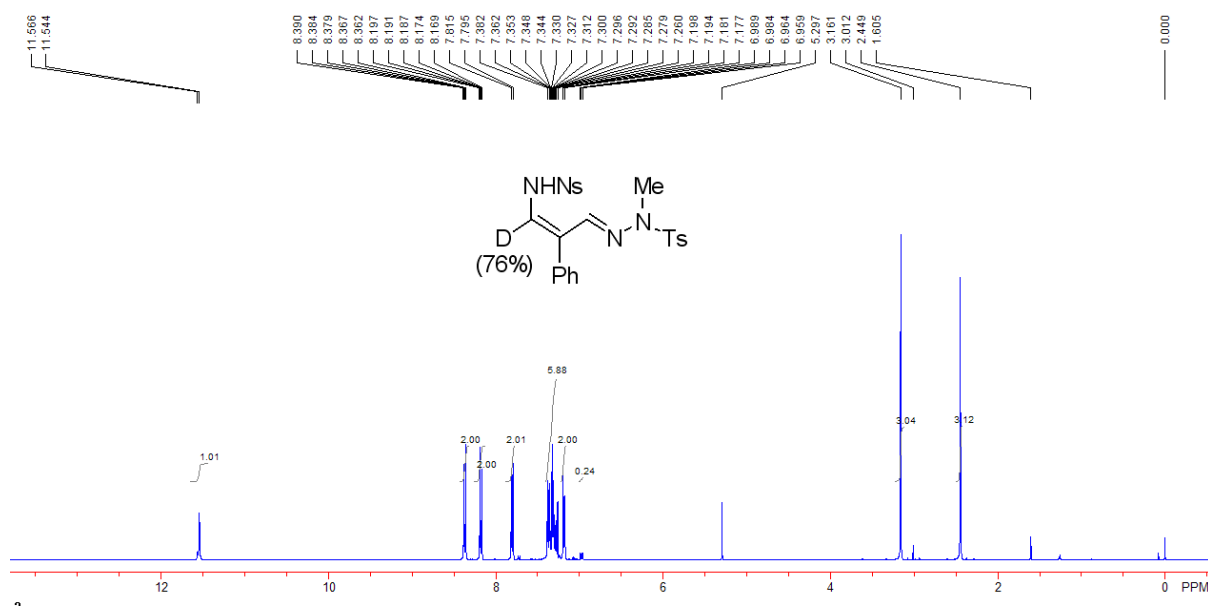

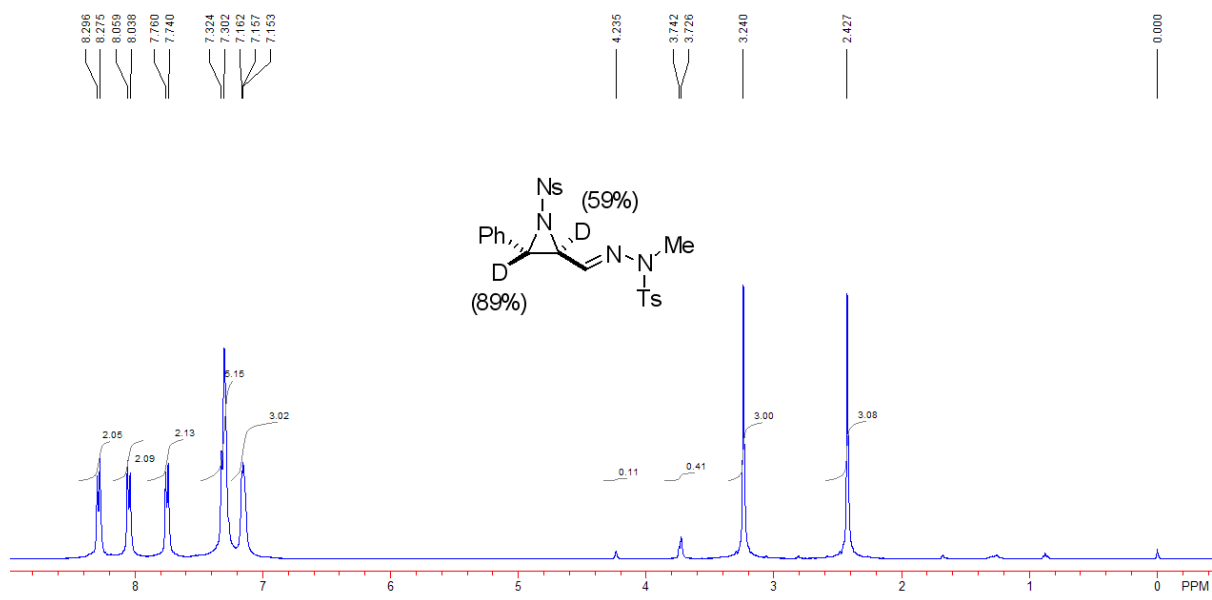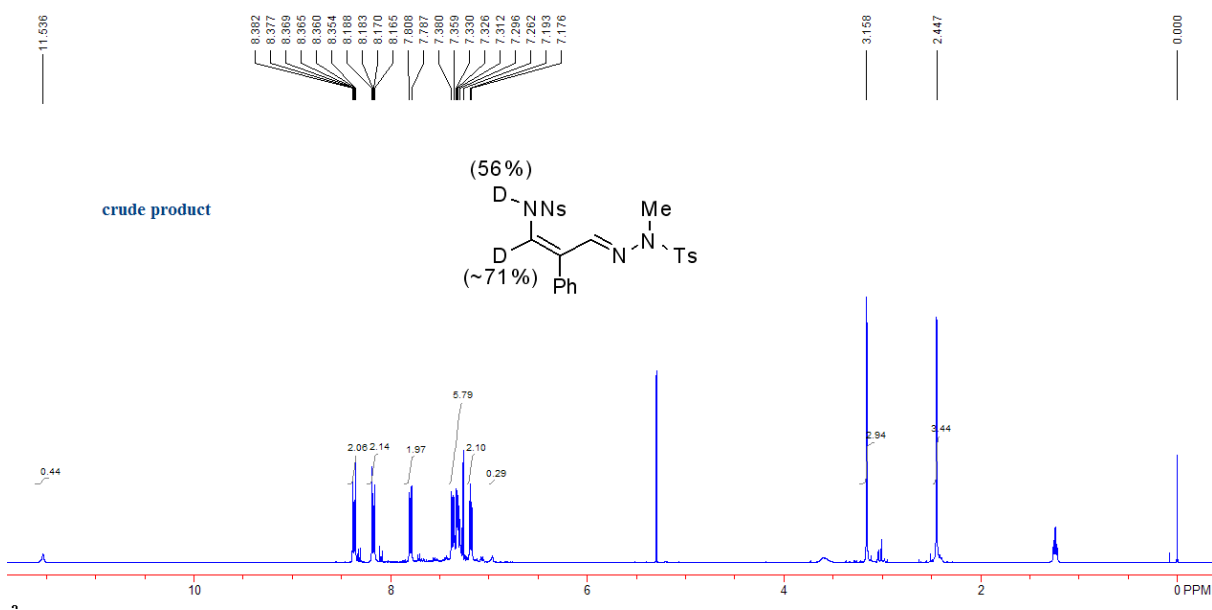



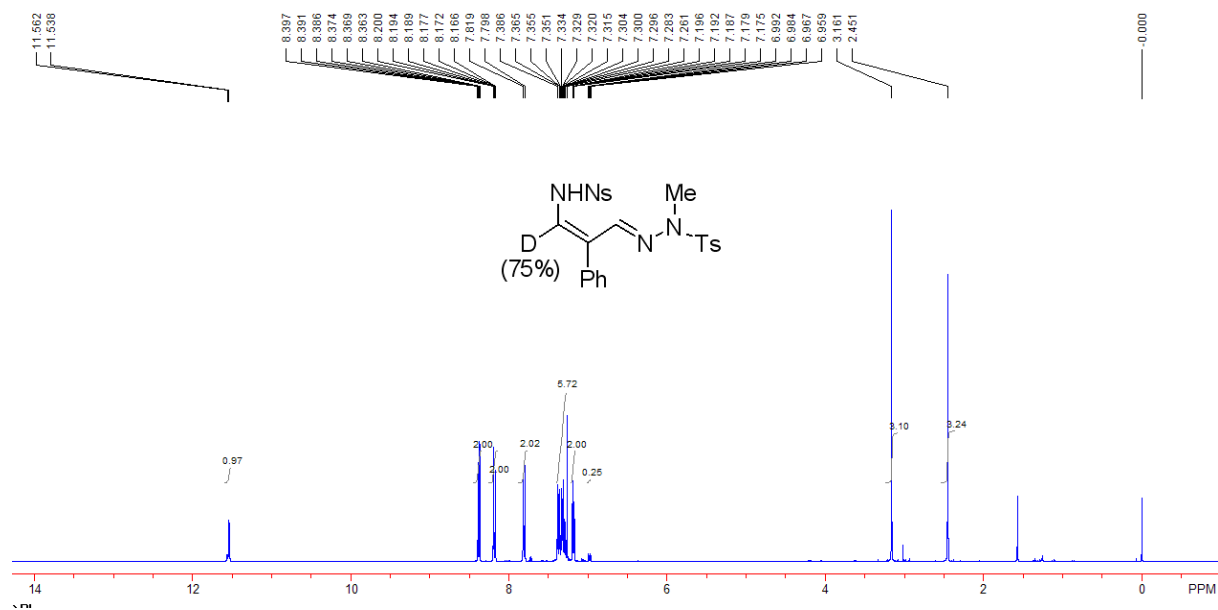

Supplement: c2cc31911j.pdf [file c2cc31911j.pdf]
